# Supplementary material for: RNA-Seq-Based Transcriptomics Study to Investigate the Genes Governing Nitrogen Use Efficiency in Indian Wheat Cultivars
Source: Front Genet. 2022 Mar 31;13:853910. doi: 10.3389/fgene.2022.853910 (PMC9009086; doi:10.3389/fgene.2022.853910)
Supplement: Supplementary file 1 [file Table2.XLSX]

## Sheet: 703_root_upregulated
test_id	gene	locus	703 N+(control)	703 N- (stress)	log2(fold_change)	p_value	description	goid	Go description	Enzyme code	Enzyme name	AT gene stable ID	ATgene name	AT description
XLOC_109129	TraesCS6A02G086300	chr6A:55013534-55014280	73.9933	3537.26	5.57909	0.0181	photosystem II 5 kDa protein, chloroplastic-like	C:GO:0016020	C:membrane	0	0
XLOC_151424	TraesCSU02G077300	chrUn:69373658-69375610	85.1645	3525.07	5.37125	0.0209	photosystem II 5 kDa protein, chloroplastic-like	C:GO:0016020	C:membrane	0	0
XLOC_031313	TraesCS2B02G079300	chr2B:44310504-44311780	125.42	2871.38	4.51691	0.0204	predicted protein	P:GO:0009853; P:GO:0019253; C:GO:0009507	P:photorespiration; P:reductive pentose-phosphate cycle; C:chloroplast	0	0	AT5G38410	0	Ribulose bisphosphate carboxylase small chain [Source:UniProtKB/TrEMBL;Acc:B3H5S2]
XLOC_087849	TraesCS5A02G350600	chr5A:553420890-553421688	46.6931	2742.07	5.87591	0.0135	chlorophyll a-b binding protein of LHCII type 1-like	P:GO:0009416; P:GO:0009768; P:GO:0018298; F:GO:0016168; C:GO:0009522; C:GO:0009523; C:GO:0009535; C:GO:0009941; C:GO:0010287	P:response to light stimulus; P:photosynthesis, light harvesting in photosystem I; P:protein-chromophore linkage; F:chlorophyll binding; C:photosystem I; C:photosystem II; C:chloroplast thylakoid membrane; C:chloroplast envelope; C:plastoglobule	0	0	AT1G29920	LHCB1.1	Chlorophyll a-b binding protein 3, chloroplastic [Source:UniProtKB/Swiss-Prot;Acc:Q8VZ87]
XLOC_040131	TraesCS2D02G065100	chr2D:27853294-27854235	62.8972	2579.53	5.35797	0.0223	ribulose bisphosphate carboxylase small chain PWS4.3, chloroplastic-like	P:GO:0009853; P:GO:0019253; C:GO:0009507	P:photorespiration; P:reductive pentose-phosphate cycle; C:chloroplast	0	0	AT5G38410	0	Ribulose bisphosphate carboxylase small chain [Source:UniProtKB/TrEMBL;Acc:B3H5S2]
XLOC_117365	TraesCS6B02G115900	chr6B:101222128-101222833	88.0162	2486.97	4.82048	0.03785	---NA---	0	0	0	0
XLOC_103119	TraesCS5D02G357600	chr5D:438359979-438360777	102.564	2462.93	4.58578	0.04315	chlorophyll a-b binding protein of LHCII type 1-like	P:GO:0009416; P:GO:0009768; P:GO:0018298; F:GO:0016168; C:GO:0009522; C:GO:0009523; C:GO:0009535; C:GO:0009941; C:GO:0010287	P:response to light stimulus; P:photosynthesis, light harvesting in photosystem I; P:protein-chromophore linkage; F:chlorophyll binding; C:photosystem I; C:photosystem II; C:chloroplast thylakoid membrane; C:chloroplast envelope; C:plastoglobule	0	0	AT1G29920	LHCB1.1	Chlorophyll a-b binding protein 3, chloroplastic [Source:UniProtKB/Swiss-Prot;Acc:Q8VZ87]
XLOC_022993	TraesCS2A02G066700	chr2A:30020632-30021500	44.6303	2149.43	5.58979	0.0198	predicted protein	P:GO:0009853; P:GO:0019253; C:GO:0009507	P:photorespiration; P:reductive pentose-phosphate cycle; C:chloroplast	0	0	AT5G38410	0	Ribulose bisphosphate carboxylase small chain [Source:UniProtKB/TrEMBL;Acc:B3H5S2]
XLOC_031315	TraesCS2B02G079500	chr2B:44360474-44361961	33.326	2090.32	5.97094	0.0139	ribulose bisphosphate carboxylase small chain PW9, chloroplastic-like	P:GO:0009853; P:GO:0015977; P:GO:0015979; C:GO:0009536	P:photorespiration; P:carbon fixation; P:photosynthesis; C:plastid	0	0	AT5G38410	0	Ribulose bisphosphate carboxylase small chain [Source:UniProtKB/TrEMBL;Acc:B3H5S2]
XLOC_040136	TraesCS2D02G065600	chr2D:27901254-27902757	23.3876	1921.29	6.36019	0.0101	ribulose bisphosphate carboxylase small chain PW9, chloroplastic	P:GO:0009853; P:GO:0015977; P:GO:0015979; C:GO:0009536	P:photorespiration; P:carbon fixation; P:photosynthesis; C:plastid	0	0	AT5G38410	0	Ribulose bisphosphate carboxylase small chain [Source:UniProtKB/TrEMBL;Acc:B3H5S2]
XLOC_020697	TraesCS2A02G206200	chr2A:185125695-185127138	73.8784	1884.87	4.67317	0.0371	chlorophyll a-b binding protein CP29.1, chloroplastic-like	P:GO:0009416; P:GO:0009768; P:GO:0018298; F:GO:0016168; C:GO:0009522; C:GO:0009523; C:GO:0009535; C:GO:0009941; C:GO:0010287	P:response to light stimulus; P:photosynthesis, light harvesting in photosystem I; P:protein-chromophore linkage; F:chlorophyll binding; C:photosystem I; C:photosystem II; C:chloroplast thylakoid membrane; C:chloroplast envelope; C:plastoglobule	0	0	AT3G08940	LHCB4.2	Chlorophyll a-b binding protein CP29.2, chloroplastic [Source:UniProtKB/Swiss-Prot;Acc:Q9XF88]
XLOC_022999	TraesCS2A02G067300	chr2A:30125889-30127338	14.1261	1864.43	7.04422	0.00365	ribulose bisphosphate carboxylase small chain PW9, chloroplastic	P:GO:0009853; P:GO:0015977; P:GO:0015979; C:GO:0009536	P:photorespiration; P:carbon fixation; P:photosynthesis; C:plastid	0	0	AT5G38410	0	Ribulose bisphosphate carboxylase small chain [Source:UniProtKB/TrEMBL;Acc:B3H5S2]
XLOC_040132	TraesCS2D02G065200	chr2D:27859562-27860987	20.7666	1722.23	6.37387	0.00815	ribulose bisphosphate carboxylase small chain PW9, chloroplastic-like	P:GO:0009853; P:GO:0015977; P:GO:0015979; C:GO:0009536	P:photorespiration; P:carbon fixation; P:photosynthesis; C:plastid	0	0	AT5G38410	0	Ribulose bisphosphate carboxylase small chain [Source:UniProtKB/TrEMBL;Acc:B3H5S2]
XLOC_143162	TraesCS7D02G227300	chr7D:187197114-187198532	36.9397	1700.68	5.52479	0.0218	---NA---	0	0	0	0	AT3G54890	LHCA1	Chlorophyll a-b binding protein, chloroplastic [Source:UniProtKB/TrEMBL;Acc:A0A178VBT7]
XLOC_023691	TraesCS2A02G204800	chr2A:182283176-182284452	63.9931	1671.06	4.7067	0.0365	chlorophyll a-b binding protein of LHCII type III, chloroplastic	P:GO:0009635; P:GO:0009644; P:GO:0009737; P:GO:0009768; P:GO:0009769; P:GO:0010119; P:GO:0018298; F:GO:0016168; F:GO:0019904; F:GO:0046872; C:GO:0009517; C:GO:0009522; C:GO:0009523; C:GO:0009941; C:GO:0010287; C:GO:0016021	P:response to herbicide; P:response to high light intensity; P:response to abscisic acid; P:photosynthesis, light harvesting in photosystem I; P:photosynthesis, light harvesting in photosystem II; P:regulation of stomatal movement; P:protein-chromophore linkage; F:chlorophyll binding; F:protein domain specific binding; F:metal ion binding; C:PSII associated light-harvesting complex II; C:photosys…	0	0	AT5G54270	LHCB3	Chlorophyll a-b binding protein 3, chloroplastic [Source:UniProtKB/Swiss-Prot;Acc:Q9S7M0]
XLOC_031312	TraesCS2B02G079200	chr2B:44285558-44286975	42.7614	1593.96	5.22016	0.02445	ribulose bisphosphate carboxylase small chain PW9, chloroplastic	P:GO:0009853; P:GO:0015977; P:GO:0015979; C:GO:0009536	P:photorespiration; P:carbon fixation; P:photosynthesis; C:plastid	0	0	AT5G38410	0	Ribulose bisphosphate carboxylase small chain [Source:UniProtKB/TrEMBL;Acc:B3H5S2]
XLOC_001970	TraesCS1A02G403300	chr1A:566564177-566564978	23.5399	1571.36	6.06076	0.01135	chlorophyll a-b binding protein of LHCII type 1	P:GO:0009416; P:GO:0009768; P:GO:0018298; F:GO:0016168; C:GO:0009522; C:GO:0009523; C:GO:0009535; C:GO:0009941; C:GO:0010287	P:response to light stimulus; P:photosynthesis, light harvesting in photosystem I; P:protein-chromophore linkage; F:chlorophyll binding; C:photosystem I; C:photosystem II; C:chloroplast thylakoid membrane; C:chloroplast envelope; C:plastoglobule	0	0	AT1G29920	LHCB1.1	Chlorophyll a-b binding protein 3, chloroplastic [Source:UniProtKB/Swiss-Prot;Acc:Q8VZ87]
XLOC_102514	TraesCS5D02G238300	chr5D:346636681-346638071	62.6714	1570.1	4.6469	0.0372	chlorophyll a-b binding protein P4, chloroplastic	P:GO:0009416; P:GO:0009768; P:GO:0018298; F:GO:0016168; C:GO:0009522; C:GO:0009523; C:GO:0009535	P:response to light stimulus; P:photosynthesis, light harvesting in photosystem I; P:protein-chromophore linkage; F:chlorophyll binding; C:photosystem I; C:photosystem II; C:chloroplast thylakoid membrane	0	0	AT3G47470	LHCA4	Chlorophyll a-b binding protein, chloroplastic [Source:UniProtKB/TrEMBL;Acc:A0A178VEE6]
XLOC_040853	TraesCS2D02G209900	chr2D:165539762-165541348	70.5768	1504.17	4.41363	0.0478	chlorophyll a-b binding protein CP29.1, chloroplastic-like	P:GO:0009416; P:GO:0009768; P:GO:0018298; F:GO:0016168; C:GO:0009522; C:GO:0009523; C:GO:0009535; C:GO:0009941; C:GO:0010287	P:response to light stimulus; P:photosynthesis, light harvesting in photosystem I; P:protein-chromophore linkage; F:chlorophyll binding; C:photosystem I; C:photosystem II; C:chloroplast thylakoid membrane; C:chloroplast envelope; C:plastoglobule	0	0	AT3G08940	LHCB4.2	Chlorophyll a-b binding protein CP29.2, chloroplastic [Source:UniProtKB/Swiss-Prot;Acc:Q9XF88]
XLOC_075500	TraesCS4B02G089500	chr4B:90727551-90729319	66.6157	1394.57	4.38781	0.04985	chlorophyll a-b binding protein CP26, chloroplastic	P:GO:0009416; P:GO:0009768; P:GO:0018298; F:GO:0016168; C:GO:0009522; C:GO:0009523; C:GO:0009535; C:GO:0010287	P:response to light stimulus; P:photosynthesis, light harvesting in photosystem I; P:protein-chromophore linkage; F:chlorophyll binding; C:photosystem I; C:photosystem II; C:chloroplast thylakoid membrane; C:plastoglobule	0	0	AT4G10340	LHCB5	Chlorophyll a-b binding protein, chloroplastic [Source:UniProtKB/TrEMBL;Acc:A0A178UW55]
XLOC_089954	TraesCS5A02G229300	chr5A:444940394-444945371	39.3683	1300.48	5.04587	0.03455	chlorophyll a-b binding protein P4, chloroplastic	P:GO:0009416; P:GO:0009768; P:GO:0018298; F:GO:0016168; C:GO:0009522; C:GO:0009523; C:GO:0009535	P:response to light stimulus; P:photosynthesis, light harvesting in photosystem I; P:protein-chromophore linkage; F:chlorophyll binding; C:photosystem I; C:photosystem II; C:chloroplast thylakoid membrane	0	0	AT3G47470	LHCA4	Chlorophyll a-b binding protein, chloroplastic [Source:UniProtKB/TrEMBL;Acc:A0A178VEE6]
XLOC_097467	TraesCS5B02G227900	chr5B:404186173-404191433	63.5346	1294.15	4.34831	0.04675	chlorophyll a-b binding protein P4, chloroplastic	P:GO:0009416; P:GO:0009768; P:GO:0018298; F:GO:0016168; C:GO:0009522; C:GO:0009523; C:GO:0009535	P:response to light stimulus; P:photosynthesis, light harvesting in photosystem I; P:protein-chromophore linkage; F:chlorophyll binding; C:photosystem I; C:photosystem II; C:chloroplast thylakoid membrane	0	0	AT3G47470	LHCA4	Chlorophyll a-b binding protein, chloroplastic [Source:UniProtKB/TrEMBL;Acc:A0A178VEE6]
XLOC_031311	TraesCS2B02G079100	chr2B:44272599-44274689	31.1843	1212.81	5.28139	0.025	predicted protein	P:GO:0009853; P:GO:0019253; C:GO:0009507	P:photorespiration; P:reductive pentose-phosphate cycle; C:chloroplast	0	0	AT5G38410	0	Ribulose bisphosphate carboxylase small chain [Source:UniProtKB/TrEMBL;Acc:B3H5S2]
XLOC_041374	TraesCS2D02G320900	chr2D:412280559-412281895	18.7866	1200.58	5.99788	0.01325	chlorophyll a-b binding protein CP24 10B, chloroplastic	P:GO:0009768; P:GO:0010196; P:GO:0018298; F:GO:0003729; F:GO:0016168; F:GO:0019904; C:GO:0009522; C:GO:0009523; C:GO:0009535; C:GO:0009941; C:GO:0010287	P:photosynthesis, light harvesting in photosystem I; P:nonphotochemical quenching; P:protein-chromophore linkage; F:mRNA binding; F:chlorophyll binding; F:protein domain specific binding; C:photosystem I; C:photosystem II; C:chloroplast thylakoid membrane; C:chloroplast envelope; C:plastoglobule	0	0	AT1G15820	LHCB6	Chlorophyll a-b binding protein, chloroplastic [Source:UniProtKB/TrEMBL;Acc:Q9LMQ2]
XLOC_071124	TraesCS4A02G099800	chr4A:112696406-112697520	13.5881	1192.55	6.45556	0.00845	ATP synthase subunit b', chloroplastic	P:GO:0015986; F:GO:0015078; C:GO:0016021; C:GO:0045263	P:ATP synthesis coupled proton transport; F:proton transmembrane transporter activity; C:integral component of membrane; C:proton-transporting ATP synthase complex, coupling factor F(o)	EC:7	Translocases
XLOC_106210	TraesCS5D02G422800	chr5D:482596930-482598512	55.0557	1174.3	4.41477	0.04305	photosystem I reaction center subunit III, chloroplastic	P:GO:0015979; C:GO:0009535; C:GO:0009538; C:GO:0009543; C:GO:0016021	P:photosynthesis; C:chloroplast thylakoid membrane; C:photosystem I reaction center; C:chloroplast thylakoid lumen; C:integral component of membrane	0	0
XLOC_029009	TraesCS2B02G233400	chr2B:231972645-231974543	48.6164	1167.48	4.58581	0.03985	photosystem II subunit29	P:GO:0009416; P:GO:0009768; P:GO:0018298; F:GO:0016168; C:GO:0009522; C:GO:0009523; C:GO:0009535; C:GO:0009941; C:GO:0010287	P:response to light stimulus; P:photosynthesis, light harvesting in photosystem I; P:protein-chromophore linkage; F:chlorophyll binding; C:photosystem I; C:photosystem II; C:chloroplast thylakoid membrane; C:chloroplast envelope; C:plastoglobule	0	0	AT3G08940	LHCB4.2	Chlorophyll a-b binding protein CP29.2, chloroplastic [Source:UniProtKB/Swiss-Prot;Acc:Q9XF88]
XLOC_045989	TraesCS3A02G230000	chr3A:430330493-430337814	18.9557	1092.67	5.84908	0.0088	carbonic anhydrase, chloroplastic isoform X1	P:GO:0015976; F:GO:0004089; F:GO:0008270; C:GO:0009570	P:carbon utilization; F:carbonate dehydratase activity; F:zinc ion binding; C:chloroplast stroma	EC:4.2.1.1	Carbonic anhydrase	AT1G70410	BCA4	Beta carbonic anhydrase 4 [Source:UniProtKB/Swiss-Prot;Acc:Q94CE4]
XLOC_028463	TraesCS2B02G118900	chr2B:84976460-84977217	29.0531	1081.91	5.21875	0.03065	ricin B-like lectin R40G3	0	0	0	0	AT2G39050	EULS3	Ricin B-like lectin EULS3 [Source:UniProtKB/Swiss-Prot;Acc:Q945P1]
XLOC_082021	TraesCS4D02G205400	chr4D:352807841-352808842	13.868	1035.95	6.22304	0.0095	ATP synthase subunit b', chloroplastic	P:GO:0015986; F:GO:0015078; C:GO:0016021; C:GO:0045263	P:ATP synthesis coupled proton transport; F:proton transmembrane transporter activity; C:integral component of membrane; C:proton-transporting ATP synthase complex, coupling factor F(o)	EC:7	Translocases
XLOC_029523	TraesCS2B02G342200	chr2B:488191654-488193668	46.6139	1005.67	4.43126	0.04565	predicted protein	P:GO:0006006; F:GO:0004365; F:GO:0050661; F:GO:0051287; C:GO:0009507; C:GO:0048046	P:glucose metabolic process; F:glyceraldehyde-3-phosphate dehydrogenase (NAD+) (phosphorylating) activity; F:NADP binding; F:NAD binding; C:chloroplast; C:apoplast	EC:1.2.1.59; EC:1.2.1.12	Glyceraldehyde-3-phosphate dehydrogenase (NAD(P)(+)) (phosphorylating); Glyceraldehyde-3-phosphate dehydrogenase (phosphorylating)	AT3G26650	GAPA1	Glyceraldehyde-3-phosphate dehydrogenase GAPA1, chloroplastic [Source:UniProtKB/Swiss-Prot;Acc:P25856]
XLOC_055115	TraesCS3B02G578200	chr3B:807812737-807814097	9.29274	953.96	6.68168	0.0058	homeotic protein female sterile-like	0	0	0	0
XLOC_083224	TraesCS4D02G086400	chr4D:61956010-61958242	16.8535	948.495	5.81452	0.0114	chlorophyll a-b binding protein CP26, chloroplastic	P:GO:0009416; P:GO:0009768; P:GO:0018298; F:GO:0016168; C:GO:0009522; C:GO:0009523; C:GO:0009535; C:GO:0010287	P:response to light stimulus; P:photosynthesis, light harvesting in photosystem I; P:protein-chromophore linkage; F:chlorophyll binding; C:photosystem I; C:photosystem II; C:chloroplast thylakoid membrane; C:plastoglobule	0	0	AT4G10340	LHCB5	Chlorophyll a-b binding protein, chloroplastic [Source:UniProtKB/TrEMBL;Acc:A0A178UW55]
XLOC_064694	TraesCS3D02G223300	chr3D:304327661-304335024	10.4613	905.042	6.43486	0.003	carbonic anhydrase, chloroplastic isoform X1	P:GO:0015976; F:GO:0004089; F:GO:0008270; C:GO:0009570	P:carbon utilization; F:carbonate dehydratase activity; F:zinc ion binding; C:chloroplast stroma	EC:4.2.1.1	Carbonic anhydrase	AT1G70410	BCA4	Beta carbonic anhydrase 4 [Source:UniProtKB/Swiss-Prot;Acc:Q94CE4]
XLOC_115414	TraesCS6B02G191500	chr6B:225867205-225868316	24.2649	881.854	5.18359	0.02865	chlorophyll a-b binding protein 8, chloroplastic	P:GO:0009416; P:GO:0009768; P:GO:0018298; F:GO:0016168; F:GO:0046872; C:GO:0009522; C:GO:0009523; C:GO:0009535; C:GO:0010287	P:response to light stimulus; P:photosynthesis, light harvesting in photosystem I; P:protein-chromophore linkage; F:chlorophyll binding; F:metal ion binding; C:photosystem I; C:photosystem II; C:chloroplast thylakoid membrane; C:plastoglobule	0	0	AT1G61520	LHCA3	Chlorophyll a-b binding protein, chloroplastic [Source:UniProtKB/TrEMBL;Acc:A0A178W5Y6]
XLOC_020919	TraesCS2A02G254600	chr2A:387775954-387776908	17.1697	853.413	5.6353	0.04685	oxygen-evolving enhancer protein 2, chloroplastic	P:GO:0015979; F:GO:0005509; C:GO:0009535; C:GO:0009654; C:GO:0019898	P:photosynthesis; F:calcium ion binding; C:chloroplast thylakoid membrane; C:photosystem II oxygen evolving complex; C:extrinsic component of membrane	0	0	AT1G06680	PSBP1	Oxygen-evolving enhancer protein 2-1, chloroplastic [Source:UniProtKB/Swiss-Prot;Acc:Q42029]
XLOC_076013	TraesCS4B02G204500	chr4B:436319052-436320074	34.2994	820.237	4.57978	0.0465	ATP synthase subunit b', chloroplastic	P:GO:0015986; F:GO:0015078; C:GO:0016021; C:GO:0045263	P:ATP synthesis coupled proton transport; F:proton transmembrane transporter activity; C:integral component of membrane; C:proton-transporting ATP synthase complex, coupling factor F(o)	EC:7	Translocases
XLOC_031310	TraesCS2B02G078900	chr2B:44190499-44192003	12.0625	817.223	6.08212	0.0116	ribulose bisphosphate carboxylase small chain PWS4.3, chloroplastic-like	P:GO:0009853; P:GO:0019253; C:GO:0009507	P:photorespiration; P:reductive pentose-phosphate cycle; C:chloroplast	0	0	AT5G38410	0	Ribulose bisphosphate carboxylase small chain [Source:UniProtKB/TrEMBL;Acc:B3H5S2]
XLOC_088120	TraesCS5A02G402600	chr5A:595371690-595372650	27.9199	813.69	4.86511	0.03735	predicted protein	C:GO:0009512; C:GO:0016021	C:cytochrome b6f complex; C:integral component of membrane	0	0
XLOC_040318	TraesCS2D02G101000	chr2D:54066233-54067273	21.0501	772.833	5.19826	0.02665	ricin B-like lectin R40G3	0	0	0	0	AT2G39050	EULS3	Ricin B-like lectin EULS3 [Source:UniProtKB/Swiss-Prot;Acc:Q945P1]
XLOC_091181	TraesCS5A02G488000	chr5A:657774907-657778981	21.4496	763.95	5.15445	0.0303	---NA---	0	0	0	0
XLOC_106600	TraesCS5D02G502900	chr5D:530054218-530055003	18.8007	735.763	5.29038	0.02635	predicted protein	C:GO:0009507	C:chloroplast	0	0
XLOC_031314	TraesCS2B02G079400	chr2B:44346179-44347892	10.5529	715.171	6.08258	0.0124	ribulose bisphosphate carboxylase small chain PW9, chloroplastic	P:GO:0009853; P:GO:0015977; P:GO:0015979; C:GO:0009536	P:photorespiration; P:carbon fixation; P:photosynthesis; C:plastid	0	0	AT5G38410	0	Ribulose bisphosphate carboxylase small chain [Source:UniProtKB/TrEMBL;Acc:B3H5S2]
XLOC_095623	TraesCS5B02G426500	chr5B:602245974-602251801	17.3047	708.368	5.35527	0.01735	---NA---	0	0	0	0	AT3G14415	0	GOX2 [Source:UniProtKB/TrEMBL;Acc:A0A384L6X3]
XLOC_038398	TraesCS2D02G322900	chr2D:414955070-414956541	10.6192	681.451	6.00386	0.0143	predicted protein	P:GO:0006006; F:GO:0004365; F:GO:0050661; F:GO:0051287; C:GO:0009507; C:GO:0048046	P:glucose metabolic process; F:glyceraldehyde-3-phosphate dehydrogenase (NAD+) (phosphorylating) activity; F:NADP binding; F:NAD binding; C:chloroplast; C:apoplast	EC:1.2.1.59; EC:1.2.1.12	Glyceraldehyde-3-phosphate dehydrogenase (NAD(P)(+)) (phosphorylating); Glyceraldehyde-3-phosphate dehydrogenase (phosphorylating)	AT3G26650	GAPA1	Glyceraldehyde-3-phosphate dehydrogenase GAPA1, chloroplastic [Source:UniProtKB/Swiss-Prot;Acc:P25856]
XLOC_124999	TraesCS6D02G291600	chr6D:402134973-402136553	41.1111	661.641	4.00845	0.04105	glycine cleavage system H protein, mitochondrial	P:GO:0009249; P:GO:0019464; C:GO:0005739; C:GO:0005960	P:protein lipoylation; P:glycine decarboxylation via glycine cleavage system; C:mitochondrion; C:glycine cleavage complex	0	0	AT2G35370	GDH1	Glycine cleavage system H protein [Source:UniProtKB/TrEMBL;Acc:A0A178VV72]
XLOC_075725	TraesCS4B02G140200,TraesCS4B02G140300	chr4B:184603010-184610015	10.2709	661.109	6.00826	0.00575
XLOC_082573	TraesCS4D02G319400	chr4D:483136900-483139384	15.2695	587.26	5.26528	0.02505	glyceraldehyde-3-phosphate dehydrogenase B, chloroplastic	P:GO:0006006; F:GO:0004365; F:GO:0050661; F:GO:0051287; C:GO:0009507	P:glucose metabolic process; F:glyceraldehyde-3-phosphate dehydrogenase (NAD+) (phosphorylating) activity; F:NADP binding; F:NAD binding; C:chloroplast	EC:1.2.1.59; EC:1.2.1.12	Glyceraldehyde-3-phosphate dehydrogenase (NAD(P)(+)) (phosphorylating); Glyceraldehyde-3-phosphate dehydrogenase (phosphorylating)	AT1G42970	GAPB	Glyceraldehyde-3-phosphate dehydrogenase GAPB, chloroplastic [Source:UniProtKB/Swiss-Prot;Acc:P25857]
XLOC_130182	TraesCS7A02G071100	chr7A:36859398-36862918	18.2515	574.131	4.97529	0.03415	---NA---	0	0	0	0	AT2G45290	TKL-2	Transketolase-2, chloroplastic [Source:UniProtKB/Swiss-Prot;Acc:F4IW47]
XLOC_094345	TraesCS5B02G172000	chr5B:316531658-316532539	22.7961	554.251	4.60368	0.04105	dirigent protein 2-like	C:GO:0048046	C:apoplast	0	0	AT3G13662	DIR8	Dirigent protein 8 [Source:UniProtKB/Swiss-Prot;Acc:F4JDF3]
XLOC_087291	TraesCS5A02G239100	chr5A:455206388-455207045	19.7175	505.599	4.68045	0.041	probable calcium-binding protein CML15	F:GO:0005509	F:calcium ion binding	0	0
XLOC_039316	TraesCS2D02G500600	chr2D:595161544-595166080	26.5144	495.659	4.2245	0.03915	glutamine synthetase leaf isozyme, chloroplastic	P:GO:0006542; F:GO:0004356; F:GO:0005524; C:GO:0009507	P:glutamine biosynthetic process; F:glutamate-ammonia ligase activity; F:ATP binding; C:chloroplast	EC:6.3.1.2	Glutamine synthetase	AT5G35630	GLN2	Glutamine synthetase, chloroplastic/mitochondrial [Source:UniProtKB/Swiss-Prot;Acc:Q43127]
XLOC_096909	TraesCS5B02G115300	chr5B:192348592-192350382	13.4848	483.281	5.16345	0.02755	fructose-bisphosphate aldolase, chloroplastic	P:GO:0006094; P:GO:0006096; P:GO:0030388; F:GO:0004332; C:GO:0005829; C:GO:0010287	P:gluconeogenesis; P:glycolytic process; P:fructose 1,6-bisphosphate metabolic process; F:fructose-bisphosphate aldolase activity; C:cytosol; C:plastoglobule	EC:4.1.2.13	Fructose-bisphosphate aldolase	AT4G38970	FBA2	Fructose-bisphosphate aldolase [Source:UniProtKB/TrEMBL;Acc:A0A178UW98]
XLOC_000159	TraesCS1A02G030000	chr1A:13979249-13980335	19.4554	478.317	4.61973	0.04505	predicted protein	P:GO:0032055; C:GO:0009535; C:GO:0016021	P:negative regulation of translation in response to stress; C:chloroplast thylakoid membrane; C:integral component of membrane	0	0	AT5G02160	0	AT5g02160 [Source:UniProtKB/TrEMBL;Acc:Q9FPH2]
XLOC_091476	TraesCS5A02G548600	chr5A:702520374-702522882	17.7728	464.513	4.70798	0.0362	predicted protein	0	0	0	0	AT5G64240	AMC3	Metacaspase-3 [Source:UniProtKB/Swiss-Prot;Acc:Q9FMG1]
XLOC_032071	TraesCS2B02G234500	chr2B:233267618-233269292	17.0851	448.636	4.71473	0.04195	cytochrome b6-f complex iron-sulfur subunit, chloroplastic	P:GO:0009767; P:GO:0055085; F:GO:0009496; F:GO:0045158; F:GO:0046872; F:GO:0051537; C:GO:0005886; C:GO:0009535; C:GO:0016021	P:photosynthetic electron transport chain; P:transmembrane transport; F:plastoquinol--plastocyanin reductase activity; F:electron transporter, transferring electrons within cytochrome b6/f complex of photosystem II activity; F:metal ion binding; F:2 iron, 2 sulfur cluster binding; C:plasma membrane; C:chloroplast thylakoid membrane; C:integral component of membrane	EC:1.10.9; EC:7.1.1.6	Acting on diphenols and related substances as donors; Plastoquinol--plastocyanin reductase	AT4G03280	PETC	Cytochrome b6-f complex iron-sulfur subunit, chloroplastic [Source:UniProtKB/Swiss-Prot;Acc:Q9ZR03]
XLOC_088227	TraesCS5A02G424400	chr5A:609866676-609875081	14.4923	445.434	4.94185	0.0277	---NA---	0	0	0	0	AT3G14415	0	GOX2 [Source:UniProtKB/TrEMBL;Acc:A0A384L6X3]
XLOC_143900	TraesCS7D02G373100	chr7D:483877432-483879202	16.9874	428.036	4.65519	0.04655	thiamine thiazole synthase 2, chloroplastic	P:GO:0006974; P:GO:0009228; P:GO:0009409; P:GO:0052837; F:GO:0005506; F:GO:0008270; F:GO:0016763; F:GO:0019904; F:GO:0042803; C:GO:0005739; C:GO:0005829; C:GO:0009570; C:GO:0009579; C:GO:0009941; C:GO:0010319	P:cellular response to DNA damage stimulus; P:thiamine biosynthetic process; P:response to cold; P:thiazole biosynthetic process; F:iron ion binding; F:zinc ion binding; F:pentosyltransferase activity; F:protein domain specific binding; F:protein homodimerization activity; C:mitochondrion; C:cytosol; C:chloroplast stroma; C:thylakoid; C:chloroplast envelope; C:stromule	EC:2.4.2	Glycosyltransferases	AT5G54770	THI1	Thiamine thiazole synthase, chloroplastic [Source:UniProtKB/TrEMBL;Acc:A0A178UNL2]
XLOC_022199	TraesCS2A02G500400	chr2A:729292892-729297753	24.6065	423.276	4.10449	0.0394	glutamine synthetase leaf isozyme, chloroplastic	P:GO:0006542; F:GO:0004356; F:GO:0005524; C:GO:0009507	P:glutamine biosynthetic process; F:glutamate-ammonia ligase activity; F:ATP binding; C:chloroplast	EC:6.3.1.2	Glutamine synthetase	AT5G35630	GLN2	Glutamine synthetase, chloroplastic/mitochondrial [Source:UniProtKB/Swiss-Prot;Acc:Q43127]
XLOC_098568	TraesCS5B02G463100	chr5B:638396835-638398001	14.4556	374.163	4.69397	0.04195	chlorophyll a-b binding protein of LHCII type 1-like	P:GO:0009765; P:GO:0018298; F:GO:0016168; C:GO:0009522; C:GO:0009523; C:GO:0009535	P:photosynthesis, light harvesting; P:protein-chromophore linkage; F:chlorophyll binding; C:photosystem I; C:photosystem II; C:chloroplast thylakoid membrane	0	0	AT1G29920	LHCB1.1	Chlorophyll a-b binding protein 3, chloroplastic [Source:UniProtKB/Swiss-Prot;Acc:Q8VZ87]
XLOC_106407	TraesCS5D02G464700	chr5D:507771413-507772537	9.89783	373.051	5.23612	0.0264	chlorophyll a-b binding protein of LHCII type 1-like	P:GO:0009765; P:GO:0018298; F:GO:0016168; C:GO:0009522; C:GO:0009523; C:GO:0009535	P:photosynthesis, light harvesting; P:protein-chromophore linkage; F:chlorophyll binding; C:photosystem I; C:photosystem II; C:chloroplast thylakoid membrane	0	0	AT1G29920	LHCB1.1	Chlorophyll a-b binding protein 3, chloroplastic [Source:UniProtKB/Swiss-Prot;Acc:Q8VZ87]
XLOC_135508	TraesCS7B02G148000	chr7B:194588829-194591957	12.0139	356.586	4.89147	0.041	serine--glyoxylate aminotransferase	P:GO:0019265; F:GO:0004760; F:GO:0008453; C:GO:0005777	P:glycine biosynthetic process, by transamination of glyoxylate; F:serine-pyruvate transaminase activity; F:alanine-glyoxylate transaminase activity; C:peroxisome	EC:2.6.1.44; EC:2.6.1.51	Alanine--glyoxylate transaminase; Serine--pyruvate transaminase	AT2G13360	AGT1	Serine--glyoxylate aminotransferase [Source:UniProtKB/Swiss-Prot;Acc:Q56YA5]
XLOC_123709	TraesCS6D02G029300	chr6D:11407718-11409707	9.75772	317.527	5.02419	0.03275	chloroplast stem-loop binding protein of 41 kDa a, chloroplastic	P:GO:0006364; P:GO:0032544; P:GO:0045727; P:GO:0045893; F:GO:0003729; F:GO:0003824; F:GO:0008266; C:GO:0005829; C:GO:0009534; C:GO:0009941; C:GO:0010287; C:GO:0048046	P:rRNA processing; P:plastid translation; P:positive regulation of translation; P:positive regulation of transcription, DNA-templated; F:mRNA binding; F:catalytic activity; F:poly(U) RNA binding; C:cytosol; C:chloroplast thylakoid; C:chloroplast envelope; C:plastoglobule; C:apoplast	0	0	AT3G63140	CSP41A	Chloroplast stem-loop binding protein of 41 kDa a, chloroplastic [Source:UniProtKB/Swiss-Prot;Acc:Q9LYA9]
XLOC_022031	TraesCS2A02G467900	chr2A:711977004-711980293	10.7928	310.528	4.84658	0.02705	aminomethyltransferase, mitochondrial	P:GO:0019464; P:GO:0032259; F:GO:0004047; F:GO:0008483; C:GO:0005739	P:glycine decarboxylation via glycine cleavage system; P:methylation; F:aminomethyltransferase activity; F:transaminase activity; C:mitochondrion	EC:2.6.1; EC:2.1.2.10; EC:2.1.1	Transferring nitrogenous groups; Aminomethyltransferase; Transferring one-carbon groups	AT1G11860	0	Glycine cleavage T-protein family [Source:TAIR;Acc:AT1G11860]
XLOC_145178	TraesCS7D02G066500	chr7D:37285158-37288724	9.59703	309.375	5.01063	0.0329	transketolase, chloroplastic	P:GO:0006098; F:GO:0004802; F:GO:0046872; C:GO:0005829	P:pentose-phosphate shunt; F:transketolase activity; F:metal ion binding; C:cytosol	EC:2.2.1.1	Transketolase	AT2G45290	TKL-2	Transketolase-2, chloroplastic [Source:UniProtKB/Swiss-Prot;Acc:F4IW47]
XLOC_084453	TraesCS4D02G329400	chr4D:487652495-487653546	13.2256	294.5	4.47686	0.0457	---NA---	0	0	0	0
XLOC_083006	TraesCS4D02G041200	chr4D:19393840-19399829	13.2174	284.057	4.42567	0.04635	peptidyl-prolyl cis-trans isomerase FKBP17-2, chloroplastic	P:GO:0000413; F:GO:0003755; C:GO:0009507	P:protein peptidyl-prolyl isomerization; F:peptidyl-prolyl cis-trans isomerase activity; C:chloroplast	EC:5.2.1.8	Peptidylprolyl isomerase	AT1G73655	FKBP17-3	Peptidylprolyl isomerase [Source:UniProtKB/TrEMBL;Acc:A0A178WAL2]
XLOC_039621	TraesCS2D02G563600	chr2D:634796634-634798236	11.5621	279.812	4.59698	0.04555	protochlorophyllide reductase A, chloroplastic	P:GO:0015979; P:GO:0015995; F:GO:0005515; F:GO:0016630; C:GO:0009507	P:photosynthesis; P:chlorophyll biosynthetic process; F:protein binding; F:protochlorophyllide reductase activity; C:chloroplast	EC:1.3.1.33	Protochlorophyllide reductase	AT4G27440	PORB	Protochlorophyllide reductase B, chloroplastic [Source:UniProtKB/Swiss-Prot;Acc:P21218]
XLOC_128881	TraesCS7A02G381100	chr7A:556159298-556161155	5.86153	268.898	5.51964	0.0194	fructose-bisphosphate aldolase 5, cytosolic	P:GO:0006096; P:GO:0030388; P:GO:0055085; F:GO:0004332; F:GO:0005524; F:GO:0140359; C:GO:0005829; C:GO:0016021	P:glycolytic process; P:fructose 1,6-bisphosphate metabolic process; P:transmembrane transport; F:fructose-bisphosphate aldolase activity; F:ATP binding; F:ABC-type transporter activity; C:cytosol; C:integral component of membrane	EC:4.1.2.13; EC:7	Fructose-bisphosphate aldolase; Translocases	AT4G26530	FBA5	Fructose-bisphosphate aldolase [Source:UniProtKB/TrEMBL;Acc:A0A178V385]
XLOC_094985	TraesCS5B02G304800	chr5B:488820166-488826003	5.31217	251.27	5.56379	0.02195	---NA---	0	0	0	0
XLOC_030464	TraesCS2B02G528300	chr2B:722629775-722634463	10.4264	219.059	4.393	0.0334	plastid glutamine synthetase 2	P:GO:0006542; F:GO:0004356; F:GO:0005524; C:GO:0009507	P:glutamine biosynthetic process; F:glutamate-ammonia ligase activity; F:ATP binding; C:chloroplast	EC:6.3.1.2	Glutamine synthetase	AT5G35630	GLN2	Glutamine synthetase, chloroplastic/mitochondrial [Source:UniProtKB/Swiss-Prot;Acc:Q43127]
XLOC_143425	TraesCS7D02G278100	chr7D:267875082-267880837	14.2195	212.901	3.90424	0.04305	28 kDa ribonucleoprotein, chloroplastic	P:GO:1901259; F:GO:0003729; C:GO:0009535	P:chloroplast rRNA processing; F:mRNA binding; C:chloroplast thylakoid membrane	0	0	AT4G24770	CP31A	31 kDa ribonucleoprotein, chloroplastic [Source:UniProtKB/Swiss-Prot;Acc:Q04836]
XLOC_123620	TraesCS6D02G012200	chr6D:4773456-4775769	5.86464	204.639	5.12489	0.0269	Ferredoxin--NADP reductase, leaf isozyme, chloroplastic	P:GO:0015979; F:GO:0004324; C:GO:0098807	P:photosynthesis; F:ferredoxin-NADP+ reductase activity; C:chloroplast thylakoid membrane protein complex	EC:1.18.1.2	Ferredoxin--NADP(+) reductase	AT1G20020	LFNR2	Ferredoxin--NADP reductase, leaf isozyme 2, chloroplastic [Source:UniProtKB/Swiss-Prot;Acc:Q8W493]
XLOC_054244	TraesCS3B02G398300	chr3B:628721185-628724685	7.8528	199.797	4.66918	0.04545	sedoheptulose-1,7-bisphosphatase, chloroplastic	P:GO:0005986; P:GO:0006000; P:GO:0006002; P:GO:0006094; P:GO:0016311; P:GO:0019252; P:GO:0019253; P:GO:0030388; P:GO:0042742; F:GO:0042132; F:GO:0046872; F:GO:0050278; C:GO:0009570; C:GO:0009579; C:GO:0009941; C:GO:0048046	P:sucrose biosynthetic process; P:fructose metabolic process; P:fructose 6-phosphate metabolic process; P:gluconeogenesis; P:dephosphorylation; P:starch biosynthetic process; P:reductive pentose-phosphate cycle; P:fructose 1,6-bisphosphate metabolic process; P:defense response to bacterium; F:fructose 1,6-bisphosphate 1-phosphatase activity; F:metal ion binding; F:sedoheptulose-bisphosphatase act…	EC:3.1.3.37; EC:3.1.3.23; EC:3.1.3.11	Sedoheptulose-bisphosphatase; Sugar-phosphatase; Fructose-bisphosphatase	AT3G55800	SBPASE	Sedoheptulose-1,7-bisphosphatase, chloroplastic [Source:UniProtKB/Swiss-Prot;Acc:P46283]
XLOC_098333	TraesCS5B02G412500	chr5B:587471303-587475380	7.9413	194.258	4.61246	0.01145	malate dehydrogenase, glyoxysomal-like	P:GO:0005975; P:GO:0006099; P:GO:0006108; F:GO:0030060; C:GO:0009507	P:carbohydrate metabolic process; P:tricarboxylic acid cycle; P:malate metabolic process; F:L-malate dehydrogenase activity; C:chloroplast	EC:1.1.1.37	Malate dehydrogenase	AT2G22780	PMDH1	PMDH1 [Source:UniProtKB/TrEMBL;Acc:A0A384LAR8]
XLOC_110842	TraesCS6A02G009200	chr6A:3851156-3853368	7.98444	178.36	4.48145	0.04905	Ferredoxin--NADP reductase, leaf isozyme, chloroplastic	P:GO:0015979; F:GO:0004324; C:GO:0098807	P:photosynthesis; F:ferredoxin-NADP+ reductase activity; C:chloroplast thylakoid membrane protein complex	EC:1.18.1.2	Ferredoxin--NADP(+) reductase	AT1G20020	LFNR2	Ferredoxin--NADP reductase, leaf isozyme 2, chloroplastic [Source:UniProtKB/Swiss-Prot;Acc:Q8W493]
XLOC_124781	TraesCS6D02G247400	chr6D:350927978-350930346	4.76956	160.3	5.07078	0.02635	phosphoribulokinase, chloroplastic	P:GO:0016310; P:GO:0019253; F:GO:0005524; F:GO:0008974; C:GO:0009507	P:phosphorylation; P:reductive pentose-phosphate cycle; F:ATP binding; F:phosphoribulokinase activity; C:chloroplast	EC:2.7.1.19	Phosphoribulokinase
XLOC_129906	TraesCS7A02G020500	chr7A:8373730-8376623	5.58534	152.726	4.77316	0.0361	ferredoxin--NADP reductase, leaf isozyme 1, chloroplastic-like	P:GO:0015979; F:GO:0004324; F:GO:0005515; C:GO:0009570; C:GO:0098807	P:photosynthesis; F:ferredoxin-NADP+ reductase activity; F:protein binding; C:chloroplast stroma; C:chloroplast thylakoid membrane protein complex	EC:1.18.1.2	Ferredoxin--NADP(+) reductase	AT1G20020	LFNR2	Ferredoxin--NADP reductase, leaf isozyme 2, chloroplastic [Source:UniProtKB/Swiss-Prot;Acc:Q8W493]
XLOC_144317	TraesCS7D02G458400	chr7D:576281485-576285484	2.9477	140.749	5.57739	0.01475	ATP-dependent zinc metalloprotease FTSH 2, chloroplastic	P:GO:0006508; F:GO:0004176; F:GO:0004222; F:GO:0005524; F:GO:0046872; C:GO:0009535; C:GO:0016021	P:proteolysis; F:ATP-dependent peptidase activity; F:metalloendopeptidase activity; F:ATP binding; F:metal ion binding; C:chloroplast thylakoid membrane; C:integral component of membrane	EC:3.4.24	Acting on peptide bonds (peptidases)	AT1G06430	FTSH8	ATP-dependent zinc metalloprotease FTSH 8, chloroplastic [Source:UniProtKB/Swiss-Prot;Acc:Q8W585]
XLOC_095910	TraesCS5B02G481100	chr5B:653783127-653785481	7.93538	138.558	4.12604	0.03255	50S ribosomal protein L17, chloroplastic	P:GO:0006412; F:GO:0003735; C:GO:0009570; C:GO:0009941; C:GO:0022625	P:translation; F:structural constituent of ribosome; C:chloroplast stroma; C:chloroplast envelope; C:cytosolic large ribosomal subunit	0	0	AT3G54210	RPL17	50S ribosomal protein L17, chloroplastic [Source:UniProtKB/Swiss-Prot;Acc:Q9M385]
XLOC_081780	TraesCS4D02G151500	chr4D:176778520-176784976	7.6411	136.47	4.15866	0.02905	30S ribosomal protein S5-like	P:GO:0006412; F:GO:0003735; F:GO:0019843; C:GO:0005763	P:translation; F:structural constituent of ribosome; F:rRNA binding; C:mitochondrial small ribosomal subunit	0	0	AT2G33800	RPS5	30S ribosomal protein S5, chloroplastic [Source:UniProtKB/Swiss-Prot;Acc:P93014]
XLOC_135324	TraesCS7B02G108400	chr7B:124536485-124538463	3.83266	135.137	5.13994	0.02455	protein TIFY 11e-like	0	0	0	0
XLOC_028426	TraesCS2B02G111100	chr2B:72895028-72896639	4.99542	134.847	4.75458	0.04545	nicotianamine synthase	P:GO:0030418; F:GO:0030410	P:nicotianamine biosynthetic process; F:nicotianamine synthase activity	EC:2.5.1.43	Nicotianamine synthase
XLOC_047013	TraesCS3A02G433000	chr3A:674398849-674402933	6.58194	92.1084	3.80675	0.0382	protein THYLAKOID RHODANESE-LIKE, chloroplastic-like	0	0	0	0	AT4G01050	TROL	thylakoid rhodanese-like [Source:TAIR;Acc:AT4G01050]
XLOC_041601	TraesCS2D02G365100	chr2D:470202237-470211804	5.78853	83.9677	3.85856	0.0462	peroxisomal membrane protein 11-4	P:GO:0016559; P:GO:0044375; C:GO:0005779	P:peroxisome fission; P:regulation of peroxisome size; C:integral component of peroxisomal membrane	0	0	AT3G47430	PEX11B	Peroxisomal membrane protein 11B [Source:UniProtKB/Swiss-Prot;Acc:Q9STY0]
XLOC_049481	TraesCS3A02G416200	chr3A:658901533-658907258	4.36562	80.2445	4.20014	0.042	hornerin-like isoform X1	0	0	0	0
XLOC_041114	TraesCS2D02G262400	chr2D:318562629-318568011	4.61775	73.6253	3.99494	0.0389	Glutamate--glyoxylate aminotransferase 1	P:GO:0009058; P:GO:0009853; F:GO:0004021; F:GO:0008453; F:GO:0030170; F:GO:0047958	P:biosynthetic process; P:photorespiration; F:L-alanine:2-oxoglutarate aminotransferase activity; F:alanine-glyoxylate transaminase activity; F:pyridoxal phosphate binding; F:glycine:2-oxoglutarate aminotransferase activity	EC:2.6.1.44; EC:2.6.1.12; EC:2.6.1.2	Alanine--glyoxylate transaminase; Alanine--oxo-acid transaminase; Alanine transaminase	AT1G23310	GGAT1	Glutamate--glyoxylate aminotransferase 1 [Source:UniProtKB/Swiss-Prot;Acc:Q9LR30]
XLOC_020951	TraesCS2A02G261600	chr2A:412470459-412476108	4.15671	70.0677	4.07524	0.02305	Glutamate--glyoxylate aminotransferase 1	P:GO:0009058; P:GO:0009853; F:GO:0004021; F:GO:0008453; F:GO:0030170; F:GO:0047958	P:biosynthetic process; P:photorespiration; F:L-alanine:2-oxoglutarate aminotransferase activity; F:alanine-glyoxylate transaminase activity; F:pyridoxal phosphate binding; F:glycine:2-oxoglutarate aminotransferase activity	EC:2.6.1.44; EC:2.6.1.12; EC:2.6.1.2	Alanine--glyoxylate transaminase; Alanine--oxo-acid transaminase; Alanine transaminase	AT1G23310	GGAT1	Glutamate--glyoxylate aminotransferase 1 [Source:UniProtKB/Swiss-Prot;Acc:Q9LR30]
XLOC_143488	TraesCS7D02G289900	chr7D:336156840-336161164	2.42202	52.9004	4.449	0.02355	predicted protein	P:GO:0009409; P:GO:0009416; P:GO:0009744; C:GO:0009535; C:GO:0009570; C:GO:0009941; C:GO:0010319	P:response to cold; P:response to light stimulus; P:response to sucrose; C:chloroplast thylakoid membrane; C:chloroplast stroma; C:chloroplast envelope; C:stromule	0	0	AT1G16880	ACR11	ACR11 [Source:UniProtKB/TrEMBL;Acc:A0A178WLF3]
XLOC_037071	TraesCS2D02G049500	chr2D:18230379-18235198	3.79262	49.8914	3.71752	0.0485	ruBisCO large subunit-binding protein subunit alpha, chloroplastic	P:GO:0042026; F:GO:0005524; C:GO:0009507	P:protein refolding; F:ATP binding; C:chloroplast	0	0	AT2G28000	CPN60A1	SLP [Source:UniProtKB/TrEMBL;Acc:A0A178VZW6]
XLOC_147359	TraesCS7D02G517700,TraesCS7D02G517800	chr7D:616502119-616510524	1.91453	37.1487	4.27825	0.0252
XLOC_048186	TraesCS3A02G143200,TraesCS3A02G143300	chr3A:124179290-124195678	0.0142965	1.19161	6.38111	0.0103

## Sheet: 703_root_downregulated
test_id	gene	locus	703 N+(control)	703 N- (stress)	log2(fold_change)	p_value	description	goid	Go description	Enzyme code	Enzyme name	AT gene stable ID	ATgene name	AT description
XLOC_001307	TraesCS1A02G265700	chr1A:461351278-461352000	1002	22.985	-5.44605	0.0174	2019486Awali6 gene	P:GO:0010951; F:GO:0004867; C:GO:0005576	P:negative regulation of endopeptidase activity; F:serine-type endopeptidase inhibitor activity; C:extracellular region	0	0
XLOC_062306	TraesCS3D02G262600	chr3D:364253567-364265181	10.5414	0.398054	-4.72696	0.03455	zinc finger protein BRUTUS	F:GO:0008270; C:GO:0016021	F:zinc ion binding; C:integral component of membrane	0	0	AT3G18290	BTS	Zinc finger protein BRUTUS [Source:UniProtKB/Swiss-Prot;Acc:Q8LPQ5]
XLOC_146269	TraesCS7D02G289400	chr7D:332253596-332266109	4.2776	0.318254	-3.74855	0.04805	structural maintenance of chromosomes protein 1-like	P:GO:0007064; P:GO:0051321; F:GO:0003677; F:GO:0005524; C:GO:0005634; C:GO:0008278	P:mitotic sister chromatid cohesion; P:meiotic cell cycle; F:DNA binding; F:ATP binding; C:nucleus; C:cohesin complex	0	0	AT3G54670	SMC1	Structural maintenance of chromosomes protein 1 [Source:UniProtKB/Swiss-Prot;Acc:Q6Q1P4]
XLOC_056915	TraesCS3B02G341000	chr3B:547565017-547585322	1.73182	0.148077	-3.54787	0.0299	ubiquitin carboxyl-terminal hydrolase 13-like isoform X5	P:GO:0006511; P:GO:0016579; F:GO:0004843	P:ubiquitin-dependent protein catabolic process; P:protein deubiquitination; F:thiol-dependent deubiquitinase	EC:3.4.19.12	Ubiquitinyl hydrolase 1

## Sheet: 703_shoot_upregulated
test_id	gene	locus	703 N+(control)	703 N- (stress)	log2(fold_change)	p_value	Description	Goid	Go description	enzyme code	enzyme name	AT gene stable ID	AT gene	Atdescription
XLOC_007784	TraesCS1B02G289700	chr1B:505110167-505113544	5.00865	75.189	3.90803	0.02675	universal stress protein PHOS32	0	0	0	0	0	0	0
XLOC_065093	TraesCS3D02G298500	chr3D:412778967-412779681	4.7004	99.1099	4.39817	0.03325	uncharacterized protein LOC109740761	C:GO:0016021	C:integral component of membrane	0	0	0	0	0
XLOC_083842	TraesCS4D02G206100	chr4D:353757553-353761701	5.30839	115.756	4.44667	0.03195	UDP-glucuronic acid decarboxylase 6	P:GO:0042732; F:GO:0048040; F:GO:0070403; C:GO:0005737	P:D-xylose metabolic process; F:UDP-glucuronate decarboxylase activity; F:NAD+ binding; C:cytoplasm	EC:4.1.1.35	UDP-glucuronate decarboxylase	AT2G28760	UXS6	UDP-XYL synthase 6 [Source:TAIR;Acc:AT2G28760]
XLOC_020936	TraesCS2A02G258600	chr2A:406662505-406663756	3.3338	113.748	5.09253	0.0483	uclacyanin 1-like	P:GO:0022900; F:GO:0009055; C:GO:0016021; C:GO:0046658	P:electron transport chain; F:electron transfer activity; C:integral component of membrane; C:anchored component of plasma membrane	0	0	0	0	0
XLOC_052669	TraesCS3B02G063200	chr3B:35461913-35462261	14.3878	85.0773	2.56392	0.047	type 1 non-specific lipid transfer protein precursor	P:GO:0006869; F:GO:0008289; C:GO:0016020	P:lipid transport; F:lipid binding; C:membrane	0	0	0	0	0
XLOC_049150	TraesCS3A02G344700	chr3A:594348718-594349676	41.9319	676.371	4.01169	0.02965	type 1 non specific lipid transfer protein precursor	P:GO:0006869; F:GO:0008289; C:GO:0016020	P:lipid transport; F:lipid binding; C:membrane	0	0	0	0	0
XLOC_065300	TraesCS3D02G338300	chr3D:451234110-451235231	8.4475	264.792	4.97019	0.02435	type 1 non specific lipid transfer protein precursor	P:GO:0006869; F:GO:0008289; C:GO:0016020	P:lipid transport; F:lipid binding; C:membrane	0	0	0	0	0
XLOC_010301	TraesCS1B02G320800	chr1B:544996356-544999903	7.26002	119.485	4.04071	0.04705	tubulin beta-5 chain	P:GO:0000226; P:GO:0000278; F:GO:0003924; F:GO:0005200; F:GO:0005525; F:GO:0016757; C:GO:0005737; C:GO:0005874	P:microtubule cytoskeleton organization; P:mitotic cell cycle; F:GTPase activity; F:structural constituent of cytoskeleton; F:GTP binding; F:transferase activity, transferring glycosyl groups; C:cytoplasm; C:microtubule	EC:3.6.1.15	Nucleoside-triphosphate phosphatase	AT5G12250	TUBB6	Tubulin beta chain [Source:UniProtKB/TrEMBL;Acc:A0A178UPR2]
XLOC_146041	TraesCS7D02G239200	chr7D:203947109-203948657	23.1844	502.483	4.43785	0.0175	tricin synthase 1	P:GO:0032259; F:GO:0008171; F:GO:0008757; F:GO:0046872; C:GO:0005634	P:methylation; F:O-methyltransferase activity; F:S-adenosylmethionine-dependent methyltransferase activity; F:metal ion binding; C:nucleus	0	0	AT4G34050	CCoAOMT1	S-adenosyl-L-methionine-dependent methyltransferases superfamily protein [Source:TAIR;Acc:AT4G34050]
XLOC_131012	TraesCS7A02G240300	chr7A:215545814-215547567	8.99974	336.021	5.22253	0.0103	tricin synthase 1	P:GO:0032259; F:GO:0008171; F:GO:0008757; F:GO:0046872; C:GO:0005634	P:methylation; F:O-methyltransferase activity; F:S-adenosylmethionine-dependent methyltransferase activity; F:metal ion binding; C:nucleus	0	0	AT4G34050	CCoAOMT1	S-adenosyl-L-methionine-dependent methyltransferases superfamily protein [Source:TAIR;Acc:AT4G34050]
XLOC_029691	TraesCS2B02G377300	chr2B:540434847-540439432	2.54836	44.7557	4.13443	0.03045	trafficking protein particle complex protein 2	P:GO:0006888; C:GO:0005634; C:GO:0005737; C:GO:0030008	P:endoplasmic reticulum to Golgi vesicle-mediated transport; C:nucleus; C:cytoplasm; C:TRAPP complex	0	0	AT1G80500	0	SNARE-like superfamily protein [Source:UniProtKB/TrEMBL;Acc:F4HTY0]
XLOC_064472	TraesCS3D02G177100	chr3D:158457982-158458836	54.7738	690.679	3.65646	0.04335	structural protein	0	0	0	0	0	0	0
XLOC_094145	TraesCS5B02G129900	chr5B:241169853-241170950	15.7575	330.895	4.39226	0.03345	stress-response A/B barrel domain-containing protein At5g22580-like	0	0	0	0	0	0	0
XLOC_102035	TraesCS5D02G137600	chr5D:218564528-218565493	3.47699	149.352	5.42474	0.0376	stress-response A/B barrel domain-containing protein At5g22580-like	0	0	0	0	0	0	0
XLOC_086757	TraesCS5A02G130100	chr5A:291600425-291601364	3.09317	174.091	5.81461	0.0305	stress-response A/B barrel domain-containing protein At5g22580-like	0	0	0	0	0	0	0
XLOC_040318	TraesCS2D02G101000	chr2D:54066233-54067273	56.0543	850.213	3.92293	0.0282	stress responsive protein	F:GO:0030246	F:carbohydrate binding	0	0	AT2G39050	EULS3	Ricin B-like lectin EULS3 [Source:UniProtKB/Swiss-Prot;Acc:Q945P1]
XLOC_115798	TraesCS6B02G276700	chr6B:500893096-500895845	7.68291	161.853	4.39689	0.0314	S-adenosylmethionine synthase 1	P:GO:0006556; P:GO:0006730; P:GO:0055085; F:GO:0004478; F:GO:0005524; F:GO:0046872; C:GO:0005829	P:S-adenosylmethionine biosynthetic process; P:one-carbon metabolic process; P:transmembrane transport; F:methionine adenosyltransferase activity; F:ATP binding; F:metal ion binding; C:cytosol	EC:2.5.1.6	Methionine adenosyltransferase	0	0	0
XLOC_028462	TraesCS2B02G118800	chr2B:84969191-84971319	15.3974	529.691	5.10439	0.0033	ricin B-like lectin R40G2	F:GO:0030246	F:carbohydrate binding	0	0	AT2G39050	EULS3	Ricin B-like lectin EULS3 [Source:UniProtKB/Swiss-Prot;Acc:Q945P1]
XLOC_023173	TraesCS2A02G101700	chr2A:54705403-54707580	7.67816	182.846	4.57372	0.0246	ricin B-like lectin R40G2	0	0	0	0	AT2G39050	EULS3	Ricin B-like lectin EULS3 [Source:UniProtKB/Swiss-Prot;Acc:Q945P1]
XLOC_081888	TraesCS4D02G175900	chr4D:305054098-305056088	22.1283	327.777	3.88875	0.02845	ricin B-like lectin R40C1	0	0	0	0	AT2G39050	EULS3	Ricin B-like lectin EULS3 [Source:UniProtKB/Swiss-Prot;Acc:Q945P1]
XLOC_071259	TraesCS4A02G130800	chr4A:173931419-173933411	12.8445	239.816	4.2227	0.0342	ricin B-like lectin R40C1	0	0	0	0	AT2G39050	EULS3	Ricin B-like lectin EULS3 [Source:UniProtKB/Swiss-Prot;Acc:Q945P1]
XLOC_075879	TraesCS4B02G173700	chr4B:380719891-380721893	8.30719	271.959	5.03288	0.01995	ricin B-like lectin R40C1	0	0	0	0	AT2G39050	EULS3	Ricin B-like lectin EULS3 [Source:UniProtKB/Swiss-Prot;Acc:Q945P1]
XLOC_033841	TraesCS2B02G600200	chr2B:783226573-783231181	5.60283	341.834	5.931	0.00515	RecName: Full=4-hydroxy-7-methoxy-3-oxo-3,4-dihydro-2H-1,4-benzoxazin-2-yl glucoside beta-D-glucosidase 1a, chloroplastic; AltName: Full=Beta-glucosidase 1a; Short=TaGlu1a; Flags: Precursor	P:GO:0005975; F:GO:0008422; F:GO:0102483; F:GO:0102726; C:GO:0009507	P:carbohydrate metabolic process; F:beta-glucosidase activity; F:scopolin beta-glucosidase activity; F:DIMBOA glucoside beta-D-glucosidase activity; C:chloroplast	EC:3.2.1.21; EC:3.2.1.182	Beta-glucosidase; 4-hydroxy-7-methoxy-3-oxo-3,4-dihydro-2H-1,4-benzoxazin-2-yl glucoside	AT5G25980	TGG2	Myrosinase 2 [Source:UniProtKB/Swiss-Prot;Acc:Q9C5C2]
XLOC_076574	TraesCS4B02G323400	chr4B:613905572-613906745	3.44286	68.3605	4.31149	0.0364	PVR3-like protein	P:GO:0009627; F:GO:0005504	P:systemic acquired resistance; F:fatty acid binding	0	0	0	0	0
XLOC_142819	TraesCS7D02G153100	chr7D:101557556-101559329	4.83436	73.5327	3.92699	0.02815	putative senescence-associated protein	0	0	0	0	AT2G17850	0	Rhodanese/Cell cycle control phosphatase superfamily protein [Source:TAIR;Acc:AT2G17850]
XLOC_089982	TraesCS5A02G235200	chr5A:451392153-451393149	10.8626	196.561	4.17754	0.0407	putative ripening-related protein 2	C:GO:0005576	C:extracellular region	0	0	0	0	0
XLOC_110998	TraesCS6A02G040400	chr6A:21077913-21078753	3.52497	237.132	6.07193	0.0233	putative histone H2B	P:GO:0006334; F:GO:0003677; F:GO:0046982; C:GO:0000786; C:GO:0005634	P:nucleosome assembly; F:DNA binding; F:protein heterodimerization activity; C:nucleosome; C:nucleus	0	0	AT1G07790	HTB1	Histone H2B.1 [Source:UniProtKB/Swiss-Prot;Acc:Q9LQQ4]
XLOC_025500	TraesCS2A02G590600	chr2A:778722756-778724369	38.4919	952.994	4.62984	0.0465	protochlorophyllide reductase A, chloroplastic	P:GO:0015979; P:GO:0015995; P:GO:0055114; F:GO:0005515; F:GO:0016630; C:GO:0009507	P:photosynthesis; P:chlorophyll biosynthetic process; P:oxidation-reduction process; F:protein binding; F:protochlorophyllide reductase activity; C:chloroplast	EC:1.3.1.33	Protochlorophyllide reductase	AT4G27440	PORB	Protochlorophyllide reductase B, chloroplastic [Source:UniProtKB/Swiss-Prot;Acc:P21218]
XLOC_039621	TraesCS2D02G563600	chr2D:634796634-634798236	15.476	442.187	4.83655	0.01275	protochlorophyllide reductase A, chloroplastic	P:GO:0015979; P:GO:0015995; P:GO:0055114; F:GO:0005515; F:GO:0016630; C:GO:0009507	P:photosynthesis; P:chlorophyll biosynthetic process; P:oxidation-reduction process; F:protein binding; F:protochlorophyllide reductase activity; C:chloroplast	EC:1.3.1.33	Protochlorophyllide reductase	AT4G27440	PORB	Protochlorophyllide reductase B, chloroplastic [Source:UniProtKB/Swiss-Prot;Acc:P21218]
XLOC_082393	TraesCS4D02G280900	chr4D:451801606-451803311	2.67984	35.3315	3.72073	0.0449	protein YLS3-like	P:GO:0006869; F:GO:0008289; C:GO:0016021	P:lipid transport; F:lipid binding; C:integral component of membrane	0	0	0	0	0
XLOC_098674	TraesCS5B02G486000	chr5B:657336555-657340310	7.99334	99.36	3.63579	0.03525	protein trichome birefringence-like 33	F:GO:0016413; C:GO:0005794	F:O-acetyltransferase activity; C:Golgi apparatus	0	0	AT2G40320	TBL33	TBL33 [Source:UniProtKB/TrEMBL;Acc:A0A178VXJ7]
XLOC_053638	TraesCS3B02G263600	chr3B:422310247-422312438	2.62427	30.7346	3.54988	0.03615	protein trichome birefringence-like 19	F:GO:0016413; C:GO:0005794; C:GO:0016021	F:O-acetyltransferase activity; C:Golgi apparatus; C:integral component of membrane	0	0	AT3G02440	TBL20	TRICHOME BIREFRINGENCE-LIKE 20 [Source:UniProtKB/TrEMBL;Acc:A0A1I9LLY1]
XLOC_081735	TraesCS4D02G142800	chr4D:128748791-128751142	4.91357	98.1976	4.32084	0.03095	probable xyloglucan endotransglucosylase/hydrolase	P:GO:0010411; P:GO:0042546; P:GO:0071555; F:GO:0004553; F:GO:0016762; C:GO:0005618; C:GO:0048046	P:xyloglucan metabolic process; P:cell wall biogenesis; P:cell wall organization; F:hydrolase activity, hydrolyzing O-glycosyl compounds; F:xyloglucan:xyloglucosyl transferase activity; C:cell wall; C:apoplast	EC:2.4.1.207	Xyloglucan:xyloglucosyl transferase	AT2G06850	XTH4	Xyloglucan endotransglucosylase/hydrolase protein 4 [Source:UniProtKB/Swiss-Prot;Acc:Q39099]
XLOC_138775	TraesCS7B02G312800	chr7B:558759620-558760281	17.6878	784.95	5.47178	0.0347	probable non-specific lipid-transfer protein 2	P:GO:0006869	P:lipid transport	0	0	0	0	0
XLOC_104735	TraesCS5D02G110600	chr5D:125737253-125738059	5.51372	81.788	3.89079	0.04395	probable histone H2AXb	P:GO:0006342; F:GO:0003677; F:GO:0046982; C:GO:0000786; C:GO:0000790	P:chromatin silencing; F:DNA binding; F:protein heterodimerization activity; C:nucleosome; C:nuclear chromatin	0	0	AT1G08880	HTA5	Histone H2A [Source:UniProtKB/TrEMBL;Acc:A0A178W8H7]
XLOC_142248	TraesCS7D02G030700	chr7D:16153674-16155103	28.8666	341.889	3.56606	0.04895	probable glutathione S-transferase GSTU6	P:GO:0006749; F:GO:0004364; C:GO:0005737	P:glutathione metabolic process; F:glutathione transferase activity; C:cytoplasm	EC:2.5.1.18	Glutathione transferase	0	0	0
XLOC_062798	TraesCS3D02G369600	chr3D:482501275-482502264	3.50027	50.9169	3.86261	0.0454	probable glutathione S-transferase GSTU1	P:GO:0006749; F:GO:0004364; C:GO:0005737	P:glutathione metabolic process; F:glutathione transferase activity; C:cytoplasm	EC:2.5.1.18	Glutathione transferase	0	0	0
XLOC_102557	TraesCS5D02G246200	chr5D:354269091-354269781	108.042	1576.05	3.86666	0.0235	probable calcium-binding protein CML15	F:GO:0005509	F:calcium ion binding	0	0	0	0	0
XLOC_122943	TraesCS6D02G281600	chr6D:389363409-389370988	3.8111	164.734	5.43379	0.01365	probable beta-D-xylosidase 7 isoform X2	P:GO:0005975; F:GO:0004553	P:carbohydrate metabolic process; F:hydrolase activity, hydrolyzing O-glycosyl compounds	0	0	AT1G78060	BXL7	Probable beta-D-xylosidase 7 [Source:UniProtKB/Swiss-Prot;Acc:Q9SGZ5]
XLOC_058016	TraesCS3B02G568100	chr3B:799810447-799812760	28.1913	412.251	3.8702	0.02995	predicted protein	0	0	0	0	AT5G64240	AMC3	Metacaspase-3 [Source:UniProtKB/Swiss-Prot;Acc:Q9FMG1]
XLOC_096457	TraesCS5B02G021800	chr5B:20670663-20671904	19.2458	590.126	4.9384	0.01195	predicted protein	F:GO:0004364; F:GO:0043295; C:GO:0005737	F:glutathione transferase activity; F:glutathione binding; C:cytoplasm	EC:2.5.1.18	Glutathione transferase	AT3G03190	GSTF11	Glutathione S-transferase F11 [Source:UniProtKB/Swiss-Prot;Acc:Q96324]
XLOC_091476	TraesCS5A02G548600	chr5A:702520374-702522882	7.27532	264.753	5.18549	0.006	predicted protein	0	0	0	0	AT5G64240	AMC3	Metacaspase-3 [Source:UniProtKB/Swiss-Prot;Acc:Q9FMG1]
XLOC_076011	TraesCS4B02G204100	chr4B:436098390-436099118	6.7467	287.806	5.41477	0.0394	predicted protein	F:GO:0003677; F:GO:0046982; C:GO:0000786; C:GO:0005634	F:DNA binding; F:protein heterodimerization activity; C:nucleosome; C:nucleus	0	0	0	0	0
XLOC_061339	TraesCS3D02G066300	chr3D:29382877-29383454	5.23674	209.001	5.3187	0.04175	predicted protein	0	0	0	0	0	0	0
XLOC_039473	TraesCS2D02G533800	chr2D:618060583-618061128	4.51307	64.7936	3.84367	0.0225	predicted protein	0	0	0	0	0	0	0
XLOC_136040	TraesCS7B02G252300	chr7B:465157982-465163453	4.43704	92.323	4.37902	0.0464	predicted protein	C:GO:0016021	C:integral component of membrane	0	0	0	0	0
XLOC_025250	TraesCS2A02G535900	chr2A:750424657-750425232	4.07899	42.7817	3.39071	0.0266	predicted protein	0	0	0	0	0	0	0
XLOC_076928	TraesCS4B02G399500	chr4B:673534551-673535148	4.06409	88.3077	4.44153	0.0216	predicted protein	P:GO:0022900; F:GO:0009055; C:GO:0016021; C:GO:0046658	P:electron transport chain; F:electron transfer activity; C:integral component of membrane; C:anchored component of plasma membrane	0	0	0	0	0
XLOC_007733	TraesCS1B02G278800	chr1B:487144452-487145097	3.99685	69.5216	4.12052	0.0291	predicted protein	0	0	0	0	0	0	0
XLOC_135743	TraesCS7B02G194900	chr7B:334798277-334798934	3.87491	128.102	5.04699	0.0482	predicted protein	0	0	0	0	0	0	0
XLOC_095642	TraesCS5B02G430700	chr5B:605784555-605785546	3.68998	46.2678	3.64833	0.0482	predicted protein	0	0	0	0	0	0	0
XLOC_111106	TraesCS6A02G063800	chr6A:34039339-34039600	3.48327	37.2492	3.41869	0.02945	predicted protein	0	0	0	0	0	0	0
XLOC_071127	TraesCS4A02G100400	chr4A:112857364-112858147	3.26028	180.104	5.78769	0.03365	predicted protein	F:GO:0003677; F:GO:0046982; C:GO:0000786; C:GO:0005634	F:DNA binding; F:protein heterodimerization activity; C:nucleosome; C:nucleus	0	0	0	0	0
XLOC_049856	TraesCS3A02G493000	chr3A:719763555-719764466	3.25392	31.2823	3.2651	0.02755	predicted protein	0	0	0	0	0	0	0
XLOC_022970	TraesCS2A02G062400	chr2A:27733480-27734367	2.98733	49.5807	4.05285	0.03545	predicted protein	C:GO:0016021	C:integral component of membrane	0	0	0	0	0
XLOC_041342	TraesCS2D02G312200	chr2D:401540986-401541734	2.62211	37.4634	3.83668	0.02275	predicted protein	0	0	0	0	0	0	0
XLOC_150885	TraesCSU02G243200	chrUn:364044818-364045572	2.58999	39.4673	3.92964	0.02235	predicted protein	0	0	0	0	AT1G30020	0	Uncharacterized protein T1P2.11 [Source:UniProtKB/TrEMBL;Acc:Q9C8R7]
XLOC_031193	TraesCS2B02G051400	chr2B:25185631-25186524	2.55535	45.9662	4.16898	0.03115	predicted protein	0	0	0	0	0	0	0
XLOC_031914	TraesCS2B02G200300	chr2B:178773616-178775835	2.55216	77.3961	4.92247	0.03305	predicted protein	C:GO:0016021	C:integral component of membrane	0	0	0	0	0
XLOC_109545	TraesCS6A02G169100	chr6A:176573669-176574753	12.6879	321.181	4.66187	0.0234	peroxiredoxin-2E-2, chloroplastic	P:GO:0034599; P:GO:0042744; P:GO:0045454; P:GO:0055114; P:GO:0098869; F:GO:0008379; C:GO:0009570	P:cellular response to oxidative stress; P:hydrogen peroxide catabolic process; P:cell redox homeostasis; P:oxidation-reduction process; P:cellular oxidant detoxification; F:thioredoxin peroxidase activity; C:chloroplast stroma	EC:1.11.1.15; EC:1.11.1.7	Peroxiredoxin; Peroxidase	AT3G52960	PRXIIE	Peroxiredoxin-2E, chloroplastic [Source:UniProtKB/Swiss-Prot;Acc:Q949U7]
XLOC_009676	TraesCS1B02G195500	chr1B:350630694-350631492	2.85178	31.9905	3.48771	0.04725	peptidoglycan-binding LysM domain-containing protein	C:GO:0016021	C:integral component of membrane	0	0	0	0	0
XLOC_083754	TraesCS4D02G189200	chr4D:328999573-329000718	5.01111	202.847	5.33912	0.04215	pathogenesis-related protein 1-like	P:GO:0006952; P:GO:0009607; P:GO:0009738; P:GO:0032515; F:GO:0004864; F:GO:0010427; F:GO:0038023	P:defense response; P:response to biotic stimulus; P:abscisic acid-activated signaling pathway; P:negative regulation of phosphoprotein phosphatase activity; F:protein phosphatase inhibitor activity; F:abscisic acid binding; F:signaling receptor activity	0	0	0	0	0
XLOC_129455	TraesCS7A02G494700	chr7A:683707312-683708984	2.57583	33.6017	3.70542	0.0415	OSJNBa0041A02.21-like protein	P:GO:0006397	P:mRNA processing	0	0	0	0	0
XLOC_139355	TraesCS7B02G435500	chr7B:702233521-702234119	10.1299	788.751	6.28288	0.0244	Os02g0519800-like protein	C:GO:0016021	C:integral component of membrane	0	0	0	0	0
XLOC_104702	TraesCS5D02G104600	chr5D:118455059-118460088	2.71123	40.6103	3.90483	0.04795	nucleoside diphosphate kinase 2, chloroplastic-like	P:GO:0006165; P:GO:0006183; P:GO:0006228; P:GO:0006241; F:GO:0004550; F:GO:0005524	P:nucleoside diphosphate phosphorylation; P:GTP biosynthetic process; P:UTP biosynthetic process; P:CTP biosynthetic process; F:nucleoside diphosphate kinase activity; F:ATP binding	EC:2.7.4.6	Nucleoside-diphosphate kinase	AT5G63310	NDPK2	NDPK2 [Source:UniProtKB/TrEMBL;Acc:A0A384KNJ7]
XLOC_151733	TraesCSU02G147100	chrUn:168640787-168641858	35.7724	497.53	3.79787	0.04315	non-specific lipid-transfer protein 4.1-like	P:GO:0006869; F:GO:0008289; C:GO:0016020	P:lipid transport; F:lipid binding; C:membrane	0	0	0	0	0
XLOC_014451	TraesCS1D02G163900	chr1D:234528289-234529007	96.7206	1011.29	3.38624	0.04975	non-specific lipid-transfer protein 2P	P:GO:0006508; P:GO:0006869; F:GO:0008233	P:proteolysis; P:lipid transport; F:peptidase activity	0	0	0	0	0
XLOC_001826	TraesCS1A02G374200	chr1A:549637887-549638532	39.7465	648.794	4.02886	0.04035	non-specific lipid-transfer protein 2-like	P:GO:0006869; C:GO:0016021	P:lipid transport; C:integral component of membrane	0	0	0	0	0
XLOC_091168	TraesCS5A02G484900	chr5A:656209941-656210848	2.89437	69.9774	4.59557	0.0254	NDR1/HIN1-like protein 12	C:GO:0009506; C:GO:0016021; C:GO:0046658	C:plasmodesma; C:integral component of membrane; C:anchored component of plasma membrane	0	0	AT2G35960	NHL12	NDR1/HIN1-like protein 12 [Source:UniProtKB/Swiss-Prot;Acc:Q9SJ54]
XLOC_024138	TraesCS2A02G297700	chr2A:511922198-511924396	5.45232	123.455	4.50097	0.01245	NDR1/HIN1-like protein 1	C:GO:0009506; C:GO:0016021; C:GO:0046658	C:plasmodesma; C:integral component of membrane; C:anchored component of plasma membrane	0	0	AT2G35960	NHL12	NDR1/HIN1-like protein 12 [Source:UniProtKB/Swiss-Prot;Acc:Q9SJ54]
XLOC_143422	TraesCS7D02G277200	chr7D:265695956-265698602	5.70601	81.348	3.83355	0.0466	NADH dehydrogenase [ubiquinone] iron-sulfur protein 5-B	P:GO:0032981; C:GO:0005747	P:mitochondrial respiratory chain complex I assembly; C:mitochondrial respiratory chain complex I	0	0	AT2G47690	0	NADH dehydrogenase [ubiquinone] iron-sulfur protein 5-A [Source:UniProtKB/Swiss-Prot;Acc:O82238]
XLOC_087406	TraesCS5A02G262500	chr5A:475644080-475645286	18.1015	932.888	5.68752	0.0052	---NA---	0	0	0	0	0	0	0
XLOC_055546	TraesCS3B02G062600	chr3B:34465985-34467232	14.2685	220.388	3.94914	0.04585	---NA---	0	0	0	0	0	0	0
XLOC_010577	TraesCS1B02G380600	chr1B:613340149-613340644	6.21577	227.366	5.19294	0.0414	---NA---	0	0	0	0	0	0	0
XLOC_061678	TraesCS3D02G134700	chr3D:93608066-93609318	5.34273	180.957	5.08193	0.04965	---NA---	0	0	0	0	0	0	0
XLOC_030235	TraesCS2B02G483100	chr2B:680521969-680522596	5.12701	619.283	6.91634	0.022	---NA---	0	0	0	0	0	0	0
XLOC_055982	TraesCS3B02G151000	chr3B:142238116-142239361	4.86594	209.479	5.42794	0.03695	---NA---	0	0	0	0	0	0	0
XLOC_048973	TraesCS3A02G307900	chr3A:546417024-546418212	4.31342	235.984	5.77371	0.03545	---NA---	0	0	0	0	0	0	0
XLOC_046328	TraesCS3A02G302400	chr3A:535727268-535728626	3.03709	40.4848	3.73662	0.04445	---NA---	0	0	0	0	AT1G13830	0	Carbohydrate-binding X8 domain superfamily protein [Source:TAIR;Acc:AT1G13830]
XLOC_052964	TraesCS3B02G123700	chr3B:96070747-96071587	3.52497	258.947	6.1989	0.02425	monothiol glutaredoxin-S2	P:GO:0022900; F:GO:0009055; F:GO:0015035; F:GO:0046872; F:GO:0051537; C:GO:0005737	P:electron transport chain; F:electron transfer activity; F:protein disulfide oxidoreductase activity; F:metal ion binding; F:2 iron, 2 sulfur cluster binding; C:cytoplasm	0	0	AT4G33040	GRXC6	Glutaredoxin-C6 [Source:UniProtKB/Swiss-Prot;Acc:Q8L9S3]
XLOC_038423	TraesCS2D02G328200	chr2D:421480421-421481366	10.6095	329.609	4.95733	0.0226	MLP-like protein 423	P:GO:0006952; P:GO:0009738; P:GO:0032515; F:GO:0004864; F:GO:0010427; F:GO:0038023	P:defense response; P:abscisic acid-activated signaling pathway; P:negative regulation of phosphoprotein phosphatase activity; F:protein phosphatase inhibitor activity; F:abscisic acid binding; F:signaling receptor activity	0	0	AT1G23130	0	At1g23130/T26J12_10 [Source:UniProtKB/TrEMBL;Acc:O49304]
XLOC_021338	TraesCS2A02G334000	chr2A:567735195-567736166	6.24624	361.191	5.85363	0.0313	MLP-like protein 423	P:GO:0006952; P:GO:0009738; P:GO:0032515; F:GO:0004864; F:GO:0010427; F:GO:0038023	P:defense response; P:abscisic acid-activated signaling pathway; P:negative regulation of phosphoprotein phosphatase activity; F:protein phosphatase inhibitor activity; F:abscisic acid binding; F:signaling receptor activity	0	0	AT1G23130	0	At1g23130/T26J12_10 [Source:UniProtKB/TrEMBL;Acc:O49304]
XLOC_078181	TraesCS4B02G252900	chr4B:518687123-518688205	2.79195	47.389	4.08521	0.0335	MFP1 attachment factor 1	0	0	0	0	0	0	0
XLOC_055212	TraesCS3B02G601700	chr3B:822067205-822068221	57.1794	939.42	4.0382	0.02275	metallothionein-like protein 2C	F:GO:0046872	F:metal ion binding	0	0	0	0	0
XLOC_032725	TraesCS2B02G364000	chr2B:518053517-518055683	6.5805	108.27	4.0403	0.047	Malate synthase, glyoxysomal	P:GO:0006097; P:GO:0006099; F:GO:0004474; C:GO:0005737	P:glyoxylate cycle; P:tricarboxylic acid cycle; F:malate synthase activity; C:cytoplasm	EC:2.3.3.9	Malate synthase	AT5G03860	MLS	Malate synthase [Source:UniProtKB/Swiss-Prot;Acc:Q9LZC3]
XLOC_071160	TraesCS4A02G107000	chr4A:122627021-122627745	3.9837	144.003	5.17585	0.04385	low temperature-induced protein lt101.2	C:GO:0016021	C:integral component of membrane	0	0	AT1G57550	0	UPF0057 membrane protein At1g57550 [Source:UniProtKB/Swiss-Prot;Acc:Q9FE70]
XLOC_088924	TraesCS5A02G007900	chr5A:4956290-4959912	12.8362	140.277	3.44999	0.0462	Lipoxygenase 2.1, chloroplastic	P:GO:0009753; P:GO:0031408; P:GO:0055114; F:GO:0016165; F:GO:0046872; C:GO:0009507	P:response to jasmonic acid; P:oxylipin biosynthetic process; P:oxidation-reduction process; F:linoleate 13S-lipoxygenase activity; F:metal ion binding; C:chloroplast	EC:1.13.11; EC:1.13.11.12	Acting on single donors with incorporation of molecular oxygen (oxygenases). The oxygen incorporated need not be derived from O(2); Linoleate 13S-lipoxygenase	AT3G45140	LOX2	Lipoxygenase 2, chloroplastic [Source:UniProtKB/Swiss-Prot;Acc:P38418]
XLOC_122590	TraesCS6D02G206200	chr6D:291959116-291960716	6.90007	181.795	4.71956	0.02475	leucine-rich repeat-like protein	C:GO:0016020	C:membrane	0	0	AT1G49750	0	AT1G49750 protein [Source:UniProtKB/TrEMBL;Acc:Q9FXA1]
XLOC_101850	TraesCS5D02G100100	chr5D:112356497-112357540	3.25754	109.77	5.07456	0.0449	hypothetical protein CFC21_076394	0	0	0	0	AT1G09310	0	T31J12.3 protein [Source:UniProtKB/TrEMBL;Acc:Q9ZPZ4]
XLOC_098090	TraesCS5B02G357300	chr5B:536591015-536592976	2.51802	22.0956	3.13339	0.03105	hypothetical protein CFC21_073192	0	0	0	0	AT2G44360	0	Ecotropic viral integration site protein [Source:UniProtKB/TrEMBL;Acc:O64870]
XLOC_077707	TraesCS4B02G156800	chr4B:291847451-291848095	4.00736	46.7605	3.54456	0.04545	hypothetical protein CFC21_057511	C:GO:0016021	C:integral component of membrane	0	0	0	0	0
XLOC_056870	TraesCS3B02G333000	chr3B:539466614-539467603	3.24363	65.7269	4.3408	0.03515	hypothetical protein CFC21_042291	C:GO:0016021	C:integral component of membrane	0	0	0	0	0
XLOC_032969	TraesCS2B02G415700	chr2B:594204780-594205713	5.85332	129.201	4.46422	0.0439	hypothetical protein CFC21_024765	0	0	0	0	0	0	0
XLOC_087851	TraesCS5A02G352100	chr5A:554285727-554288017	3.45574	77.4283	4.48579	0.034	HMG1/2-like protein	F:GO:0003677; C:GO:0005634; C:GO:0016021	F:DNA binding; C:nucleus; C:integral component of membrane	0	0	AT1G20693	HMGB2	High mobility group B protein 2 [Source:UniProtKB/Swiss-Prot;Acc:O49596]
XLOC_098085	TraesCS5B02G356200	chr5B:535714905-535715481	111.678	1695.12	3.92397	0.02805	histone H4	P:GO:0006334; P:GO:0009414; F:GO:0003677; F:GO:0003779; F:GO:0046982; C:GO:0000786; C:GO:0005730; C:GO:0005774; C:GO:0005829; C:GO:0005886; C:GO:0009506; C:GO:0009507; C:GO:0009579; C:GO:0042025	P:nucleosome assembly; P:response to water deprivation; F:DNA binding; F:actin binding; F:protein heterodimerization activity; C:nucleosome; C:nucleolus; C:vacuolar membrane; C:cytosol; C:plasma membrane; C:plasmodesma; C:chloroplast; C:thylakoid; C:host cell nucleus	0	0	0	0	0
XLOC_087836	TraesCS5A02G347900	chr5A:550801993-550802529	73.9676	1109.79	3.90725	0.04055	histone H4	P:GO:0006334; P:GO:0009414; F:GO:0003677; F:GO:0003779; F:GO:0046982; C:GO:0000786; C:GO:0005730; C:GO:0005774; C:GO:0005829; C:GO:0005886; C:GO:0009506; C:GO:0009507; C:GO:0009579; C:GO:0042025	P:nucleosome assembly; P:response to water deprivation; F:DNA binding; F:actin binding; F:protein heterodimerization activity; C:nucleosome; C:nucleolus; C:vacuolar membrane; C:cytosol; C:plasma membrane; C:plasmodesma; C:chloroplast; C:thylakoid; C:host cell nucleus	0	0	0	0	0
XLOC_103102	TraesCS5D02G354200	chr5D:436578425-436578936	60.2076	837.383	3.79787	0.0487	histone H4	F:GO:0003677; F:GO:0046982; C:GO:0000786; C:GO:0005634; C:GO:0042025	F:DNA binding; F:protein heterodimerization activity; C:nucleosome; C:nucleus; C:host cell nucleus	0	0	AT1G07820	0	Histone H4 [Source:UniProtKB/TrEMBL;Acc:Q6NR90]
XLOC_087837	TraesCS5A02G348000	chr5A:551041409-551041930	56.5614	1145.38	4.33986	0.0278	histone H4	F:GO:0003677; F:GO:0046982; C:GO:0000786; C:GO:0005634; C:GO:0042025	F:DNA binding; F:protein heterodimerization activity; C:nucleosome; C:nucleus; C:host cell nucleus	0	0	0	0	0
XLOC_112066	TraesCS6A02G260700	chr6A:484079079-484079545	56.3828	1380.75	4.61405	0.02205	histone H4	F:GO:0003677; F:GO:0046982; C:GO:0000786; C:GO:0005634; C:GO:0042025	F:DNA binding; F:protein heterodimerization activity; C:nucleosome; C:nucleus; C:host cell nucleus	0	0	0	0	0
XLOC_095219	TraesCS5B02G349000	chr5B:530609395-530609905	42.9339	706.965	4.04145	0.0421	histone H4	F:GO:0003677; F:GO:0046982; C:GO:0000786; C:GO:0005634; C:GO:0042025	F:DNA binding; F:protein heterodimerization activity; C:nucleosome; C:nucleus; C:host cell nucleus	0	0	0	0	0
XLOC_016857	TraesCS1D02G204700	chr1D:289782069-289782940	34.9816	557.892	3.99532	0.03705	histone H4	F:GO:0003677; F:GO:0046982; C:GO:0000786; C:GO:0005634; C:GO:0042025	F:DNA binding; F:protein heterodimerization activity; C:nucleosome; C:nucleus; C:host cell nucleus	0	0	0	0	0
XLOC_117175	TraesCS6B02G078200	chr6B:54662321-54663006	32.1542	864.217	4.74832	0.01675	histone H4	F:GO:0003677; F:GO:0046982; C:GO:0000786; C:GO:0005634; C:GO:0042025	F:DNA binding; F:protein heterodimerization activity; C:nucleosome; C:nucleus; C:host cell nucleus	0	0	0	0	0
XLOC_095220	TraesCS5B02G349100	chr5B:530613511-530614490	30.7118	509.137	4.05119	0.03255	histone H4	P:GO:0006334; P:GO:0009414; F:GO:0003677; F:GO:0003779; F:GO:0046982; C:GO:0000786; C:GO:0005730; C:GO:0005774; C:GO:0005829; C:GO:0005886; C:GO:0009506; C:GO:0009507; C:GO:0009579; C:GO:0042025	P:nucleosome assembly; P:response to water deprivation; F:DNA binding; F:actin binding; F:protein heterodimerization activity; C:nucleosome; C:nucleolus; C:vacuolar membrane; C:cytosol; C:plasma membrane; C:plasmodesma; C:chloroplast; C:thylakoid; C:host cell nucleus	0	0	0	0	0
XLOC_103101	TraesCS5D02G354100	chr5D:436349478-436350094	27.8769	592.339	4.40928	0.03075	histone H4	F:GO:0003677; F:GO:0046982; C:GO:0000786; C:GO:0005634; C:GO:0042025	F:DNA binding; F:protein heterodimerization activity; C:nucleosome; C:nucleus; C:host cell nucleus	0	0	AT1G07660	0	Histone H4 [Source:UniProtKB/Swiss-Prot;Acc:P59259]
XLOC_105948	TraesCS5D02G360900	chr5D:440374922-440375514	22.1768	974.073	5.45691	0.03545	histone H4	F:GO:0003677; F:GO:0046982; C:GO:0000786; C:GO:0005634; C:GO:0042025	F:DNA binding; F:protein heterodimerization activity; C:nucleosome; C:nucleus; C:host cell nucleus	0	0	AT1G07820	0	Histone H4 [Source:UniProtKB/TrEMBL;Acc:Q6NR90]
XLOC_105912	TraesCS5D02G354700	chr5D:436823653-436824090	21.8987	1447.12	6.0462	0.0273	histone H4	F:GO:0003677; F:GO:0046982; C:GO:0000786; C:GO:0005634; C:GO:0042025	F:DNA binding; F:protein heterodimerization activity; C:nucleosome; C:nucleus; C:host cell nucleus	0	0	0	0	0
XLOC_117178	TraesCS6B02G079200	chr6B:55694762-55695328	14.0007	561.186	5.32491	0.04635	histone H4	F:GO:0003677; F:GO:0046982; C:GO:0000786; C:GO:0005634; C:GO:0042025	F:DNA binding; F:protein heterodimerization activity; C:nucleosome; C:nucleus; C:host cell nucleus	0	0	0	0	0
XLOC_098050	TraesCS5B02G349900	chr5B:530973052-530974153	13.0761	377.52	4.85155	0.01935	histone H4	P:GO:0006334; P:GO:0009414; F:GO:0003677; F:GO:0003779; F:GO:0046982; C:GO:0000786; C:GO:0005730; C:GO:0005774; C:GO:0005829; C:GO:0005886; C:GO:0009506; C:GO:0009507; C:GO:0009579; C:GO:0042025	P:nucleosome assembly; P:response to water deprivation; F:DNA binding; F:actin binding; F:protein heterodimerization activity; C:nucleosome; C:nucleolus; C:vacuolar membrane; C:cytosol; C:plasma membrane; C:plasmodesma; C:chloroplast; C:thylakoid; C:host cell nucleus	0	0	0	0	0
XLOC_046601	TraesCS3A02G354300	chr3A:602012257-602012891	12.804	559.754	5.45013	0.0408	histone H4	F:GO:0003677; F:GO:0046982; C:GO:0000786; C:GO:0005634; C:GO:0042025	F:DNA binding; F:protein heterodimerization activity; C:nucleosome; C:nucleus; C:host cell nucleus	0	0	0	0	0
XLOC_017264	TraesCS1D02G286700	chr1D:384846537-384847143	11.3773	502.408	5.46462	0.0429	histone H4	F:GO:0003677; F:GO:0046982; C:GO:0000786; C:GO:0005634; C:GO:0042025	F:DNA binding; F:protein heterodimerization activity; C:nucleosome; C:nucleus; C:host cell nucleus	0	0	AT5G59690	0	Histone H4 [Source:UniProtKB/TrEMBL;Acc:Q6NR90]
XLOC_111095	TraesCS6A02G061300	chr6A:32913019-32913628	10.7882	452.649	5.39087	0.0421	histone H4	F:GO:0003677; F:GO:0046982; C:GO:0000786; C:GO:0005634; C:GO:0042025	F:DNA binding; F:protein heterodimerization activity; C:nucleosome; C:nucleus; C:host cell nucleus	0	0	0	0	0
XLOC_150262	TraesCSU02G121200	chrUn:103670529-103671121	10.3148	510.838	5.63008	0.036	histone H4	F:GO:0003677; F:GO:0046982; C:GO:0000786; C:GO:0005634; C:GO:0042025	F:DNA binding; F:protein heterodimerization activity; C:nucleosome; C:nucleus; C:host cell nucleus	0	0	0	0	0
XLOC_123895	TraesCS6D02G061700	chr6D:28707571-28708138	10.0473	477.835	5.57163	0.0376	histone H4	F:GO:0003677; F:GO:0046982; C:GO:0000786; C:GO:0005634; C:GO:0042025	F:DNA binding; F:protein heterodimerization activity; C:nucleosome; C:nucleus; C:host cell nucleus	0	0	0	0	0
XLOC_001745	TraesCS1A02G359900	chr1A:541343757-541344446	9.95365	423.52	5.41106	0.04315	histone H4	F:GO:0003677; F:GO:0046982; C:GO:0000786; C:GO:0005634; C:GO:0042025	F:DNA binding; F:protein heterodimerization activity; C:nucleosome; C:nucleus; C:host cell nucleus	0	0	0	0	0
XLOC_087588	TraesCS5A02G299500	chr5A:509043585-509044132	9.26133	580.473	5.96987	0.0294	histone H4	F:GO:0003677; F:GO:0046982; C:GO:0000786; C:GO:0005634; C:GO:0042025	F:DNA binding; F:protein heterodimerization activity; C:nucleosome; C:nucleus; C:host cell nucleus	0	0	0	0	0
XLOC_078047	TraesCS4B02G225000	chr4B:471337869-471338390	6.5769	275.173	5.38679	0.0388	histone H4	F:GO:0003677; F:GO:0046982; C:GO:0000786; C:GO:0005634; C:GO:0042025	F:DNA binding; F:protein heterodimerization activity; C:nucleosome; C:nucleus; C:host cell nucleus	0	0	0	0	0
XLOC_048139	TraesCS3A02G133900	chr3A:111103485-111104194	5.89397	227.934	5.27323	0.04275	histone H4	P:GO:0006334; P:GO:0009414; F:GO:0003677; F:GO:0003779; F:GO:0046982; C:GO:0000786; C:GO:0005730; C:GO:0005774; C:GO:0005829; C:GO:0005886; C:GO:0009506; C:GO:0009507; C:GO:0009579; C:GO:0042025	P:nucleosome assembly; P:response to water deprivation; F:DNA binding; F:actin binding; F:protein heterodimerization activity; C:nucleosome; C:nucleolus; C:vacuolar membrane; C:cytosol; C:plasma membrane; C:plasmodesma; C:chloroplast; C:thylakoid; C:host cell nucleus	0	0	0	0	0
XLOC_111081	TraesCS6A02G059000	chr6A:31263989-31264530	5.7988	146.623	4.66021	0.0224	histone H4	F:GO:0003677; F:GO:0046982; C:GO:0000786; C:GO:0005634; C:GO:0042025	F:DNA binding; F:protein heterodimerization activity; C:nucleosome; C:nucleus; C:host cell nucleus	0	0	0	0	0
XLOC_003563	TraesCS1A02G287800	chr1A:485012382-485012973	5.4318	574.167	6.7239	0.0222	histone H4	F:GO:0003677; F:GO:0046982; C:GO:0000786; C:GO:0005634; C:GO:0042025	F:DNA binding; F:protein heterodimerization activity; C:nucleosome; C:nucleus; C:host cell nucleus	0	0	0	0	0
XLOC_001763	TraesCS1A02G363000	chr1A:543928299-543928828	5.42237	236.526	5.44693	0.03445	histone H4	P:GO:0006334; P:GO:0009414; F:GO:0003677; F:GO:0003779; F:GO:0046982; C:GO:0000786; C:GO:0005730; C:GO:0005774; C:GO:0005829; C:GO:0005886; C:GO:0009506; C:GO:0009507; C:GO:0009579; C:GO:0042025	P:nucleosome assembly; P:response to water deprivation; F:DNA binding; F:actin binding; F:protein heterodimerization activity; C:nucleosome; C:nucleolus; C:vacuolar membrane; C:cytosol; C:plasma membrane; C:plasmodesma; C:chloroplast; C:thylakoid; C:host cell nucleus	0	0	0	0	0
XLOC_123899	TraesCS6D02G062100	chr6D:28992099-28992730	5.30171	286.304	5.75495	0.032	histone H4	F:GO:0003677; F:GO:0046982; C:GO:0000786; C:GO:0005634; C:GO:0042025	F:DNA binding; F:protein heterodimerization activity; C:nucleosome; C:nucleus; C:host cell nucleus	0	0	0	0	0
XLOC_114828	TraesCS6B02G074000	chr6B:50459421-50460078	4.95128	75.4812	3.93024	0.0384	histone H4	F:GO:0003677; F:GO:0046982; C:GO:0000786; C:GO:0005634; C:GO:0042025	F:DNA binding; F:protein heterodimerization activity; C:nucleosome; C:nucleus; C:host cell nucleus	0	0	0	0	0
XLOC_111096	TraesCS6A02G061600	chr6A:33008102-33008662	4.85645	155.288	4.9989	0.04615	histone H4	F:GO:0003677; F:GO:0046982; C:GO:0000786; C:GO:0005634; C:GO:0042025	F:DNA binding; F:protein heterodimerization activity; C:nucleosome; C:nucleus; C:host cell nucleus	0	0	0	0	0
XLOC_118759	TraesCS6B02G404400	chr6B:679982960-679983486	4.83898	400.399	6.37059	0.02835	histone H4	P:GO:0006334; P:GO:0009414; F:GO:0003677; F:GO:0003779; F:GO:0046982; C:GO:0000786; C:GO:0005730; C:GO:0005774; C:GO:0005829; C:GO:0005886; C:GO:0009506; C:GO:0009507; C:GO:0009579; C:GO:0042025	P:nucleosome assembly; P:response to water deprivation; F:DNA binding; F:actin binding; F:protein heterodimerization activity; C:nucleosome; C:nucleolus; C:vacuolar membrane; C:cytosol; C:plasma membrane; C:plasmodesma; C:chloroplast; C:thylakoid; C:host cell nucleus	0	0	0	0	0
XLOC_114849	TraesCS6B02G078900	chr6B:55436478-55437342	4.79386	241.88	5.65696	0.03265	histone H4	F:GO:0003677; F:GO:0046982; C:GO:0000786; C:GO:0005634; C:GO:0042025	F:DNA binding; F:protein heterodimerization activity; C:nucleosome; C:nucleus; C:host cell nucleus	0	0	0	0	0
XLOC_111165	TraesCS6A02G075200	chr6A:45346664-45347350	4.21024	129.974	4.94818	0.0477	histone H4	F:GO:0003677; F:GO:0046982; C:GO:0000786; C:GO:0005634; C:GO:0042025	F:DNA binding; F:protein heterodimerization activity; C:nucleosome; C:nucleus; C:host cell nucleus	0	0	AT3G53730	0	Histone H4 [Source:UniProtKB/TrEMBL;Acc:Q6NR90]
XLOC_010174	TraesCS1B02G297100	chr1B:516961005-516961638	3.43892	122.496	5.15464	0.0452	histone H4	F:GO:0003677; F:GO:0046982; C:GO:0000786; C:GO:0005634; C:GO:0042025	F:DNA binding; F:protein heterodimerization activity; C:nucleosome; C:nucleus; C:host cell nucleus	0	0	0	0	0
XLOC_121841	TraesCS6D02G063300	chr6D:29756920-29757731	3.0933	267.801	6.43587	0.02525	histone H4	F:GO:0003677; F:GO:0046982; C:GO:0000786; C:GO:0005634; C:GO:0042025	F:DNA binding; F:protein heterodimerization activity; C:nucleosome; C:nucleus; C:host cell nucleus	0	0	0	0	0
XLOC_017656	TraesCS1D02G364600	chr1D:445386254-445387047	17.7523	403.769	4.50745	0.0286	Histone H3.2	F:GO:0003677; F:GO:0046982; C:GO:0000786; C:GO:0005634; C:GO:0010369	F:DNA binding; F:protein heterodimerization activity; C:nucleosome; C:nucleus; C:chromocenter	0	0	0	0	0
XLOC_046716	TraesCS3A02G377400	chr3A:627269391-627270074	11.5096	426.875	5.21291	0.04535	Histone H3.2	F:GO:0003677; F:GO:0046982; C:GO:0000786; C:GO:0005634; C:GO:0010369	F:DNA binding; F:protein heterodimerization activity; C:nucleosome; C:nucleus; C:chromocenter	0	0	0	0	0
XLOC_048140	TraesCS3A02G134000	chr3A:111105592-111106257	6.32944	299.149	5.56264	0.03185	Histone H3.2	F:GO:0003677; F:GO:0046982; C:GO:0000786; C:GO:0005634; C:GO:0010369	F:DNA binding; F:protein heterodimerization activity; C:nucleosome; C:nucleus; C:chromocenter	0	0	0	0	0
XLOC_145435	TraesCS7D02G116800	chr7D:71863789-71864575	5.99684	267.838	5.48102	0.0354	Histone H3.2	F:GO:0003677; F:GO:0046982; C:GO:0000786; C:GO:0005634; C:GO:0010369	F:DNA binding; F:protein heterodimerization activity; C:nucleosome; C:nucleus; C:chromocenter	0	0	0	0	0
XLOC_070179	TraesCS4A02G402000	chr4A:675854877-675855520	5.80367	244.434	5.39633	0.0398	Histone H3.2	F:GO:0003677; F:GO:0046982; C:GO:0000786; C:GO:0005634; C:GO:0010369	F:DNA binding; F:protein heterodimerization activity; C:nucleosome; C:nucleus; C:chromocenter	0	0	0	0	0
XLOC_142643	TraesCS7D02G116600	chr7D:71812504-71813150	5.75814	316.611	5.78097	0.0317	Histone H3.2	F:GO:0003677; F:GO:0046982; C:GO:0000786; C:GO:0005634; C:GO:0010369	F:DNA binding; F:protein heterodimerization activity; C:nucleosome; C:nucleus; C:chromocenter	0	0	0	0	0
XLOC_137366	TraesCS7B02G016900	chr7B:14787944-14788571	4.66092	166.971	5.16284	0.0435	Histone H3.2	F:GO:0003677; F:GO:0046982; C:GO:0000786; C:GO:0005634; C:GO:0010369	F:DNA binding; F:protein heterodimerization activity; C:nucleosome; C:nucleus; C:chromocenter	0	0	0	0	0
XLOC_001746	TraesCS1A02G360000	chr1A:541381310-541382054	4.05408	174.21	5.42531	0.0374	Histone H3.2	F:GO:0003677; F:GO:0046982; C:GO:0000786; C:GO:0005634	F:DNA binding; F:protein heterodimerization activity; C:nucleosome; C:nucleus	0	0	0	0	0
XLOC_010561	TraesCS1B02G376300	chr1B:607428651-607429589	3.76525	113.042	4.90797	0.0496	Histone H3.2	F:GO:0003677; F:GO:0046982; C:GO:0000786; C:GO:0005634	F:DNA binding; F:protein heterodimerization activity; C:nucleosome; C:nucleus	0	0	0	0	0
XLOC_028775	TraesCS2B02G186000	chr2B:161026405-161027144	3.74052	127.209	5.08782	0.04645	Histone H3.2	F:GO:0003677; F:GO:0046982; C:GO:0000786; C:GO:0005634; C:GO:0010369	F:DNA binding; F:protein heterodimerization activity; C:nucleosome; C:nucleus; C:chromocenter	0	0	0	0	0
XLOC_015429	TraesCS1D02G364200	chr1D:445317522-445318303	3.43654	129.528	5.23616	0.04165	Histone H3.2	F:GO:0003677; F:GO:0046982; C:GO:0000786; C:GO:0005634; C:GO:0010369	F:DNA binding; F:protein heterodimerization activity; C:nucleosome; C:nucleus; C:chromocenter	0	0	0	0	0
XLOC_142567	TraesCS7D02G096900	chr7D:58768352-58769045	3.15548	268.789	6.41247	0.02	Histone H3.2	F:GO:0003677; F:GO:0046982; C:GO:0000786; C:GO:0005634; C:GO:0010369	F:DNA binding; F:protein heterodimerization activity; C:nucleosome; C:nucleus; C:chromocenter	0	0	0	0	0
XLOC_010103	TraesCS1B02G283700	chr1B:492368376-492369112	3.04729	74.7638	4.61674	0.02025	Histone H3.2	F:GO:0003677; F:GO:0046982; C:GO:0000786; C:GO:0005634	F:DNA binding; F:protein heterodimerization activity; C:nucleosome; C:nucleus	0	0	0	0	0
XLOC_144190	TraesCS7D02G432000	chr7D:551737691-551738568	2.60822	76.9985	4.88369	0.01695	histone H3	F:GO:0003677; F:GO:0046982; C:GO:0000786; C:GO:0005634	F:DNA binding; F:protein heterodimerization activity; C:nucleosome; C:nucleus	0	0	0	0	0
XLOC_057162	TraesCS3B02G390000	chr3B:613811304-613811952	3.96566	60.6277	3.93435	0.0326	histone H2B.5	P:GO:0006334; F:GO:0003677; F:GO:0046982; C:GO:0000786; C:GO:0005634	P:nucleosome assembly; F:DNA binding; F:protein heterodimerization activity; C:nucleosome; C:nucleus	0	0	AT1G07790	HTB1	Histone H2B.1 [Source:UniProtKB/Swiss-Prot;Acc:Q9LQQ4]
XLOC_114868	TraesCS6B02G082600	chr6B:59298977-59299719	4.60205	172.406	5.22739	0.0427	Histone H2B.4	P:GO:0006334; F:GO:0003677; F:GO:0046982; C:GO:0000786; C:GO:0005634	P:nucleosome assembly; F:DNA binding; F:protein heterodimerization activity; C:nucleosome; C:nucleus	0	0	AT1G07790	HTB1	Histone H2B.1 [Source:UniProtKB/Swiss-Prot;Acc:Q9LQQ4]
XLOC_117366	TraesCS6B02G116000	chr6B:101325195-101325603	10.4773	347.718	5.05258	0.04495	histone H2B.3-like	P:GO:0006334; F:GO:0003677; F:GO:0046982; C:GO:0000786; C:GO:0005634	P:nucleosome assembly; F:DNA binding; F:protein heterodimerization activity; C:nucleosome; C:nucleus	0	0	AT1G07790	HTB1	Histone H2B.1 [Source:UniProtKB/Swiss-Prot;Acc:Q9LQQ4]
XLOC_144421	TraesCS7D02G477400	chr7D:588540888-588541576	5.58718	279.238	5.64323	0.0355	histone H2B.3-like	F:GO:0003677; F:GO:0046982; C:GO:0000786; C:GO:0005634	F:DNA binding; F:protein heterodimerization activity; C:nucleosome; C:nucleus	0	0	AT1G07790	HTB1	Histone H2B.1 [Source:UniProtKB/Swiss-Prot;Acc:Q9LQQ4]
XLOC_150023	TraesCSU02G077200	chrUn:69362273-69362890	4.31349	181.476	5.39478	0.0353	histone H2B.3-like	P:GO:0006334; F:GO:0003677; F:GO:0046982; C:GO:0000786; C:GO:0005634	P:nucleosome assembly; F:DNA binding; F:protein heterodimerization activity; C:nucleosome; C:nucleus	0	0	AT1G07790	HTB1	Histone H2B.1 [Source:UniProtKB/Swiss-Prot;Acc:Q9LQQ4]
XLOC_151425	TraesCSU02G077400	chrUn:69443757-69444521	3.38423	131.196	5.27675	0.04125	histone H2B.3-like	P:GO:0006334; F:GO:0003677; F:GO:0046982; C:GO:0000786; C:GO:0005634	P:nucleosome assembly; F:DNA binding; F:protein heterodimerization activity; C:nucleosome; C:nucleus	0	0	AT1G07790	HTB1	Histone H2B.1 [Source:UniProtKB/Swiss-Prot;Acc:Q9LQQ4]
XLOC_110967	TraesCS6A02G034500	chr6A:16655030-16655791	4.0856	131.613	5.00961	0.04815	histone H2B.2-like	P:GO:0006334; F:GO:0003677; F:GO:0046982; C:GO:0000786; C:GO:0005634	P:nucleosome assembly; F:DNA binding; F:protein heterodimerization activity; C:nucleosome; C:nucleus	0	0	AT1G07790	HTB1	Histone H2B.1 [Source:UniProtKB/Swiss-Prot;Acc:Q9LQQ4]
XLOC_017804	TraesCS1D02G396600	chr1D:464801852-464802597	3.69386	89.7752	4.60312	0.02315	histone H2B.2-like	P:GO:0006334; F:GO:0003677; F:GO:0046982; C:GO:0000786; C:GO:0005634	P:nucleosome assembly; F:DNA binding; F:protein heterodimerization activity; C:nucleosome; C:nucleus	0	0	AT1G07790	HTB1	Histone H2B.1 [Source:UniProtKB/Swiss-Prot;Acc:Q9LQQ4]
XLOC_001754	TraesCS1A02G361600	chr1A:542167993-542168455	8.09395	182.486	4.4948	0.0245	Histone H2B.2	P:GO:0006334; F:GO:0003677; F:GO:0046982; C:GO:0000786; C:GO:0005634	P:nucleosome assembly; F:DNA binding; F:protein heterodimerization activity; C:nucleosome; C:nucleus	0	0	AT1G07790	HTB1	Histone H2B.1 [Source:UniProtKB/Swiss-Prot;Acc:Q9LQQ4]
XLOC_008269	TraesCS1B02G386600	chr1B:620900109-620900571	6.38996	59.6039	3.22153	0.0288	Histone H2B.2	P:GO:0006334; F:GO:0003677; F:GO:0046982; C:GO:0000786; C:GO:0005634	P:nucleosome assembly; F:DNA binding; F:protein heterodimerization activity; C:nucleosome; C:nucleus	0	0	AT1G07790	HTB1	Histone H2B.1 [Source:UniProtKB/Swiss-Prot;Acc:Q9LQQ4]
XLOC_015441	TraesCS1D02G366300	chr1D:446434728-446435510	6.04317	283.57	5.55226	0.0356	Histone H2B.2	P:GO:0006334; F:GO:0003677; F:GO:0046982; C:GO:0000786; C:GO:0005634	P:nucleosome assembly; F:DNA binding; F:protein heterodimerization activity; C:nucleosome; C:nucleus	0	0	AT1G07790	HTB1	Histone H2B.1 [Source:UniProtKB/Swiss-Prot;Acc:Q9LQQ4]
XLOC_110999	TraesCS6A02G040500	chr6A:21137210-21137839	5.33072	94.1566	4.14266	0.03325	Histone H2B.2	P:GO:0006334; F:GO:0003677; F:GO:0046982; C:GO:0000786; C:GO:0005634	P:nucleosome assembly; F:DNA binding; F:protein heterodimerization activity; C:nucleosome; C:nucleus	0	0	AT1G07790	HTB1	Histone H2B.1 [Source:UniProtKB/Swiss-Prot;Acc:Q9LQQ4]
XLOC_008267	TraesCS1B02G386400	chr1B:620551599-620552359	3.75269	202.463	5.75359	0.03095	Histone H2B.2	P:GO:0006334; F:GO:0003677; F:GO:0046982; C:GO:0000786; C:GO:0005634	P:nucleosome assembly; F:DNA binding; F:protein heterodimerization activity; C:nucleosome; C:nucleus	0	0	AT1G07790	HTB1	Histone H2B.1 [Source:UniProtKB/Swiss-Prot;Acc:Q9LQQ4]
XLOC_083838	TraesCS4D02G205300	chr4D:352755069-352755519	7.64658	71.6191	3.22746	0.0286	histone H2B.1	P:GO:0006334; F:GO:0003677; F:GO:0046982; C:GO:0000786; C:GO:0005634	P:nucleosome assembly; F:DNA binding; F:protein heterodimerization activity; C:nucleosome; C:nucleus	0	0	AT1G07790	HTB1	Histone H2B.1 [Source:UniProtKB/Swiss-Prot;Acc:Q9LQQ4]
XLOC_007559	TraesCS1B02G244900	chr1B:434335323-434336006	3.6346	60.0546	4.04641	0.03055	histone H2B.1	P:GO:0006334; F:GO:0003677; F:GO:0046982; C:GO:0000786; C:GO:0005634	P:nucleosome assembly; F:DNA binding; F:protein heterodimerization activity; C:nucleosome; C:nucleus	0	0	AT1G07790	HTB1	Histone H2B.1 [Source:UniProtKB/Swiss-Prot;Acc:Q9LQQ4]
XLOC_139223	TraesCS7B02G408300	chr7B:677538035-677538867	18.759	423.356	4.49622	0.0309	Histone H2AX	P:GO:0006342; F:GO:0003677; F:GO:0046982; C:GO:0000786; C:GO:0000790	P:chromatin silencing; F:DNA binding; F:protein heterodimerization activity; C:nucleosome; C:nuclear chromatin	0	0	AT1G51060	HTA10	Probable histone H2A.1 [Source:UniProtKB/Swiss-Prot;Acc:Q9C681]
XLOC_094687	TraesCS5B02G243500	chr5B:423796114-423796808	4.13194	70.2641	4.0879	0.03225	histone H2A-like	F:GO:0003677; F:GO:0046982; C:GO:0000786; C:GO:0005634	F:DNA binding; F:protein heterodimerization activity; C:nucleosome; C:nucleus	0	0	0	0	0
XLOC_131927	TraesCS7A02G438400	chr7A:632550383-632551201	4.12316	72.4558	4.13528	0.03235	histone H2A-like	F:GO:0003677; F:GO:0046982; C:GO:0000786; C:GO:0005634; C:GO:0016021	F:DNA binding; F:protein heterodimerization activity; C:nucleosome; C:nucleus; C:integral component of membrane	0	0	0	0	0
XLOC_146924	TraesCS7D02G428400	chr7D:548781403-548782109	3.44553	73.2583	4.41019	0.02405	histone H2A-like	F:GO:0003677; F:GO:0046982; C:GO:0000786; C:GO:0005634; C:GO:0016021	F:DNA binding; F:protein heterodimerization activity; C:nucleosome; C:nucleus; C:integral component of membrane	0	0	0	0	0
XLOC_114866	TraesCS6B02G082400	chr6B:59232715-59233465	3.20465	35.5415	3.47126	0.02515	histone H2A.1-like	P:GO:0006342; F:GO:0003677; F:GO:0046982; C:GO:0000786; C:GO:0000790	P:chromatin silencing; F:DNA binding; F:protein heterodimerization activity; C:nucleosome; C:nuclear chromatin	0	0	0	0	0
XLOC_143254	TraesCS7D02G246600	chr7D:215927073-215928899	6.90675	157.126	4.50777	0.03175	histone H2A variant 1	P:GO:0006342; F:GO:0003677; F:GO:0046982; C:GO:0000786; C:GO:0000790	P:chromatin silencing; F:DNA binding; F:protein heterodimerization activity; C:nucleosome; C:nuclear chromatin	0	0	AT2G38810	HTA8	Probable histone H2A variant 2 [Source:UniProtKB/Swiss-Prot;Acc:Q9SII0]
XLOC_002813	TraesCS1A02G132400	chr1A:179535749-179537296	4.13199	101.044	4.61201	0.01975	histone H2A variant 1	P:GO:0006342; F:GO:0003677; F:GO:0046982; C:GO:0000786; C:GO:0000790	P:chromatin silencing; F:DNA binding; F:protein heterodimerization activity; C:nucleosome; C:nuclear chromatin	0	0	AT2G38810	HTA8	Probable histone H2A variant 2 [Source:UniProtKB/Swiss-Prot;Acc:Q9SII0]
XLOC_006561	TraesCS1B02G049100	chr1B:28762791-28763678	33.2708	571.167	4.10158	0.03315	Histone H2A	P:GO:0006342; F:GO:0003677; F:GO:0046982; C:GO:0000786; C:GO:0000790	P:chromatin silencing; F:DNA binding; F:protein heterodimerization activity; C:nucleosome; C:nuclear chromatin	0	0	0	0	0
XLOC_000195	TraesCS1A02G038200	chr1A:21022730-21023627	15.3538	393.606	4.68009	0.025	histone H2A	P:GO:0006342; F:GO:0003677; F:GO:0046982; C:GO:0000786; C:GO:0000790	P:chromatin silencing; F:DNA binding; F:protein heterodimerization activity; C:nucleosome; C:nuclear chromatin	0	0	0	0	0
XLOC_013809	TraesCS1D02G039900	chr1D:19184951-19185867	8.83206	442.772	5.64767	0.0328	histone H2A	P:GO:0006342; F:GO:0003677; F:GO:0046982; C:GO:0000786; C:GO:0000790	P:chromatin silencing; F:DNA binding; F:protein heterodimerization activity; C:nucleosome; C:nuclear chromatin	0	0	0	0	0
XLOC_024613	TraesCS2A02G397400	chr2A:651395509-651396535	3.07613	58.0127	4.23718	0.0308	Histone H1	P:GO:0006334; P:GO:0016584; P:GO:0030261; P:GO:0031936; P:GO:0045910; F:GO:0003690; F:GO:0031492; C:GO:0000786; C:GO:0005634; C:GO:0042025	P:nucleosome assembly; P:nucleosome positioning; P:chromosome condensation; P:negative regulation of chromatin silencing; P:negative regulation of DNA recombination; F:double-stranded DNA binding; F:nucleosomal DNA binding; C:nucleosome; C:nucleus; C:host cell nucleus	0	0	0	0	0
XLOC_098496	TraesCS5B02G449000	chr5B:621397565-621399013	2.88063	105.896	5.20012	0.048	histone H1	P:GO:0006334; P:GO:0016584; P:GO:0030261; P:GO:0031936; P:GO:0045910; F:GO:0003690; F:GO:0031492; C:GO:0000786; C:GO:0005634; C:GO:0042025	P:nucleosome assembly; P:nucleosome positioning; P:chromosome condensation; P:negative regulation of chromatin silencing; P:negative regulation of DNA recombination; F:double-stranded DNA binding; F:nucleosomal DNA binding; C:nucleosome; C:nucleus; C:host cell nucleus	0	0	0	0	0
XLOC_065669	TraesCS3D02G411900	chr3D:524305738-524311285	3.25298	61.9258	4.25071	0.02885	glycine-rich cell wall structural protein 1.8-like	0	0	0	0	0	0	0
XLOC_104365	TraesCS5D02G030000	chr5D:27689523-27690891	4.45752	200.207	5.48911	0.03805	glutathione S-transferase 4	F:GO:0004364; F:GO:0043295; C:GO:0005737	F:glutathione transferase activity; F:glutathione binding; C:cytoplasm	EC:2.5.1.18	Glutathione transferase	AT3G03190	GSTF11	Glutathione S-transferase F11 [Source:UniProtKB/Swiss-Prot;Acc:Q96324]
XLOC_137847	TraesCS7B02G115300	chr7B:133791960-133792855	3.71435	63.7973	4.10231	0.0294	gibberellin-regulated protein 5-like	C:GO:0016021	C:integral component of membrane	0	0	AT5G15230	GASA4	Gibberellin-regulated protein 4 [Source:UniProtKB/Swiss-Prot;Acc:P46690]
XLOC_076890	TraesCS4B02G390000	chr4B:666331640-666332396	2.92339	47.1409	4.01126	0.0287	Fruit bromelain	P:GO:0051603; F:GO:0004197; C:GO:0005615; C:GO:0005764	P:proteolysis involved in cellular protein catabolic process; F:cysteine-type endopeptidase activity; C:extracellular space; C:lysosome	EC:3.4.22; EC:3.4.22.1; EC:3.4.99; EC:3.4.22.41; EC:3.4.22.40; EC:3.4.22.34; EC:3.4.22.8; EC:3.4.22.28; EC:3.4.22.16; EC:3.4.22.27; EC:3.4.22.38; EC:3.4.22.15; EC:3.4.22.14	Acting on peptide bonds (peptidases); Cathepsin B; Acting on peptide bonds (peptidases); Cathepsin F; Bleomycin hydrolase; Legumain; Clostripain; Picornain 3C; Cathepsin H; Cathepsin S; Cathepsin K; Cathepsin L; Actinidain	0	0	0
XLOC_029350	TraesCS2B02G311100	chr2B:445170570-445173098	4.29296	75.696	4.14017	0.0334	Ferredoxin-3, chloroplastic	P:GO:0022900; F:GO:0009055; F:GO:0046872; F:GO:0051537; C:GO:0009507; C:GO:0016021	P:electron transport chain; F:electron transfer activity; F:metal ion binding; F:2 iron, 2 sulfur cluster binding; C:chloroplast; C:integral component of membrane	0	0	0	0	0
XLOC_045373	TraesCS3A02G103100	chr3A:66907809-66908893	2.88829	44.4141	3.94273	0.0471	fasciclin-like arabinogalactan protein 11	P:GO:0009834; C:GO:0005886; C:GO:0016021	P:plant-type secondary cell wall biogenesis; C:plasma membrane; C:integral component of membrane	0	0	AT5G03170	FLA11	Fasciclin-like arabinogalactan protein 11 [Source:UniProtKB/Swiss-Prot;Acc:Q8LEJ6]
XLOC_045344	TraesCS3A02G097400	chr3A:63130940-63131851	2.61497	38.7172	3.88811	0.039	extracellular glycosidase CRH11-like	0	0	0	0	0	0	0
XLOC_122448	TraesCS6D02G176400	chr6D:172116523-172135906	3.47412	52.1271	3.90731	0.03445	early nodulin 93	C:GO:0016021	C:integral component of membrane	0	0	0	0	0
XLOC_096016	TraesCS5B02G503500	chr5B:670074565-670075465	2.66022	51.4483	4.27351	0.0298	dirigent protein 22-like	C:GO:0048046	C:apoplast	0	0	0	0	0
XLOC_094345	TraesCS5B02G172000	chr5B:316531658-316532539	15.6304	253.036	4.01691	0.04445	Dirigent protein 21	C:GO:0048046	C:apoplast	0	0	AT1G65870	DIR21	Dirigent protein 21 [Source:UniProtKB/Swiss-Prot;Acc:Q9SS03]
XLOC_038082	TraesCS2D02G263600	chr2D:322502164-322503166	3.09473	104.081	5.07174	0.04145	dirigent protein 1-like	C:GO:0016021; C:GO:0048046	C:integral component of membrane; C:apoplast	0	0	AT1G65870	DIR21	Dirigent protein 21 [Source:UniProtKB/Swiss-Prot;Acc:Q9SS03]
XLOC_024042	TraesCS2A02G274400	chr2A:450534655-450536459	3.04444	38.1916	3.64901	0.045	dCTP pyrophosphatase 1-like	P:GO:0006253; P:GO:0042262; F:GO:0000287; F:GO:0047840; C:GO:0005829	P:dCTP catabolic process; P:DNA protection; F:magnesium ion binding; F:dCTP diphosphatase activity; C:cytosol	EC:3.6.1.12; EC:3.6.1.9	dCTP diphosphatase; Nucleotide diphosphatase	0	0	0
XLOC_135650	TraesCS7B02G175500	chr7B:247243273-247246402	2.80023	38.6207	3.78576	0.03705	cytochrome c1-2, heme protein, mitochondrial	P:GO:0006122; P:GO:0042776; F:GO:0020037; F:GO:0045153; F:GO:0046872; C:GO:0005750	P:mitochondrial electron transport, ubiquinol to cytochrome c; P:mitochondrial ATP synthesis coupled proton transport; F:heme binding; F:electron transporter, transferring electrons within CoQH2-cytochrome c reductase complex activity; F:metal ion binding; C:mitochondrial respiratory chain complex III	0	0	AT3G27240	CYC11	Cytochrome c1 1, heme protein, mitochondrial [Source:UniProtKB/Swiss-Prot;Acc:Q9LK29]
XLOC_084275	TraesCS4D02G296200	chr4D:465759054-465760992	2.90794	41.4218	3.83232	0.04035	cyanate hydratase	P:GO:0009440; P:GO:0009651; F:GO:0003677; F:GO:0008824; F:GO:0042802; C:GO:0005829	P:cyanate catabolic process; P:response to salt stress; F:DNA binding; F:cyanate hydratase activity; F:identical protein binding; C:cytosol	EC:4.2.1.104	Cyanase	AT3G23490	CYN	Cyanate hydratase [Source:UniProtKB/TrEMBL;Acc:A0A178VD28]
XLOC_102193	TraesCS5D02G173000	chr5D:270241201-270244303	2.77135	32.505	3.552	0.0482	coatomer subunit zeta-2	P:GO:0006886; P:GO:0006890; P:GO:0006891; C:GO:0000139; C:GO:0030126	P:intracellular protein transport; P:retrograde vesicle-mediated transport, Golgi to endoplasmic reticulum; P:intra-Golgi vesicle-mediated transport; C:Golgi membrane; C:COPI vesicle coat	0	0	AT1G60970	0	Coatomer subunit zeta-1 [Source:UniProtKB/Swiss-Prot;Acc:Q940S5]
XLOC_032746	TraesCS2B02G369000	chr2B:526669705-526671012	14.0229	279.917	4.31914	0.02885	chitinase 5-like	P:GO:0005975; P:GO:0006032; P:GO:0016998; F:GO:0004568; F:GO:0008061	P:carbohydrate metabolic process; P:chitin catabolic process; P:cell wall macromolecule catabolic process; F:chitinase activity; F:chitin binding	EC:3.2.1.14	Chitinase	AT3G54420	EP3	EP3 [Source:UniProtKB/TrEMBL;Acc:A0A178VE44]
XLOC_117826	TraesCS6B02G214600	chr6B:289934115-289935286	3.01624	38.6047	3.67795	0.0446	CASP-like protein 2D1	F:GO:0051539; C:GO:0005886; C:GO:0016021	F:4 iron, 4 sulfur cluster binding; C:plasma membrane; C:integral component of membrane	0	0	AT5G54980	0	CASP-like protein [Source:UniProtKB/TrEMBL;Acc:A0A178UBQ1]
XLOC_128664	TraesCS7A02G333900	chr7A:487478986-487481407	7.85012	130.643	4.05677	0.0433	caffeic acid O-methyltransferase	P:GO:0009611; P:GO:0009723; P:GO:0009751; P:GO:0009809; P:GO:0009813; P:GO:0032259; P:GO:0042542; F:GO:0008171; F:GO:0008757; F:GO:0046983	P:response to wounding; P:response to ethylene; P:response to salicylic acid; P:lignin biosynthetic process; P:flavonoid biosynthetic process; P:methylation; P:response to hydrogen peroxide; F:O-methyltransferase activity; F:S-adenosylmethionine-dependent methyltransferase activity; F:protein dimerization activity	0	0	AT5G54160	OMT1	Flavone 3'-O-methyltransferase 1 [Source:UniProtKB/Swiss-Prot;Acc:Q9FK25]
XLOC_038071	TraesCS2D02G261600	chr2D:318248244-318249413	3.17995	54.3173	4.09434	0.03845	blue copper-binding protein-like	P:GO:0022900; F:GO:0009055; C:GO:0016021; C:GO:0046658	P:electron transport chain; F:electron transfer activity; C:integral component of membrane; C:anchored component of plasma membrane	0	0	0	0	0
XLOC_029198	TraesCS2B02G279700	chr2B:385888910-385890081	2.72859	55.1924	4.33824	0.0342	blue copper-binding protein-like	P:GO:0022900; F:GO:0009055; C:GO:0016021; C:GO:0046658	P:electron transport chain; F:electron transfer activity; C:integral component of membrane; C:anchored component of plasma membrane	0	0	0	0	0
XLOC_142943	TraesCS7D02G178100	chr7D:131459747-131461110	9.1786	163.643	4.15613	0.0415	blue copper protein	P:GO:0022900; F:GO:0009055; C:GO:0046658	P:electron transport chain; F:electron transfer activity; C:anchored component of plasma membrane	0	0	0	0	0
XLOC_118384	TraesCS6B02G327200	chr6B:576826072-576827367	3.63707	71.873	4.3046	0.0277	Blue copper protein	P:GO:0022900; F:GO:0009055; C:GO:0046658	P:electron transport chain; F:electron transfer activity; C:anchored component of plasma membrane	0	0	0	0	0
XLOC_024591	TraesCS2A02G392600	chr2A:642717731-642718638	3.08765	44.9992	3.86532	0.04015	Blue copper protein	P:GO:0022900; F:GO:0009055; C:GO:0016021; C:GO:0046658	P:electron transport chain; F:electron transfer activity; C:integral component of membrane; C:anchored component of plasma membrane	0	0	0	0	0
XLOC_130543	TraesCS7A02G147300	chr7A:100179726-100182321	3.6266	247.45	6.09238	0.02785	bidirectional sugar transporter SWEET15-like	P:GO:0034219; F:GO:0051119; C:GO:0005887	P:carbohydrate transmembrane transport; F:sugar transmembrane transporter activity; C:integral component of plasma membrane	0	0	AT2G39060	SWEET9	Bidirectional sugar transporter SWEET [Source:UniProtKB/TrEMBL;Acc:A0A178VR23]
XLOC_137523	TraesCS7B02G050500	chr7B:52347657-52350365	2.67678	214.074	6.32146	0.023	bidirectional sugar transporter SWEET15-like	P:GO:0034219; F:GO:0051119; C:GO:0005887	P:carbohydrate transmembrane transport; F:sugar transmembrane transporter activity; C:integral component of plasma membrane	0	0	AT2G39060	SWEET9	Bidirectional sugar transporter SWEET [Source:UniProtKB/TrEMBL;Acc:A0A178VR23]
XLOC_056126	TraesCS3B02G181300	chr3B:189488440-189490699	12.199	520.618	5.4154	0.00515	Bark storage protein A	P:GO:0009116; F:GO:0003824; C:GO:0016021	P:nucleoside metabolic process; F:catalytic activity; C:integral component of membrane	0	0	AT4G28940	0	Phosphorylase superfamily protein [Source:UniProtKB/TrEMBL;Acc:F4JM51]
XLOC_039110	TraesCS2D02G463900	chr2D:569309540-569310407	25.5025	493.073	4.27309	0.0327	BAG family molecular chaperone regulator 1-like	P:GO:0000105; F:GO:0004424; C:GO:0016021	P:histidine biosynthetic process; F:imidazoleglycerol-phosphate dehydratase activity; C:integral component of membrane	EC:4.2.1.19	Imidazoleglycerol-phosphate dehydratase	0	0	0
XLOC_022003	TraesCS2A02G463200	chr2A:709048933-709049937	15.0967	340.67	4.49607	0.0308	BAG family molecular chaperone regulator 1-like	P:GO:0000105; F:GO:0004424; C:GO:0016021	P:histidine biosynthetic process; F:imidazoleglycerol-phosphate dehydratase activity; C:integral component of membrane	EC:4.2.1.19	Imidazoleglycerol-phosphate dehydratase	0	0	0
XLOC_007719	TraesCS1B02G276200	chr1B:484146950-484147772	11.9164	526.216	5.46464	0.03455	ase inhibitor-related protein	P:GO:0010951; F:GO:0004867; C:GO:0005576	P:negative regulation of endopeptidase activity; F:serine-type endopeptidase inhibitor activity; C:extracellular region	0	0	0	0	0
XLOC_007720	TraesCS1B02G276300	chr1B:484213938-484214829	11.1099	447.909	5.33329	0.0427	ase inhibitor-related protein	P:GO:0010951; F:GO:0004867; C:GO:0005576	P:negative regulation of endopeptidase activity; F:serine-type endopeptidase inhibitor activity; C:extracellular region	0	0	0	0	0
XLOC_006497	TraesCS1B02G034100	chr1B:16478349-16479064	17.4364	673.54	5.27158	0.04575	ase inhibitor	P:GO:0009611; P:GO:0010951; F:GO:0004867	P:response to wounding; P:negative regulation of endopeptidase activity; F:serine-type endopeptidase inhibitor activity	0	0	0	0	0
XLOC_086797	TraesCS5A02G138400	chr5A:310968713-310977053	17.5846	491.066	4.80353	0.0066	alpha-L-arabinofuranosidase 1-like	P:GO:0046373; F:GO:0046556	P:L-arabinose metabolic process; F:alpha-L-arabinofuranosidase activity	EC:3.2.1.55	Non-reducing end alpha-L-arabinofuranosidase	AT3G10740	ASD1	Alpha-L-arabinofuranosidase 1 [Source:UniProtKB/TrEMBL;Acc:A0A1I9LPN8]
XLOC_102096	TraesCS5D02G152100	chr5D:241244370-241251912	6.71757	156.004	4.5375	0.00845	alpha-L-arabinofuranosidase 1-like	P:GO:0046373; F:GO:0046556	P:L-arabinose metabolic process; F:alpha-L-arabinofuranosidase activity	EC:3.2.1.55	Non-reducing end alpha-L-arabinofuranosidase	AT3G10740	ASD1	Alpha-L-arabinofuranosidase 1 [Source:UniProtKB/TrEMBL;Acc:A0A1I9LPN8]
XLOC_069669	TraesCS4A02G296300	chr4A:596523170-596523860	33.5644	647.236	4.26929	0.0301	alpha-amylase/trypsin inhibitor	P:GO:0006952; C:GO:0005576; C:GO:0016021	P:defense response; C:extracellular region; C:integral component of membrane	0	0	AT4G11650	OSM34	OSM34 [Source:UniProtKB/TrEMBL;Acc:A0A178V0T2]
XLOC_022139	TraesCS2A02G489600	chr2A:723518734-723521747	4.48056	32.622	2.8641	0.0307	adenosylhomocysteinase	P:GO:0000463; P:GO:0006730; P:GO:0033353; F:GO:0003723; F:GO:0003735; F:GO:0004013; C:GO:0022625	P:maturation of LSU-rRNA from tricistronic rRNA transcript (SSU-rRNA, 5.8S rRNA, LSU-rRNA); P:one-carbon metabolic process; P:S-adenosylmethionine cycle; F:RNA binding; F:structural constituent of ribosome; F:adenosylhomocysteinase activity; C:cytosolic large ribosomal subunit	EC:3.3.1.1	Adenosylhomocysteinase	AT3G23810	SAHH2	Adenosylhomocysteinase [Source:UniProtKB/TrEMBL;Acc:A0A178VEP9]
XLOC_033453	TraesCS2B02G521600	chr2B:716593324-716595982	4.02677	153.097	5.24867	0.007	adenosylhomocysteinase	P:GO:0000463; P:GO:0006730; P:GO:0033353; F:GO:0003723; F:GO:0003735; F:GO:0004013; C:GO:0022625	P:maturation of LSU-rRNA from tricistronic rRNA transcript (SSU-rRNA, 5.8S rRNA, LSU-rRNA); P:one-carbon metabolic process; P:S-adenosylmethionine cycle; F:RNA binding; F:structural constituent of ribosome; F:adenosylhomocysteinase activity; C:cytosolic large ribosomal subunit	EC:3.3.1.1	Adenosylhomocysteinase	AT3G23810	SAHH2	Adenosylhomocysteinase [Source:UniProtKB/TrEMBL;Acc:A0A178VEP9]
XLOC_042173	TraesCS2D02G493500	chr2D:590988400-590990772	2.58414	97.0127	5.23042	0.04895	adenosylhomocysteinase	P:GO:0000463; P:GO:0006730; P:GO:0033353; F:GO:0003723; F:GO:0003735; F:GO:0004013; C:GO:0022625	P:maturation of LSU-rRNA from tricistronic rRNA transcript (SSU-rRNA, 5.8S rRNA, LSU-rRNA); P:one-carbon metabolic process; P:S-adenosylmethionine cycle; F:RNA binding; F:structural constituent of ribosome; F:adenosylhomocysteinase activity; C:cytosolic large ribosomal subunit	EC:3.3.1.1	Adenosylhomocysteinase	AT3G23810	SAHH2	Adenosylhomocysteinase [Source:UniProtKB/TrEMBL;Acc:A0A178VEP9]
XLOC_081578	TraesCS4D02G109500	chr4D:88700543-88701453	11.5434	1506.87	7.02834	0.015	abcissic acid stress ripening	0	0	0	0	0	0	0
XLOC_138450	TraesCS7B02G243300	chr7B:451363625-451364381	2.75143	42.6181	3.95322	0.03145	60S ribosomal protein L27	P:GO:0006412; F:GO:0003735; C:GO:0022625	P:translation; F:structural constituent of ribosome; C:cytosolic large ribosomal subunit	0	0	AT2G32220	RPL27A	60S ribosomal protein L27-1 [Source:UniProtKB/Swiss-Prot;Acc:Q9SKX8]
XLOC_054283	TraesCS3B02G405000	chr3B:640655738-640659051	22.5246	289.328	3.68313	0.04655	60S ribosomal protein L10a-1	P:GO:0000470; P:GO:0006412; F:GO:0003723; F:GO:0003735; C:GO:0022625	P:maturation of LSU-rRNA; P:translation; F:RNA binding; F:structural constituent of ribosome; C:cytosolic large ribosomal subunit	0	0	AT1G08360	RPL10AA	60S ribosomal protein L10a-1 [Source:UniProtKB/Swiss-Prot;Acc:Q8VZB9]
XLOC_046690	TraesCS3A02G372600	chr3A:623187064-623190382	11.8379	248.982	4.39456	0.00505	60S ribosomal protein L10a-1	P:GO:0000470; P:GO:0006412; F:GO:0003723; F:GO:0003735; C:GO:0022625	P:maturation of LSU-rRNA; P:translation; F:RNA binding; F:structural constituent of ribosome; C:cytosolic large ribosomal subunit	0	0	AT1G08360	RPL10AA	60S ribosomal protein L10a-1 [Source:UniProtKB/Swiss-Prot;Acc:Q8VZB9]
XLOC_056866	TraesCS3B02G332600	chr3B:539067367-539068162	3.38424	41.031	3.59981	0.03925	50S ribosomal protein L33	P:GO:0000027; P:GO:0006412; F:GO:0003735; C:GO:0015934; C:GO:0016021	P:ribosomal large subunit assembly; P:translation; F:structural constituent of ribosome; C:large ribosomal subunit; C:integral component of membrane	0	0	AT3G06320	0	At3g06320 [Source:UniProtKB/TrEMBL;Acc:Q9SQT5]
XLOC_015209	TraesCS1D02G319400	chr1D:413577518-413579164	2.87463	40.7572	3.82561	0.0396	22.3 kDa class VI heat shock protein	0	0	0	0	AT5G54660	HSP21.7	21.7 kDa class VI heat shock protein [Source:UniProtKB/Swiss-Prot;Acc:Q9FIT9]
XLOC_129027	TraesCS7A02G406500	chr7A:591879772-591880717	2.60857	54.2415	4.37806	0.0274	21 kDa protein	P:GO:0043086; F:GO:0004857	P:negative regulation of catalytic activity; F:enzyme inhibitor activity	0	0	AT1G62770	PMEI9	Pectinesterase inhibitor 9 [Source:UniProtKB/Swiss-Prot;Acc:Q9SI72]
XLOC_029548	TraesCS2B02G347100	chr2B:493977569-493988650	4.56886	468.484	6.68002	0.0163	RNA-dependent RNA polymerase [Source:UniProtKB/TrEMBL;Acc:A0A1D5TZH3]					AT4G11130	RDR2	RNA-dependent RNA polymerase 2 [Source:UniProtKB/Swiss-Prot;Acc:O82504]
XLOC_031294	TraesCS2B02G075700	chr2B:41113829-41119970	2.4326	57.3957	4.56037	0.0259	0					0	0	0
XLOC_007834	TraesCS1B02G301000	chr1B:521766876-521767839	2.42035	102.67	5.40665	0.03885	Histone H4 variant TH011 [Source:UniProtKB/Swiss-Prot;Acc:P62785]					0	0	0
XLOC_109172	TraesCS6A02G094300	chr6A:61411742-61412742	2.41356	96.7002	5.32429	0.03705	Chlorophyll a-b binding protein, chloroplastic [Source:UniProtKB/TrEMBL;Acc:A0A1D6AFU1]					AT1G29910	LHCB1.1	Chlorophyll a-b binding protein 3, chloroplastic [Source:UniProtKB/Swiss-Prot;Acc:Q8VZ87]
XLOC_056876	TraesCS3B02G334200	chr3B:540475680-540477104	2.33549	42.5887	4.18868	0.03125	0					AT1G13830	0	Carbohydrate-binding X8 domain superfamily protein [Source:TAIR;Acc:AT1G13830]
XLOC_025039	TraesCS2A02G493600	chr2A:725991547-725994243	2.26396	122.95	5.76308	0.03125	Adenosylhomocysteinase [Source:UniProtKB/TrEMBL;Acc:A0A1D5UKX4]					AT3G23810	SAHH2	Adenosylhomocysteinase [Source:UniProtKB/TrEMBL;Acc:A0A178VEP9]
XLOC_008270	TraesCS1B02G386700	chr1B:621059259-621060089	2.24205	39.9688	4.15598	0.02155	Histone H2B [Source:UniProtKB/TrEMBL;Acc:W5A7K6]					AT1G07790	HTB1	Histone H2B.1 [Source:UniProtKB/Swiss-Prot;Acc:Q9LQQ4]
XLOC_078233	TraesCS4B02G263500	chr4B:534404009-534408924	2.23483	38.0468	4.08954	0.0335	CASP-like protein [Source:UniProtKB/TrEMBL;Acc:A0A1D5XMH2]					AT2G35760	0	CASP-like protein 2B2 [Source:UniProtKB/Swiss-Prot;Acc:Q8L924]
XLOC_102002	TraesCS5D02G132600	chr5D:211206887-211216001	2.20969	13.881	2.6512	0.0498	0					0	0	0
XLOC_090335	TraesCS5A02G308500	chr5A:521008056-521009170	2.20467	25.6791	3.54196	0.04785	0					0	0	0
XLOC_128635	TraesCS7A02G327200	chr7A:475589501-475590624	2.19563	44.9959	4.35709	0.0277	0					AT2G35960	NHL12	NDR1/HIN1-like protein 12 [Source:UniProtKB/Swiss-Prot;Acc:Q9SJ54]
XLOC_048333	TraesCS3A02G176000	chr3A:196419553-196420743	2.18488	27.4711	3.65229	0.04495	0					0	0	0
XLOC_127888	TraesCS7A02G176800	chr7A:130222714-130223902	2.16095	115.689	5.74244	0.03145	0					0	0	0
XLOC_002399	TraesCS1A02G048700	chr1A:30196595-30197675	2.15671	83.8945	5.28167	0.0404	0					0	0	0
XLOC_124669	TraesCS6D02G224500	chr6D:316411063-316412152	2.15282	101.474	5.55874	0.03325	0					0	0	0
XLOC_128894	TraesCS7A02G383900	chr7A:559361230-559363197	2.14496	153.76	6.16359	0.02625	Alpha-amylase [Source:UniProtKB/TrEMBL;Acc:A0A1D6D7Y1]					AT4G25000	AMY1	Alpha-amylase 1 [Source:UniProtKB/Swiss-Prot;Acc:Q8VZ56]
XLOC_127173	TraesCS7A02G027100	chr7A:10884450-10885595	2.14397	29.2768	3.7714	0.03625	0					AT2G38740	SGPP	Haloacid dehalogenase-like hydrolase domain-containing protein Sgpp [Source:UniProtKB/Swiss-Prot;Acc:Q9ZVJ5]
XLOC_122619	TraesCS6D02G212900	chr6D:302037058-302040674	2.11249	70.2711	5.05591	0.04245	Aquaporin 7 [Source:UniProtKB/TrEMBL;Acc:G3E8E1]					AT2G37170	PIP2B	plasma membrane intrinsic protein 2 [Source:TAIR;Acc:AT2G37170]
XLOC_028114	TraesCS2B02G050400	chr2B:24912401-24914422	2.09745	26.7638	3.67358	0.0349	0					AT3G17210	HS1	Stress-response A/B barrel domain-containing protein HS1 [Source:UniProtKB/Swiss-Prot;Acc:Q9LUV2]
XLOC_061838	TraesCS3D02G165500	chr3D:137477406-137483686	2.08342	22.9602	3.46211	0.03545	Reticulon-like protein [Source:UniProtKB/TrEMBL;Acc:A0A1D5WV77]					AT5G58000	0	Reticulon-like protein [Source:UniProtKB/TrEMBL;Acc:A0A178UL80]
XLOC_029792	TraesCS2B02G400200	chr2B:568634682-568635849	2.07158	31.6078	3.93148	0.03245	CASP-like protein [Source:UniProtKB/TrEMBL;Acc:A0A1D5U5A5]					AT2G27370	CASP3	Casparian strip membrane protein 3 [Source:UniProtKB/Swiss-Prot;Acc:Q9ZQI2]
XLOC_030242	TraesCS2B02G484900	chr2B:682138406-682139715	2.05075	150.859	6.20091	0.0245	0					0	0	0
XLOC_006775	TraesCS1B02G086500	chr1B:72696307-72697290	2.04338	15.4208	2.91585	0.03445	0					0	0	0
XLOC_001344	TraesCS1A02G273500	chr1A:467184517-467186314	2.04066	32.4067	3.98919	0.0373	0					AT1G01050	PPA1	Soluble inorganic pyrophosphatase 1 [Source:UniProtKB/Swiss-Prot;Acc:Q93V56]
XLOC_104897	TraesCS5D02G145400	chr5D:232135796-232137209	2.02115	44.6756	4.46624	0.02645	0					0	0	0
XLOC_083776	TraesCS4D02G193300	chr4D:336537552-336542654	2.00463	41.457	4.37021	0.0211	0					AT3G06310	0	NADH dehydrogenase [ubiquinone] 1 alpha subcomplex subunit 8-A [Source:UniProtKB/Swiss-Prot;Acc:Q9SQT4]
XLOC_084190	TraesCS4D02G278800	chr4D:450153238-450157092	1.98579	16.4858	3.05343	0.03165	Mitochondrial fission 1 protein [Source:UniProtKB/TrEMBL;Acc:A0A1D5Y2V0]					AT3G57090	FIS1A	Mitochondrial fission 1 protein A [Source:UniProtKB/Swiss-Prot;Acc:Q9M1J1]
XLOC_075575	TraesCS4B02G107000	chr4B:116955153-116956060	1.97343	12.2225	2.63076	0.0428	Dirigent protein [Source:UniProtKB/TrEMBL;Acc:W5ECD6]					0	0	0
XLOC_131050	TraesCS7A02G247800	chr7A:228851070-228852215	1.92017	22.1359	3.52708	0.0495	0					0	0	0
XLOC_022596	TraesCS2A02G578400	chr2A:771712790-771715174	1.89478	50.7703	4.74388	0.035	0					AT1G17170	GSTU24	Glutathione S-transferase U24 [Source:UniProtKB/Swiss-Prot;Acc:Q9SHH6]
XLOC_048740	TraesCS3A02G260200	chr3A:482935817-482937066	1.88911	26.666	3.81923	0.0412	Chitinase 3 [Source:UniProtKB/TrEMBL;Acc:Q8W427]					0	0	0
XLOC_089860	TraesCS5A02G208100	chr5A:420238490-420239743	1.88146	22.6777	3.59135	0.0467	0					0	0	0
XLOC_030275	TraesCS2B02G490700	chr2B:688430629-688434145	1.87463	32.8357	4.13059	0.0391	0					0	0	0
XLOC_111980	TraesCS6A02G242500	chr6A:454348531-454349733	1.85656	90.9468	5.61432	0.0308	0					0	0	0
XLOC_131691	TraesCS7A02G383200	chr7A:558108530-558110682	1.85282	63.8376	5.10661	0.0496	Alpha-amylase [Source:UniProtKB/TrEMBL;Acc:A0A1D6DCC7]					AT4G25000	AMY1	Alpha-amylase 1 [Source:UniProtKB/Swiss-Prot;Acc:Q8VZ56]
XLOC_088752	TraesCS5A02G532300	chr5A:689944467-689947669	1.84416	36.5133	4.30739	0.03025	0					AT5G24770	VSP2	Vegetative storage protein 2 [Source:UniProtKB/Swiss-Prot;Acc:O82122]
XLOC_025421	TraesCS2A02G571500	chr2A:768305510-768306879	1.83698	57.7713	4.97495	0.0479	Peroxidase [Source:UniProtKB/TrEMBL;Acc:A0A1D6RK35]					0	0	0
XLOC_033501	TraesCS2B02G532600	chr2B:728397379-728398594	1.83182	46.8991	4.67821	0.0197	0					0	0	0
XLOC_090910	TraesCS5A02G433100	chr5A:616981522-616982602	1.81526	32.0765	4.14327	0.022	0					0	0	0
XLOC_098165	TraesCS5B02G372900	chr5B:550745491-550750265	1.787	21.2386	3.57108	0.03955	Glutamyl-tRNA(Gln) amidotransferase subunit C, chloroplastic/mitochondrial [Source:UniProtKB/TrEMBL;Acc:W5FAI6]					0	0	0
XLOC_014006	TraesCS1D02G076600	chr1D:58756713-58758369	1.76948	38.6792	4.45016	0.02695	0					AT1G68090	ANN5	Annexin D5 [Source:UniProtKB/Swiss-Prot;Acc:Q9C9X3]
XLOC_143768	TraesCS7D02G345300	chr7D:443317121-443319309	1.76916	25.1815	3.83123	0.03405	0					AT1G13380	0	Expressed protein [Source:UniProtKB/TrEMBL;Acc:Q9FX59]
XLOC_088751	TraesCS5A02G532200	chr5A:689933098-689935992	1.75872	70.8624	5.33242	0.03985	0					AT5G24770	VSP2	Vegetative storage protein 2 [Source:UniProtKB/Swiss-Prot;Acc:O82122]
XLOC_095351	TraesCS5B02G375400	chr5B:552840231-552843935	1.75297	25.1286	3.84146	0.04025	0					AT3G11800	0	Expp1 protein [Source:UniProtKB/TrEMBL;Acc:Q94AI8]
XLOC_040718	TraesCS2D02G180900	chr2D:125343482-125345105	1.74034	25.1308	3.85201	0.0418	0					0	0	0
XLOC_087107	TraesCS5A02G203400	chr5A:412913324-412916008	1.73285	77.5312	5.48356	0.0351	0					AT2G01770	VIT1	Vacuolar iron transporter 1 [Source:UniProtKB/Swiss-Prot;Acc:Q9ZUA5]
XLOC_046333	TraesCS3A02G303200	chr3A:537507386-537509322	1.71545	27.7941	4.01812	0.04055	0					0	0	0
XLOC_064141	TraesCS3D02G104400	chr3D:56878885-56880123	1.69921	30.0355	4.14373	0.0295	0					AT3G27890	NQR	NQR [Source:UniProtKB/TrEMBL;Acc:A0A384KSW6]
XLOC_103748	TraesCS5D02G478200	chr5D:517054083-517055294	1.69699	21.8215	3.6847	0.04495	0					0	0	0
XLOC_056979	TraesCS3B02G353700	chr3B:564201644-564202851	1.6818	26.3555	3.97003	0.03125	0					0	0	0
XLOC_020365	TraesCS2A02G141900	chr2A:87460410-87462561	1.67201	98.6507	5.88267	0.0296	0					0	0	0
XLOC_046280	TraesCS3A02G292500	chr3A:523157849-523159024	1.67122	31.5597	4.23911	0.02735	0					0	0	0
XLOC_001286	TraesCS1A02G261900	chr1A:456650947-456652182	1.65503	166.749	6.65468	0.02095	Histone H3 [Source:UniProtKB/TrEMBL;Acc:A0A077RTJ8]					0	0	0
XLOC_123014	TraesCS6D02G296500	chr6D:407828659-407829804	1.65426	10.0696	2.60575	0.04365	EPIDERMAL PATTERNING FACTOR-like protein 1 [Source:UniProtKB/TrEMBL;Acc:W5GX91]					0	0	0
XLOC_069800	TraesCS4A02G323700	chr4A:611579450-611583237	1.65051	21.2706	3.68788	0.0263	0					0	0	0
XLOC_076560	TraesCS4B02G319800	chr4B:610561862-610563584	1.64122	36.4366	4.47255	0.024	0					0	0	0
XLOC_000374	TraesCS1A02G073900	chr1A:57634277-57635926	1.63883	30.8671	4.23533	0.02695	0					AT1G68090	ANN5	Annexin D5 [Source:UniProtKB/Swiss-Prot;Acc:Q9C9X3]
XLOC_143030	TraesCS7D02G199400	chr7D:156455273-156456366	1.63253	37.231	4.51133	0.0208	Chlorophyll a-b binding protein, chloroplastic [Source:UniProtKB/TrEMBL;Acc:W5IBR5]					AT1G29910	LHCB1.1	Chlorophyll a-b binding protein 3, chloroplastic [Source:UniProtKB/Swiss-Prot;Acc:Q8VZ87]
XLOC_128618	TraesCS7A02G324500	chr7A:471817252-471818397	1.63215	24.9029	3.93147	0.0308	0					AT3G02430	DMP5	Protein DMP5 [Source:UniProtKB/Swiss-Prot;Acc:Q9M897]
XLOC_020659	TraesCS2A02G199600	chr2A:171966412-171967874	1.62374	24.6328	3.92319	0.0378	Polygalacturonase-inhibiting protein, Inhibitor of fungal polygalacturonase, Regulation of floral organ numbe [Source: Projected from Oryza sativa (Os07g0568700)]					0	0	0
XLOC_010373	TraesCS1B02G336000	chr1B:562888964-562898423	1.60101	22.2752	3.79838	0.0438	Secretory carrier-associated membrane protein [Source:UniProtKB/TrEMBL;Acc:W5A2E4]					0	0	0
XLOC_078571	TraesCS4B02G330900	chr4B:621678744-621680030	1.59397	56.8511	5.15649	0.01905	0					0	0	0
XLOC_091112	TraesCS5A02G473100	chr5A:649627983-649631417	1.59139	111.872	6.13542	0.0119	0					AT2G40320	TBL33	TBL33 [Source:UniProtKB/TrEMBL;Acc:A0A178VXJ7]
XLOC_095809	TraesCS5B02G461500	chr5B:637143707-637145686	1.58402	13.5568	3.09736	0.0311	0					0	0	0
XLOC_071147	TraesCS4A02G104300	chr4A:117703711-117705630	1.5826	25.1148	3.98817	0.0322	0					AT3G55040	GSTL2	Glutathione S-transferase L2, chloroplastic [Source:UniProtKB/Swiss-Prot;Acc:Q9M2W2]
XLOC_016909	TraesCS1D02G215100	chr1D:300325359-300326913	1.58169	61.103	5.27171	0.01885	0					AT1G65680	EXPB2	Putative expansin-B2 [Source:UniProtKB/Swiss-Prot;Acc:Q9SHY6]
XLOC_145498	TraesCS7D02G132400	chr7D:83754486-83755768	1.5786	23.0732	3.8695	0.03775	0					0	0	0
XLOC_143870	TraesCS7D02G367700	chr7D:475873637-475875525	1.56486	19.1936	3.61652	0.0458	0					AT3G24520	HSFC1	Heat stress transcription factor C-1 [Source:UniProtKB/Swiss-Prot;Acc:Q9LV52]
XLOC_122039	TraesCS6D02G099100	chr6D:62270380-62272380	1.51836	28.0825	4.20909	0.0209	0					AT1G13830	0	Carbohydrate-binding X8 domain superfamily protein [Source:TAIR;Acc:AT1G13830]
XLOC_116162	TraesCS6B02G349500	chr6B:614311733-614313383	1.51415	22.0895	3.86678	0.0382	Alpha-amylase [Source:UniProtKB/TrEMBL;Acc:A0A341X438]					AT4G25000	AMY1	Alpha-amylase 1 [Source:UniProtKB/Swiss-Prot;Acc:Q8VZ56]
XLOC_139246	TraesCS7B02G412100	chr7B:680161446-680163224	1.51185	18.8124	3.63729	0.0418	0					AT3G50360	CML20	Probable calcium-binding protein CML20 [Source:UniProtKB/Swiss-Prot;Acc:O82659]
XLOC_014369	TraesCS1D02G149700	chr1D:206099674-206101382	1.50537	75.667	5.65148	0.03185	0					0	0	0
XLOC_055471	TraesCS3B02G042800	chr3B:22129255-22130588	1.50326	17.414	3.53408	0.04855	0					AT5G48430	0	At5g48430 [Source:UniProtKB/TrEMBL;Acc:Q9LV70]
XLOC_070859	TraesCS4A02G043000	chr4A:36174956-36179061	1.50151	15.8521	3.40019	0.02645	CASP-like protein [Source:UniProtKB/TrEMBL;Acc:A0A341TGB4]					AT2G35760	0	CASP-like protein 2B2 [Source:UniProtKB/Swiss-Prot;Acc:Q8L924]
XLOC_111756	TraesCS6A02G198500	chr6A:306046385-306047718	1.49796	16.9452	3.4998	0.0397	0					AT3G27280	PHB4	Prohibitin-4, mitochondrial [Source:UniProtKB/Swiss-Prot;Acc:Q9LK25]
XLOC_057649	TraesCS3B02G490400	chr3B:736665139-736666452	1.49619	16.8231	3.49107	0.0262	0					AT3G03190	GSTF11	Glutathione S-transferase F11 [Source:UniProtKB/Swiss-Prot;Acc:Q96324]
XLOC_130092	TraesCS7A02G055400	chr7A:26768373-26770100	1.47404	21.9219	3.89453	0.0405	0					AT5G07220	BAG3	BAG family molecular chaperone regulator 3 [Source:UniProtKB/Swiss-Prot;Acc:Q9LYP4]
XLOC_056207	TraesCS3B02G198200	chr3B:225463856-225465355	1.45686	19.1871	3.7192	0.04045	0					0	0	0
XLOC_150882	TraesCSU02G242700	chrUn:363600197-363601421	1.44505	21.0201	3.86258	0.0225	0					0	0	0
XLOC_016973	TraesCS1D02G229000	chr1D:317120392-317121537	1.44013	37.0579	4.68551	0.01955	0					0	0	0
XLOC_045542	TraesCS3A02G136100	chr3A:113709768-113714514	1.41386	21.6703	3.93801	0.0382	0					AT2G30490	CYP73A5	Cinnamate-4-hydroxylase [Source:UniProtKB/TrEMBL;Acc:B1GV49]
XLOC_054605	TraesCS3B02G472800	chr3B:721493461-721494894	1.41225	26.2717	4.21744	0.0271	0					0	0	0
XLOC_052379	TraesCS3B02G009600	chr3B:4553316-4554575	1.40815	36.3496	4.69006	0.0196	0					0	0	0
XLOC_053918	TraesCS3B02G327100	chr3B:527727821-527729107	1.4069	33.2379	4.56224	0.0207	0					0	0	0
XLOC_115146	TraesCS6B02G138700	chr6B:135952994-135955081	1.39868	39.6741	4.82605	0.01855	0					AT1G13830	0	Carbohydrate-binding X8 domain superfamily protein [Source:TAIR;Acc:AT1G13830]
XLOC_046232	TraesCS3A02G281500	chr3A:510188082-510189607	1.34377	19.3583	3.8486	0.034	0					AT1G78780	0	pathogenesis-related family protein [Source:TAIR;Acc:AT1G78780]
XLOC_105040	TraesCS5D02G172400	chr5D:269294554-269296188	1.32959	38.3632	4.85067	0.019	0					AT3G07720	0	AT3g07720/F17A17_6 [Source:UniProtKB/TrEMBL;Acc:Q9S7W4]
XLOC_086257	TraesCS5A02G030900	chr5A:28228019-28229612	1.31351	31.1516	4.56781	0.03795	0					0	0	0
XLOC_032344	TraesCS2B02G284700	chr2B:391948314-391949638	1.31201	80.6455	5.94174	0.0324	0					0	0	0
XLOC_083412	TraesCS4D02G121800	chr4D:103251320-103256089	1.30503	11.6005	3.15203	0.04775	0					AT5G01020	PBL8	Probable serine/threonine-protein kinase PBL8 [Source:UniProtKB/Swiss-Prot;Acc:Q8GXZ3]
XLOC_097611	TraesCS5B02G260100	chr5B:442777380-442779366	1.30372	23.7309	4.18605	0.0259	0					AT2G04780	FLA7	Fasciclin-like arabinogalactan protein 7 [Source:UniProtKB/Swiss-Prot;Acc:Q9SJ81]
XLOC_008396	TraesCS1B02G412100	chr1B:638013347-638015996	1.30284	25.5965	4.29621	0.03035	0					AT3G61750	0	Cytochrome b561 and DOMON domain-containing protein At3g61750 [Source:UniProtKB/Swiss-Prot;Acc:Q9M363]
XLOC_016668	TraesCS1D02G167100	chr1D:238317413-238321702	1.30258	8.68849	2.73774	0.0378	0					AT1G07210	0	F10K1.8 protein [Source:UniProtKB/TrEMBL;Acc:Q9LML3]
XLOC_142929	TraesCS7D02G173500	chr7D:125908898-125910332	1.30117	50.2755	5.27197	0.0429	0					0	0	0
XLOC_037682	TraesCS2D02G180500	chr2D:125264784-125267327	1.29767	54.5394	5.3933	0.0371	0					AT1G49420	0	Heavy metal transport/detoxification superfamily protein [Source:UniProtKB/TrEMBL;Acc:F4I1R5]
XLOC_006908	TraesCS1B02G115800	chr1B:136167711-136169611	1.27919	14.2418	3.47683	0.04715	Peroxidase [Source:UniProtKB/TrEMBL;Acc:W5AB29]					AT1G49570	PER10	Peroxidase [Source:UniProtKB/TrEMBL;Acc:A0A178WK78]
XLOC_037340	TraesCS2D02G107300	chr2D:59626915-59628588	1.26828	16.0536	3.66195	0.0387	Peroxidase [Source:UniProtKB/TrEMBL;Acc:A0A1D5UYK9]					0	0	0
XLOC_098448	TraesCS5B02G437100	chr5B:610500013-610503552	1.25959	26.2178	4.37952	0.0413	Glutamate dehydrogenase [Source:UniProtKB/TrEMBL;Acc:A0A341VUZ0]					AT3G03910	GSH3	Glutamate dehydrogenase [Source:UniProtKB/TrEMBL;Acc:A0A178VBI2]
XLOC_057207	TraesCS3B02G399300	chr3B:630400562-630402098	1.21641	13.4062	3.46221	0.0455	0					0	0	0
XLOC_046775	TraesCS3A02G387800	chr3A:636697799-636699323	1.21521	8.28405	2.76913	0.0386	0					AT4G15093	LIGB	Extradiol ring-cleavage dioxygenase [Source:UniProtKB/Swiss-Prot;Acc:Q949R4]
XLOC_042314	TraesCS2D02G523800	chr2D:612455051-612455378	1.21464	247.527	7.67092	0.0014	0					0	0	0
XLOC_070878	TraesCS4A02G045900	chr4A:37804105-37809088	1.21149	21.2971	4.1358	0.0263	Adenylyl-sulfate kinase [Source:UniProtKB/TrEMBL;Acc:A0A1D5XBK0]					AT2G14750	APK1	Adenylyl-sulfate kinase [Source:UniProtKB/TrEMBL;Acc:A0A178VLM3]
XLOC_090015	TraesCS5A02G242300	chr5A:457538211-457540292	1.21011	18.5116	3.93522	0.0409	0					0	0	0
XLOC_081696	TraesCS4D02G134600	chr4D:121432470-121439689	1.18083	24.8154	4.39337	0.02215	0					AT1G07420	SMO2-2	Methylsterol monooxygenase 2-2 [Source:UniProtKB/Swiss-Prot;Acc:Q8VWZ8]
XLOC_116073	TraesCS6B02G331300	chr6B:582391802-582401724	1.17725	269.51	7.83878	0.0137	0					AT1G78060	BXL7	Probable beta-D-xylosidase 7 [Source:UniProtKB/Swiss-Prot;Acc:Q9SGZ5]
XLOC_075609	TraesCS4B02G115600	chr4B:132320205-132321720	1.17688	7.54094	2.67978	0.03915	0					0	0	0
XLOC_039550	TraesCS2D02G549200	chr2D:624661939-624666843	1.17113	30.727	4.71353	0.0275	Polyamine oxidase, Seed germinatio [Source: Projected from Oryza sativa (Os04g0671300)]					AT1G65840	PAO4	Probable polyamine oxidase 4 [Source:UniProtKB/Swiss-Prot;Acc:Q8H191]
XLOC_144119	TraesCS7D02G417400	chr7D:535966810-535968667	1.16797	55.9363	5.5817	0.03235	Peroxidase [Source:UniProtKB/TrEMBL;Acc:A0A341Z2I2]					AT5G19880	PER58	Peroxidase 58 [Source:UniProtKB/Swiss-Prot;Acc:P59120]
XLOC_143886	TraesCS7D02G369700	chr7D:478370056-478371603	1.14604	20.5395	4.16368	0.0213	Peroxidase [Source:UniProtKB/TrEMBL;Acc:A0A1D6SEY5]					0	0	0
XLOC_111436	TraesCS6A02G131900	chr6A:104112856-104114229	1.14397	8.35897	2.86928	0.0369	0					AT2G15440	0	At2g15440 [Source:UniProtKB/TrEMBL;Acc:Q9SJN8]
XLOC_122184	TraesCS6D02G127100	chr6D:90922420-90924937	1.13861	35.759	4.97296	0.0185	Peroxidase [Source:UniProtKB/TrEMBL;Acc:A0A1D6BFK7]					0	0	0
XLOC_033795	TraesCS2B02G592600	chr2B:777520978-777522445	1.13781	9.96204	3.13018	0.0294	0					AT1G47655	DOF1.6	Dof zinc finger protein DOF1.6 [Source:UniProtKB/Swiss-Prot;Acc:Q9SX97]
XLOC_017857	TraesCS1D02G408300	chr1D:470728934-470732089	1.13334	51.0438	5.49308	0.02105	0					0	0	0
XLOC_028933	TraesCS2B02G218600	chr2B:207481869-207483875	1.1276	16.4718	3.86867	0.04105	0					AT2G16120	PLT1	Putative polyol transporter 1 [Source:UniProtKB/Swiss-Prot;Acc:Q9XIH7]
XLOC_062757	TraesCS3D02G360900	chr3D:474450606-474452547	1.10944	16.5769	3.90127	0.03875	0					AT2G39980	0	At2g39980/T28M21.14 [Source:UniProtKB/TrEMBL;Acc:O04201]
XLOC_024121	TraesCS2A02G292400	chr2A:503630724-503632743	1.10831	14.2935	3.68893	0.04595	0					AT3G10560	UNE9	UNE9 [Source:UniProtKB/TrEMBL;Acc:A0A384L3Q8]
XLOC_015586	TraesCS1D02G393600	chr1D:463017111-463019518	1.07735	31.3732	4.86397	0.0184	0					AT3G61750	0	Cytochrome b561 and DOMON domain-containing protein At3g61750 [Source:UniProtKB/Swiss-Prot;Acc:Q9M363]
XLOC_131372	TraesCS7A02G319100	chr7A:459460509-459462059	1.05985	11.0463	3.38164	0.0268	Peroxidase [Source:UniProtKB/TrEMBL;Acc:A0A341XZ11]					AT4G33420	0	Peroxidase superfamily protein [Source:TAIR;Acc:AT4G33420]
XLOC_000699	TraesCS1A02G143900	chr1A:248877652-248881757	1.02094	21.6252	4.40474	0.01885	0					AT5G48880	KAT5	PKT2 [Source:UniProtKB/TrEMBL;Acc:A0A178UEC0]
XLOC_031527	TraesCS2B02G125600	chr2B:93881293-93883141	1.00524	30.9722	4.94536	0.01895	Peroxidase [Source:UniProtKB/TrEMBL;Acc:C6ES53]					0	0	0
XLOC_088529	TraesCS5A02G486800	chr5A:657394481-657396507	0.995517	12.2735	3.62396	0.04855	0					AT2G26480	UGT76D1	UDP-glycosyltransferase 76D1 [Source:UniProtKB/Swiss-Prot;Acc:O48715]
XLOC_008056	TraesCS1B02G346200	chr1B:574462919-574465512	0.994581	79.2265	6.31575	0.0143	0					AT1G13830	0	Carbohydrate-binding X8 domain superfamily protein [Source:TAIR;Acc:AT1G13830]
XLOC_081506	TraesCS4D02G093000	chr4D:68421889-68427970	0.970216	12.3814	3.67373	0.03685	Transmembrane 9 superfamily member [Source:UniProtKB/TrEMBL;Acc:A0A341UQ77]					AT1G10950	TMN1	Transmembrane 9 superfamily member 1 [Source:UniProtKB/Swiss-Prot;Acc:Q940G0]
XLOC_144867	TraesCS7D02G008700	chr7D:4198464-4202181	0.959163	21.5878	4.49229	0.0268	Sucrose:sucrose 1-fructosyltransferase [Source:UniProtKB/TrEMBL;Acc:Q8W430]					AT1G12240	BFRUCT4	Acid beta-fructofuranosidase 4, vacuolar [Source:UniProtKB/Swiss-Prot;Acc:Q39041]
XLOC_068431	TraesCS4A02G041600	chr4A:35174174-35180072	0.951689	7.23793	2.92701	0.0361	At5g42970 [Source:Projected from Arabidopsis thaliana (AT5G42970) UniProtKB/TrEMBL;Acc:Q1H5B6]					AT5G42970	CSN4	At5g42970 [Source:UniProtKB/TrEMBL;Acc:Q1H5B6]
XLOC_110647	TraesCS6A02G389900	chr6A:605102519-605104336	0.940399	56.3811	5.9058	0.03475	0					0	0	0
XLOC_137503	TraesCS7B02G046400	chr7B:45175300-45177003	0.940342	13.729	3.8679	0.0324	0					AT1G07240	UGT71C5	UDP-glycosyltransferase 71C5 [Source:UniProtKB/Swiss-Prot;Acc:Q9FE68]
XLOC_138645	TraesCS7B02G283800	chr7B:517920307-517923307	0.935462	18.8949	4.33618	0.0305	0					0	0	0
XLOC_077170	TraesCS4B02G051200	chr4B:39757035-39762477	0.933035	17.5093	4.23004	0.02	0					AT1G14690	MAP65-7	65-kDa microtubule-associated protein 7 [Source:UniProtKB/Swiss-Prot;Acc:Q8L836]
XLOC_007132	TraesCS1B02G161300	chr1B:278088654-278092842	0.932968	20.1315	4.43148	0.0217	0					AT5G48880	KAT5	PKT2 [Source:UniProtKB/TrEMBL;Acc:A0A178UEC0]
XLOC_054425	TraesCS3B02G433000	chr3B:671996045-671999023	0.926657	19.3211	4.382	0.02145	0					AT1G06020	0	Probable fructokinase-3 [Source:UniProtKB/Swiss-Prot;Acc:Q9LNE4]
XLOC_065636	TraesCS3D02G403800	chr3D:517809084-517812966	0.910796	5.46302	2.5845	0.0402	Stearoyl-[acyl-carrier-protein] 9-desaturase 6, chloroplastic [Source:Projected from Arabidopsis thaliana (AT1G43800) UniProtKB/Swiss-Prot;Acc:Q84VY3]					AT1G43800	S-ACP-DES6	Stearoyl-[acyl-carrier-protein] 9-desaturase 6, chloroplastic [Source:UniProtKB/Swiss-Prot;Acc:Q84VY3]
XLOC_065068	TraesCS3D02G294400	chr3D:405840794-405842727	0.905111	11.7524	3.69871	0.0382	0					0	0	0
XLOC_029444	TraesCS2B02G329100	chr2B:472896889-472900146	0.903552	6.87696	2.92809	0.0361	0					AT1G29150	RPN6	26S proteasome non-ATPase regulatory subunit 11 homolog [Source:UniProtKB/Swiss-Prot;Acc:Q9LP45]
XLOC_042633	TraesCS2D02G589000	chr2D:645827892-645832225	0.89716	6.64275	2.88834	0.03555	3-isopropylmalate dehydrogenase [Source:UniProtKB/TrEMBL;Acc:A0A1D5UHC9]					AT1G31180	ATIMD3	isopropylmalate dehydrogenase 3 [Source:TAIR;Acc:AT1G31180]
XLOC_031982	TraesCS2B02G215100	chr2B:200470578-200473320	0.896526	14.2688	3.99238	0.0225	0					AT3G48720	0	HXXXD-type acyl-transferase family protein [Source:UniProtKB/TrEMBL;Acc:Q9SMM7]
XLOC_014333	TraesCS1D02G142700	chr1D:198085700-198089655	0.882095	9.96789	3.49828	0.04485	0					AT5G48880	KAT5	PKT2 [Source:UniProtKB/TrEMBL;Acc:A0A178UEC0]
XLOC_053936	TraesCS3B02G333600	chr3B:540201068-540207026	0.878517	5.41203	2.62303	0.04275	0					0	0	0
XLOC_009004	TraesCS1B02G049200	chr1B:28764385-28767794	0.845173	31.8622	5.23645	0.02455	PPa4 [Source:Projected from Arabidopsis thaliana (AT3G53620) UniProtKB/TrEMBL;Acc:A0A178VKC0]					AT3G53620	PPA4	PPa4 [Source:UniProtKB/TrEMBL;Acc:A0A178VKC0]
XLOC_138182	TraesCS7B02G186300	chr7B:307362886-307366726	0.836494	9.63706	3.52617	0.04685	Transmembrane 9 superfamily member [Source:UniProtKB/TrEMBL;Acc:A0A341YEK2]					AT2G24170	TMN10	Transmembrane 9 superfamily member 10 [Source:UniProtKB/Swiss-Prot;Acc:Q8RWW1]
XLOC_061802	TraesCS3D02G159100	chr3D:128541066-128550504	0.834653	10.4166	3.64156	0.0409	Reticulon-like protein [Source:UniProtKB/TrEMBL;Acc:A0A1D5WU14]					AT1G64090	RTNLB3	Reticulon-like protein [Source:UniProtKB/TrEMBL;Acc:F4I596]
XLOC_118923	TraesCS6B02G437900	chr6B:704460918-704462825	0.823564	8.99323	3.44889	0.04685	0					AT3G29590	5MAT	Malonyl-CoA:anthocyanidin 5-O-glucoside-6''-O-malonyltransferase [Source:UniProtKB/Swiss-Prot;Acc:Q9LJB4]
XLOC_109588	TraesCS6A02G177900	chr6A:199457897-199459852	0.811098	7.64341	3.23627	0.0293	Glycosyltransferase [Source:UniProtKB/TrEMBL;Acc:W5GEC4]					0	0	0
XLOC_024626	TraesCS2A02G399300	chr2A:652519804-652520170	0.806507	16.6393	4.36677	0.0342	0					0	0	0
XLOC_008667	TraesCS1B02G465000	chr1B:676073959-676075942	0.79583	5.3502	2.74906	0.0376	0					AT2G18190	0	AAA-ATPase At2g18190 [Source:UniProtKB/Swiss-Prot;Acc:F4IQG2]
XLOC_061146	TraesCS3D02G025000	chr3D:8436905-8439801	0.784937	9.86226	3.65127	0.04505	0					AT3G18170	0	Glycosyltransferase family 61 protein [Source:UniProtKB/TrEMBL;Acc:Q9LV23]
XLOC_013954	TraesCS1D02G066100	chr1D:47872955-47879800	0.750729	17.6798	4.55767	0.01275	0					AT1G10390	NUP98A	Nuclear pore complex protein NUP98A [Source:UniProtKB/Swiss-Prot;Acc:Q8RY25]
XLOC_103597	TraesCS5D02G446400	chr5D:496846187-496848364	0.73924	5.99972	3.02078	0.03315	0					0	0	0
XLOC_144873	TraesCS7D02G009400	chr7D:4515236-4518875	0.734198	48.9112	6.05785	0.03915	0					AT1G12240	BFRUCT4	Acid beta-fructofuranosidase 4, vacuolar [Source:UniProtKB/Swiss-Prot;Acc:Q39041]
XLOC_031216	TraesCS2B02G057100	chr2B:27735580-27737791	0.72982	19.4761	4.73802	0.0178	Flavone synthase II (FNSII), Biosynthesis of tricin O-linked conjugate [Source: Projected from Oryza sativa (Os04g0101400)]					0	0	0
XLOC_075310	TraesCS4B02G050400	chr4B:39014115-39016599	0.717494	34.4533	5.58553	0.0377	UDP-glucose 6-dehydrogenase [Source:UniProtKB/TrEMBL;Acc:A0A341U7Z6]					0	0	0
XLOC_087046	TraesCS5A02G192300	chr5A:395909731-395919630	0.71453	11.7844	4.04374	0.03275	0					AT1G72970	HTH	HTH [Source:UniProtKB/TrEMBL;Acc:A0A178WG21]
XLOC_087249	TraesCS5A02G231600	chr5A:447309435-447309828	0.647087	17.8602	4.78665	0.0271	0					AT2G31940	0	Oxidoreductase/transition metal ion-binding protein [Source:UniProtKB/TrEMBL;Acc:Q9SKA6]
XLOC_132100	TraesCS7A02G474000	chr7A:669551755-669554487	0.621236	5.59843	3.17181	0.0367	0					AT2G03930	0	Protein of Unknown Function (DUF239) [Source:TAIR;Acc:AT2G03930]
XLOC_142275	TraesCS7D02G036600	chr7D:18678819-18684208	0.594357	11.9972	4.33523	0.01965	Sucrose synthase [Source:UniProtKB/TrEMBL;Acc:A0A1D6D1F6]					AT3G43190	SUS4	Sucrose synthase 4 [Source:UniProtKB/Swiss-Prot;Acc:Q9LXL5]
XLOC_076634	TraesCS4B02G336100	chr4B:627938880-627944104	0.591127	26.3445	5.47789	0.0364	Mitochondrial outer membrane protein porin 4 [Source:Projected from Arabidopsis thaliana (AT5G57490) UniProtKB/Swiss-Prot;Acc:Q9FKM2]					AT5G57490	VDAC4	Mitochondrial outer membrane protein porin 4 [Source:UniProtKB/Swiss-Prot;Acc:Q9FKM2]
XLOC_029174	TraesCS2B02G273300	chr2B:374677568-374682900	0.58672	3.95726	2.75376	0.03745	0					AT3G22310	RH9	DEAD-box ATP-dependent RNA helicase 9, mitochondrial [Source:UniProtKB/Swiss-Prot;Acc:Q9LUW6]
XLOC_106275	TraesCS5D02G435900	chr5D:490757336-490766902	0.584614	7.99842	3.77416	0.04065	0					AT1G04580	AAO4	Benzaldehyde dehydrogenase (NAD(+)) [Source:UniProtKB/Swiss-Prot;Acc:Q7G191]
XLOC_078148	TraesCS4B02G247500	chr4B:512334815-512335226	0.570554	92.035	7.33368	0.00145	Histone H3 [Source:UniProtKB/TrEMBL;Acc:A0A341UFY8]					0	0	0
XLOC_061634	TraesCS3D02G124400	chr3D:82092130-82103031	0.563807	7.5439	3.74204	0.03025	0					AT2G26910	ABCG32	PEC1 [Source:UniProtKB/TrEMBL;Acc:A0A178VNA5]
XLOC_089009	TraesCS5A02G026300	chr5A:21430448-21434626	0.561772	6.9557	3.63014	0.02595	0					AT2G26730	0	Probable inactive receptor kinase At2g26730 [Source:UniProtKB/Swiss-Prot;Acc:O48788]
XLOC_144289	TraesCS7D02G451800	chr7D:571704227-571711213	0.55837	71.8669	7.00796	0.01685	0					AT5G11720	0	AT5g11720/T22P22_110 [Source:UniProtKB/TrEMBL;Acc:Q9LYF8]
XLOC_010201	TraesCS1B02G301600	chr1B:522055415-522061604	0.550793	3.67871	2.73962	0.03935	0					AT3G51850	CPK13	CPK13 [Source:UniProtKB/TrEMBL;Acc:A0A178VEY4]
XLOC_094805	TraesCS5B02G265100	chr5B:449128689-449132674	0.544826	8.15489	3.9038	0.0366	0					AT1G51570	0	Calcium-dependent lipid-binding (CaLB domain) plant phosphoribosyltransferase family protein [Source:UniProtKB/TrEMBL;Acc:Q9C8H3]
XLOC_106169	TraesCS5D02G413500	chr5D:476460372-476464433	0.540981	7.12951	3.72015	0.03475	Pentatricopeptide repeat-containing protein DWY1, chloroplastic [Source:Projected from Arabidopsis thaliana (AT1G47580) UniProtKB/Swiss-Prot;Acc:P0C7R1]					AT1G47580	DYW1	Pentatricopeptide repeat-containing protein DWY1, chloroplastic [Source:UniProtKB/Swiss-Prot;Acc:P0C7R1]
XLOC_041403	TraesCS2D02G326900	chr2D:420174304-420180243	0.534769	15.3323	4.84152	0.01955	0					AT1G74920	ALDH10A8	ALDH10A8 [Source:UniProtKB/TrEMBL;Acc:A0A178W4Y2]
XLOC_007879	TraesCS1B02G309300	chr1B:532164948-532170799	0.519594	6.85257	3.72119	0.03665	DNA helicase [Source:UniProtKB/TrEMBL;Acc:A0A1D5SFJ2]					AT5G46280	MCM3	DNA replication licensing factor MCM3 [Source:UniProtKB/Swiss-Prot;Acc:Q9FL33]
XLOC_056896	TraesCS3B02G337100	chr3B:543466728-543471191	0.474366	3.86592	3.02674	0.03315	0					AT4G07960	CSLC12	CSLC12 [Source:UniProtKB/TrEMBL;Acc:A0A384KRZ4]
XLOC_062166	TraesCS3D02G231700	chr3D:317550901-317558891	0.458773	5.26424	3.52037	0.03745	0					AT3G62160	0	At3g62160 [Source:UniProtKB/TrEMBL;Acc:Q9M1Q8]
XLOC_000726	TraesCS1A02G149300	chr1A:256823680-256827995	0.414519	5.77339	3.79991	0.0352	Cellulose synthase [Source:UniProtKB/TrEMBL;Acc:W4ZU60]					0	0	0
XLOC_040322	TraesCS2D02G101500	chr2D:54670943-54677910	0.401863	5.09524	3.66438	0.04495	0					AT3G04080	APY1	Apyrase 1 [Source:UniProtKB/Swiss-Prot;Acc:Q9SQG2]
XLOC_104501	TraesCS5D02G063200	chr5D:58685750-58686230	0.390826	102.221	8.03094	0.0014	Histone H2B [Source:UniProtKB/TrEMBL;Acc:W5G400]					AT1G07790	HTB1	Histone H2B.1 [Source:UniProtKB/Swiss-Prot;Acc:Q9LQQ4]
XLOC_104294	TraesCS5D02G016800	chr5D:9526297-9526780	0.385516	7.44949	4.27228	0.03145	0					0	0	0
XLOC_022297	TraesCS2A02G521400	chr2A:744325751-744332292	0.340877	5.52677	4.01911	0.0248	0					AT3G28860	ABCB19	ABC transporter B family member 19 [Source:UniProtKB/Swiss-Prot;Acc:Q9LJX0]
XLOC_037936	TraesCS2D02G233800	chr2D:209506679-209512079	0.303805	7.82156	4.68624	0.01545	0					AT4G20140	GSO1	LRR receptor-like serine/threonine-protein kinase GSO1 [Source:UniProtKB/Swiss-Prot;Acc:C0LGQ5]
XLOC_152323	TraesCSU02G270700	chrUn:454676618-454677179	0.284715	5.33789	4.22868	0.03105	0					0	0	0
XLOC_090549	TraesCS5A02G353600	chr5A:556533815-556534377	0.283762	1243.46	12.0974	0.00205	Histone H4 variant TH011 [Source:UniProtKB/Swiss-Prot;Acc:P62785]					AT1G07820	0	Histone H4 [Source:UniProtKB/TrEMBL;Acc:Q6NR90]
XLOC_078752	TraesCS4B02G367600	chr4B:654465902-654466496	0.25631	12.7235	5.63346	0.0251	0					AT2G45180	0	At2g45180/T14P1.1 [Source:UniProtKB/TrEMBL;Acc:Q42044]
XLOC_116184	TraesCS6B02G353500	chr6B:619404618-619405226	0.245898	13.7024	5.80023	0.0229	0					0	0	0
XLOC_068516	TraesCS4A02G057500	chr4A:48275372-48276006	0.228642	213.533	9.86715	0.00175	Histone H3.2 [Source:UniProtKB/Swiss-Prot;Acc:P68428]					0	0	0
XLOC_027964	TraesCS2B02G017800	chr2B:8271344-8278651	0.228112	5.51248	4.59489	0.0318	0					0	0	0
XLOC_015522	TraesCS1D02G381100	chr1D:456199599-456200246	0.220889	296.818	10.392	0.00205	0					0	0	0
XLOC_136613	TraesCS7B02G366600	chr7B:630309717-630311495	0.212571	11.0802	5.7039	0.026	0					0	0	0
XLOC_007802	TraesCS1B02G293400	chr1B:511190530-511191199	0.208899	5.65842	4.75952	0.02795	0					AT3G55420	0	Uncharacterized protein At3g55420 [Source:UniProtKB/TrEMBL;Acc:Q9M2T7]
XLOC_109998	TraesCS6A02G264000	chr6A:486976399-486977107	0.190556	12.477	6.03291	0.0229	0					0	0	0
XLOC_114865	TraesCS6B02G082300	chr6B:59100485-59101310	0.18595	4.68768	4.65589	0.0276	Histone H2A [Source:UniProtKB/TrEMBL;Acc:A0A1D6AXK2]					0	0	0
XLOC_118002	TraesCS6B02G249300	chr6B:447115179-447119138	0.183133	5.35872	4.87093	0.0287	Enhancer of rudimentary homolog [Source:UniProtKB/TrEMBL;Acc:W5GVP9]					AT5G10810	ATER	Enhancer of rudimentary homolog [Source:UniProtKB/Swiss-Prot;Acc:Q96319]
XLOC_017655	TraesCS1D02G364400	chr1D:445366147-445366879	0.180785	493.143	11.4135	0.00195	Histone H4 variant TH011 [Source:UniProtKB/Swiss-Prot;Acc:P62785]					AT5G59970	0	Histone H4 [Source:UniProtKB/TrEMBL;Acc:Q6NR90]
XLOC_094562	TraesCS5B02G218500	chr5B:392107270-392108120	0.173374	8.06481	5.53968	0.0254	0					AT3G22840	ELIP1	ELIP1 [Source:UniProtKB/TrEMBL;Acc:A0A178VCA8]
XLOC_114863	TraesCS6B02G082100	chr6B:58812297-58813153	0.171615	12.3265	6.16644	0.02125	Histone H2A [Source:UniProtKB/TrEMBL;Acc:A0A1D6AV43]					0	0	0
XLOC_135304	TraesCS7B02G105000	chr7B:121115519-121116985	0.169551	2.74567	4.01737	0.02955	0					0	0	0
XLOC_023767	TraesCS2A02G218800	chr2A:205914190-205916046	0.169212	2.91166	4.10494	0.029	0					0	0	0
XLOC_118277	TraesCS6B02G304700	chr6B:545278567-545279354	0.161767	29.3587	7.50373	0.0014	0					0	0	0
XLOC_087927	TraesCS5A02G369200	chr5A:569463646-569464502	0.142902	9.1673	6.0034	0.0192	0					0	0	0
XLOC_096879	TraesCS5B02G108600	chr5B:147468501-147471618	0.138004	4.92389	5.15702	0.02595	Eukaryotic translation initiation factor 5A [Source:UniProtKB/TrEMBL;Acc:A0A1D5ZHG4]					AT1G13950	ELF5A-1	Eukaryotic translation initiation factor 5A [Source:UniProtKB/TrEMBL;Acc:A0A178WBN7]
XLOC_124501	TraesCS6D02G193100	chr6D:267236633-267237837	0.131973	13.6067	6.68794	0.00145	Nitrate assimilation related protein [Source:UniProtKB/TrEMBL;Acc:A0A286T4J2]					0	0	0
XLOC_039061	TraesCS2D02G455000	chr2D:563142796-563143806	0.130951	12.836	6.61502	0.0015	0					0	0	0
XLOC_095724	TraesCS5B02G443400	chr5B:616265359-616266511	0.129945	1.85796	3.83775	0.02945	Pathogenesis-related protein 1-7 [Source:UniProtKB/TrEMBL;Acc:F8S6T7]					0	0	0
XLOC_117950	TraesCS6B02G238700	chr6B:415788847-415790024	0.129151	17.1502	7.05302	0.0014	0					0	0	0
XLOC_146927	TraesCS7D02G428900	chr7D:548915190-548916210	0.127399	7.42071	5.86413	0.0173	0					0	0	0
XLOC_017067	TraesCS1D02G248200	chr1D:341175727-341176889	0.127399	7.03015	5.78612	0.02155	CASP-like protein [Source:UniProtKB/TrEMBL;Acc:A0A1D5SU15]					0	0	0
XLOC_076709	TraesCS4B02G349400	chr4B:642544028-642544959	0.126826	4.01819	4.98562	0.0239	0					AT5G13090	0	Uncharacterized protein At5g13090 [Source:UniProtKB/TrEMBL;Acc:Q8H0Z9]
XLOC_145493	TraesCS7D02G131600	chr7D:83455282-83456324	0.126447	8.7885	6.11901	0.0219	0					0	0	0
XLOC_015235	TraesCS1D02G325100	chr1D:417572721-417573771	0.125137	2.68679	4.4243	0.02635	0					0	0	0
XLOC_110902	TraesCS6A02G022500	chr6A:11249999-11252434	0.122775	2.13512	4.12023	0.02895	0					0	0	0
XLOC_087663	TraesCS5A02G314600	chr5A:525025720-525026755	0.122597	4.26422	5.12029	0.0279	0					0	0	0
XLOC_102433	TraesCS5D02G222000	chr5D:329509511-329510480	0.119987	4.91288	5.35562	0.02465	0					0	0	0
XLOC_109916	TraesCS6A02G248100	chr6A:460631250-460632223	0.11931	2.07651	4.12138	0.02895	0					AT1G62520	0	Sulfated surface-like glycoprotein [Source:UniProtKB/TrEMBL;Acc:Q9SXE5]
XLOC_052887	TraesCS3B02G108800	chr3B:74817162-74818271	0.114931	8.83376	6.26418	0.02025	Xyloglucan endotransglucosylase/hydrolase [Source:UniProtKB/TrEMBL;Acc:W5CS03]					0	0	0
XLOC_000617	TraesCS1A02G126000	chr1A:150890797-150895231	0.114931	3.06237	4.73581	0.02835	N-alpha-acetyltransferase MAK3 [Source:Projected from Arabidopsis thaliana (AT2G38130) UniProtKB/Swiss-Prot;Acc:O80438]					AT2G38130	MAK3	N-alpha-acetyltransferase MAK3 [Source:UniProtKB/Swiss-Prot;Acc:O80438]
XLOC_106617	TraesCS5D02G506100	chr5D:531971002-531972109	0.114001	7.71247	6.08007	0.02365	NAR2.2 [Source:UniProtKB/TrEMBL;Acc:Q5UBW8]					0	0	0
XLOC_007552	TraesCS1B02G243400	chr1B:432376509-432377516	0.113848	15.8715	7.12319	0.0014	0					AT1G02816	0	F22D16.19 protein [Source:UniProtKB/TrEMBL;Acc:Q9SRX5]
XLOC_041590	TraesCS2D02G362600	chr2D:468765973-468773103	0.111742	3.89636	5.12389	0.0279	0					AT1G20770	0	At1g20770 [Source:UniProtKB/TrEMBL;Acc:Q9LM77]
XLOC_077231	TraesCS4B02G063600	chr4B:55726239-55727285	0.108168	13.545	6.96835	0.00145	0					AT5G66590	0	CAP (Cysteine-rich secretory proteins, Antigen 5, and Pathogenesis-related 1 protein) superfamily protein [Source:UniProtKB/TrEMBL;Acc:Q9FJY1]
XLOC_039450	TraesCS2D02G531000	chr2D:617081011-617089572	0.103659	5.75142	5.794	0.02155	0					AT1G62610	0	NAD(P)-binding Rossmann-fold superfamily protein [Source:UniProtKB/TrEMBL;Acc:F4HYU6]
XLOC_052751	TraesCS3B02G080500	chr3B:50932083-50933456	0.102652	1.47697	3.8468	0.02945	0					AT3G45577	0	tRNA-intron endonuclease [Source:UniProtKB/TrEMBL;Acc:Q2V3Q6]
XLOC_095747	TraesCS5B02G448400	chr5B:620669348-620670561	0.102033	22.3386	7.77436	0.0014	0					0	0	0
XLOC_062408	TraesCS3D02G284200	chr3D:393524474-393526973	0.1001	6.48494	6.01757	0.0191	MADS-box transcription factor TaAGL14 [Source:UniProtKB/TrEMBL;Acc:Q1G165]					0	0	0
XLOC_077291	TraesCS4B02G075200	chr4B:71244990-71247199	0.0996286	4.81569	5.59504	0.02605	0					0	0	0
XLOC_095376	TraesCS5B02G379400	chr5B:557528892-557533446	0.0982395	2.93089	4.89889	0.02865	Vacuolar protein sorting-associated protein 2 homolog 2 [Source:Projected from Arabidopsis thaliana (AT5G44560) UniProtKB/Swiss-Prot;Acc:Q0WTY4]					AT5G44560	VPS2.2	Vacuolar protein sorting-associated protein 2 homolog 2 [Source:UniProtKB/Swiss-Prot;Acc:Q0WTY4]
XLOC_143067	TraesCS7D02G207500	chr7D:164868841-164870080	0.0961177	1.87969	4.28955	0.0296	0					0	0	0
XLOC_104837	TraesCS5D02G131900	chr5D:209497825-209501416	0.093981	1.83881	4.29026	0.0296	0					AT1G72030	0	Acyl-CoA N-acyltransferases (NAT) superfamily protein [Source:UniProtKB/TrEMBL;Acc:Q9C7G6]
XLOC_041347	TraesCS2D02G312900	chr2D:402550993-402552177	0.0919372	9.94555	6.75726	0.0014	0					0	0	0
XLOC_093807	TraesCS5B02G058800	chr5B:64418743-64420036	0.0907531	13.8417	7.25286	0.0014	Auxin-responsive protein [Source:UniProtKB/TrEMBL;Acc:A0A341V9T8]					AT1G04240	SHY2	AUX/IAA transcriptional regulator family protein [Source:TAIR;Acc:AT1G04240]
XLOC_132052	TraesCS7A02G464800	chr7A:661277483-661281454	0.0899805	8.25435	6.5194	0.0016	0					AT1G56010	NAC021	NAC domain-containing protein 21/22 [Source:UniProtKB/Swiss-Prot;Acc:Q84TE6]
XLOC_018086	TraesCS1D02G454500	chr1D:495124504-495127774	0.0857813	3.09761	5.17435	0.0256	0					0	0	0
XLOC_131559	TraesCS7A02G355900	chr7A:521463640-521464896	0.0852623	8.62188	6.65995	0.00155	0					0	0	0
XLOC_081226	TraesCS4D02G036100	chr4D:16146440-16147710	0.0840754	3.12399	5.21556	0.026	ELO domain-containing protein [Source:UniProtKB/TrEMBL;Acc:I3NM07]					AT3G06460	0	F24P17.4 protein [Source:UniProtKB/TrEMBL;Acc:Q9SQU9]
XLOC_046517	TraesCS3A02G336800	chr3A:583747946-583749328	0.0837423	2.76609	5.04575	0.02935	0					AT2G27080	NHL13	NDR1/HIN1-like protein 13 [Source:UniProtKB/Swiss-Prot;Acc:Q9ZVD2]
XLOC_076255	TraesCS4B02G253900	chr4B:519403755-519405220	0.0831657	10.8179	7.02322	0.0014	0					0	0	0
XLOC_081281	TraesCS4D02G046500	chr4D:22017423-22019645	0.0831657	6.78268	6.34972	0.01965	0					0	0	0
XLOC_022019	TraesCS2A02G465800	chr2A:710457024-710458629	0.0822756	5.18227	5.97698	0.02185	0					0	0	0
XLOC_115803	TraesCS6B02G277200	chr6B:501519831-501523124	0.0819566	4.06234	5.63131	0.0242	0					AT4G16510	0	YbaK/aminoacyl-tRNA synthetase-associated domain-containing protein [Source:UniProtKB/TrEMBL;Acc:Q940I4]
XLOC_045761	TraesCS3A02G181400	chr3A:209602409-209603753	0.078313	8.49848	6.76181	0.0014	0					0	0	0
XLOC_103689	TraesCS5D02G465900	chr5D:508528880-508530234	0.0775943	2.16563	4.80269	0.0279	0					0	0	0
XLOC_032373	TraesCS2B02G290300	chr2B:402679392-402699674	0.0770991	2.23176	4.85532	0.02865	0					AT2G26970	0	Oligoribonuclease [Source:UniProtKB/Swiss-Prot;Acc:Q9ZVE0]
XLOC_082690	TraesCS4D02G342700	chr4D:498956915-498961418	0.0749796	1.3184	4.13614	0.02865	0					AT2G02370	0	At2g02370/T16F16.16 [Source:UniProtKB/TrEMBL;Acc:Q9ZVQ5]
XLOC_000393	TraesCS1A02G078200	chr1A:61008915-61010405	0.0748469	8.67079	6.85608	0.0014	Peroxidase [Source:UniProtKB/TrEMBL;Acc:W4ZYX3]					0	0	0
XLOC_127163	TraesCS7A02G024800	chr7A:9751972-9753961	0.0740602	1.14927	3.95588	0.0299	WAT1-related protein [Source:UniProtKB/TrEMBL;Acc:W5HD93]					AT1G01070	0	WAT1-related protein [Source:UniProtKB/TrEMBL;Acc:A0A178WFU3]
XLOC_105697	TraesCS5D02G310600	chr5D:407106218-407108790	0.0728478	2.18617	4.90737	0.02815	0					0	0	0
XLOC_072192	TraesCS4A02G319100	chr4A:608043458-608044983	0.0727851	6.55295	6.49236	0.01615	Gibberellin 20 oxidase 1-A [Source:UniProtKB/Swiss-Prot;Acc:O04707]					AT1G60980	GA20OX4	Gibberellin 20 oxidase 4 [Source:UniProtKB/Swiss-Prot;Acc:Q9C955]
XLOC_109792	TraesCS6A02G220800	chr6A:410574185-410579010	0.0719184	4.31748	5.90768	0.0223	Similar to 61 kDa protein homolog [Source: Projected from Oryza sativa (Os02g0633400)]					AT2G24490	RPA2A	RPA32A [Source:UniProtKB/TrEMBL;Acc:A0A178VTA7]
XLOC_017220	TraesCS1D02G278200	chr1D:375645731-375647289	0.0715533	6.81422	6.57339	0.0015	0					0	0	0
XLOC_037891	TraesCS2D02G224300	chr2D:192148403-192150693	0.0714324	10.2783	7.16881	0.00145	Xyloglucan endotransglucosylase/hydrolase [Source:UniProtKB/TrEMBL;Acc:A0A1D5UVA9]					AT1G11545	XTH8	Xyloglucan endotransglucosylase/hydrolase [Source:UniProtKB/TrEMBL;Acc:A0A178W0W2]
XLOC_009011	TraesCS1B02G051100	chr1B:30879166-30883218	0.0714324	1.62678	4.5093	0.02845	Nuclear pore complex protein NUP43 [Source:Projected from Arabidopsis thaliana (AT4G30840) UniProtKB/Swiss-Prot;Acc:Q24JJ9]					AT4G30840	NUP43	Nuclear pore complex protein NUP43 [Source:UniProtKB/Swiss-Prot;Acc:Q24JJ9]
XLOC_045099	TraesCS3A02G048400	chr3A:25896098-25897547	0.0713721	14.1117	7.62732	0.0014	0					0	0	0
XLOC_000216	TraesCS1A02G043100	chr1A:23856567-23858030	0.0705385	4.6742	6.05017	0.0237	0					AT3G55560	AHL15	AT-hook motif nuclear-localized protein [Source:UniProtKB/TrEMBL;Acc:A0A178VH84]
XLOC_008098	TraesCS1B02G354900	chr1B:584603645-584605208	0.0695521	10.2282	7.20024	0.0014	Peroxidase [Source:UniProtKB/TrEMBL;Acc:A0A341P6B8]					0	0	0
XLOC_015061	TraesCS1D02G288000	chr1D:386430311-386434440	0.0686486	3.91099	5.83216	0.02325	GPN-loop GTPase 3 [Source:UniProtKB/TrEMBL;Acc:W5DQN8]					AT4G12790	0	AT4G12790 protein [Source:UniProtKB/TrEMBL;Acc:Q8W4C1]
XLOC_002673	TraesCS1A02G104300	chr1A:100099706-100104633	0.068371	2.62056	5.26035	0.02685	Peroxidase [Source:UniProtKB/TrEMBL;Acc:A0A1D5S2V4]					AT5G19880	PER58	Peroxidase 58 [Source:UniProtKB/Swiss-Prot;Acc:P59120]
XLOC_122621	TraesCS6D02G213400	chr6D:303441092-303443431	0.0674978	6.08439	6.49413	0.01615	0					0	0	0
XLOC_045795	TraesCS3A02G189200	chr3A:231669383-231671185	0.0658165	2.59237	5.29968	0.02875	0					AT1G55530	0	At1g55530/T5A14_7 [Source:UniProtKB/TrEMBL;Acc:Q9ZVU8]
XLOC_015321	TraesCS1D02G342200	chr1D:431955238-431958794	0.0647579	3.35697	5.69596	0.0245	0					AT2G25830	0	Probable transcriptional regulatory protein At2g25830 [Source:UniProtKB/Swiss-Prot;Acc:O82314]
XLOC_046065	TraesCS3A02G244700	chr3A:457890562-457892369	0.0647084	3.15318	5.60671	0.02605	0					AT1G34040	TAR3	Tryptophan aminotransferase-related protein 3 [Source:UniProtKB/Swiss-Prot;Acc:Q9FE98]
XLOC_021181	TraesCS2A02G305900	chr2A:526097835-526100325	0.063781	2.31496	5.18172	0.0256	0					0	0	0
XLOC_125065	TraesCS6D02G305400	chr6D:414255644-414258021	0.0632561	7.21659	6.83397	0.0014	0					AT1G05010	ACO4	1-aminocyclopropane-1-carboxylate oxidase 4 [Source:UniProtKB/Swiss-Prot;Acc:Q06588]
XLOC_124235	TraesCS6D02G136100	chr6D:104298918-104300763	0.0620947	1.86813	4.91098	0.02815	0					0	0	0
XLOC_065624	TraesCS3D02G401400	chr3D:515965562-515968953	0.0619582	1.92836	4.95994	0.025	0					AT1G44090	GA20OX5	Gibberellin 20 oxidase 5 [Source:UniProtKB/Swiss-Prot;Acc:Q4PT02]
XLOC_137841	TraesCS7B02G114300	chr7B:132168397-132171701	0.061687	1.08802	4.1406	0.02865	Transcription factor PERIANTHIA [Source:Projected from Arabidopsis thaliana (AT1G68640) UniProtKB/Swiss-Prot;Acc:Q9SX27]					AT1G68640	PAN	Transcription factor PERIANTHIA [Source:UniProtKB/Swiss-Prot;Acc:Q9SX27]
XLOC_105038	TraesCS5D02G172100	chr5D:268936343-268939375	0.0614628	4.46404	6.18249	0.0203	0					AT4G12730	FLA2	Fasciclin-like arabinogalactan protein 2 [Source:UniProtKB/Swiss-Prot;Acc:Q9SU13]
XLOC_061758	TraesCS3D02G150000	chr3D:114677567-114681611	0.0613736	6.81385	6.79471	0.00145	0					AT1G53650	CID8	Polyadenylate-binding protein-interacting protein 8 [Source:UniProtKB/Swiss-Prot;Acc:Q9C8M0]
XLOC_049433	TraesCS3A02G406200	chr3A:650429118-650433106	0.0612846	1.2718	4.3752	0.02995	0					AT1G44090	GA20OX5	Gibberellin 20 oxidase 5 [Source:UniProtKB/Swiss-Prot;Acc:Q4PT02]
XLOC_030586	TraesCS2B02G555100	chr2B:749985679-749987431	0.0601939	1.93669	5.00783	0.0234	0					AT3G29590	5MAT	Malonyl-CoA:anthocyanidin 5-O-glucoside-6''-O-malonyltransferase [Source:UniProtKB/Swiss-Prot;Acc:Q9LJB4]
XLOC_086810	TraesCS5A02G141000	chr5A:313298502-313302625	0.0592242	1.10666	4.22389	0.02765	0					AT2G32760	0	At2g32760/F24L7.10 [Source:UniProtKB/TrEMBL;Acc:Q8S9J3]
XLOC_002336	TraesCS1A02G035200	chr1A:18460512-18462491	0.0591413	1.35072	4.51342	0.02845	0					AT1G07640	OBP2	Dof-type zinc finger DNA-binding family protein [Source:UniProtKB/TrEMBL;Acc:Q2V4Q1]
XLOC_027932	TraesCS2B02G010400	chr2B:5677310-5682095	0.0587305	1.40245	4.57769	0.0305	0					AT5G16880	TOL1	TOM1-like protein 1 [Source:UniProtKB/Swiss-Prot;Acc:Q9LFL3]
XLOC_073085	TraesCS4A02G498400	chr4A:743919789-743924068	0.0581649	1.02674	4.14178	0.02865	0					AT2G47790	GTS1	WD repeat-containing protein GTS1 [Source:UniProtKB/Swiss-Prot;Acc:Q944S2]
XLOC_048919	TraesCS3A02G294300	chr3A:527936885-527941206	0.0580053	15.3595	8.04873	0.0014	0					AT1G29980	0	Uncharacterized protein T1P2.9 [Source:UniProtKB/TrEMBL;Acc:Q9C8S1]
XLOC_081495	TraesCS4D02G090400	chr4D:65531282-65539548	0.0573366	1.36961	4.57816	0.0305	0					AT1G47570	0	At1g47570 [Source:UniProtKB/TrEMBL;Acc:Q6NL06]
XLOC_087217	TraesCS5A02G224300	chr5A:439569137-439573883	0.0572978	3.5705	5.9615	0.02355	0					AT1G15970	0	At1g15970 [Source:UniProtKB/TrEMBL;Acc:Q9S9N7]
XLOC_038730	TraesCS2D02G396000	chr2D:507049352-507051099	0.0570273	5.39002	6.5625	0.0015	0					AT2G45470	FLA8	Fasciclin-like arabinogalactan protein 8 [Source:UniProtKB/Swiss-Prot;Acc:O22126]
XLOC_083810	TraesCS4D02G199200	chr4D:346131638-346133716	0.0559333	1.2203	4.44739	0.0261	DNA topoisomerase 6 subunit A [Source:UniProtKB/TrEMBL;Acc:W5EK18]					AT5G02820	TOP6A	DNA topoisomerase 6 subunit A [Source:UniProtKB/TrEMBL;Acc:A0A178UQD3]
XLOC_076185	TraesCS4B02G237500	chr4B:495147982-495149797	0.0545265	6.68667	6.93819	0.00145	0					0	0	0
XLOC_017382	TraesCS1D02G307200	chr1D:403706776-403708739	0.0543164	2.6532	5.6102	0.026	0					AT1G22220	0	AUF2 [Source:UniProtKB/TrEMBL;Acc:A0A178W7K5]
XLOC_116154	TraesCS6B02G347900	chr6B:612847862-612849777	0.0540042	1.57166	4.86307	0.02835	Glycosyltransferase [Source:UniProtKB/TrEMBL;Acc:A0A1D6ARW2]					AT1G22340	UGT85A7	UDP-glycosyltransferase 85A7 [Source:UniProtKB/Swiss-Prot;Acc:Q9LME8]
XLOC_040481	TraesCS2D02G133900	chr2D:78764127-78767414	0.0538665	0.89583	4.05576	0.0293	30S ribosomal protein S9, mitochondrial [Source:Projected from Arabidopsis thaliana (AT3G49080) UniProtKB/Swiss-Prot;Acc:Q8L6Z4]					AT3G49080	RPS9M	30S ribosomal protein S9, mitochondrial [Source:UniProtKB/Swiss-Prot;Acc:Q8L6Z4]
XLOC_112038	TraesCS6A02G255500	chr6A:473574177-473576966	0.0529888	4.79269	6.499	0.01615	0					0	0	0
XLOC_150660	TraesCSU02G194500	chrUn:291825414-291827299	0.0521715	5.96739	6.83769	0.0014	0					AT2G22900	GT7	Putative glycosyltransferase 7 [Source:UniProtKB/Swiss-Prot;Acc:O81007]
XLOC_077071	TraesCS4B02G031700	chr4B:23661584-23664615	0.0521393	1.24697	4.57991	0.0305	0					AT5G15050	GLCAT14B	Beta-glucuronosyltransferase GlcAT14B [Source:UniProtKB/Swiss-Prot;Acc:Q9LFQ0]
XLOC_094585	TraesCS5B02G223100	chr5B:397949658-397954665	0.0515355	3.32293	6.01074	0.0213	0					AT1G15970	0	At1g15970 [Source:UniProtKB/TrEMBL;Acc:Q9S9N7]
XLOC_057133	TraesCS3B02G385000	chr3B:605021192-605027347	0.050309	1.20371	4.58052	0.0305	Coatomer subunit delta [Source:UniProtKB/TrEMBL;Acc:A0A1D5VZF8]					AT5G05010	0	Coatomer subunit delta [Source:UniProtKB/TrEMBL;Acc:B9DGK9]
XLOC_151590	TraesCSU02G115900	chrUn:100209022-100211013	0.0489687	2.29305	5.54927	0.02625	0					0	0	0
XLOC_144646	TraesCS7D02G524900	chr7D:620924574-620928297	0.0474837	4.30029	6.50086	0.01615	0					AT5G13700	PAO1	Polyamine oxidase 1 [Source:UniProtKB/Swiss-Prot;Acc:Q9FNA2]
XLOC_025063	TraesCS2A02G499700	chr2A:729174776-729177143	0.0473508	1.33088	4.81285	0.0275	0					AT1G30090	0	F-box/kelch-repeat protein At1g30090 [Source:UniProtKB/Swiss-Prot;Acc:Q9C6Z0]
XLOC_031743	TraesCS2B02G165500	chr2B:137620510-137622729	0.0452718	1.41451	4.96555	0.025	0					0	0	0
XLOC_139235	TraesCS7B02G410200	chr7B:679490302-679492450	0.0448873	2.10394	5.55064	0.02625	0					0	0	0
XLOC_057203	TraesCS3B02G398400	chr3B:629192975-629195271	0.0416175	1.69188	5.34529	0.03125	0					AT2G38070	0	Protein of unknown function (DUF740) [Source:TAIR;Acc:AT2G38070]
XLOC_046589	TraesCS3A02G351300	chr3A:599860800-599867349	0.0402696	4.19898	6.7042	0.0014	0					AT3G51850	CPK13	CPK13 [Source:UniProtKB/TrEMBL;Acc:A0A178VEY4]
XLOC_128205	TraesCS7A02G245400	chr7A:223522174-223524637	0.040174	2.51346	5.96727	0.02355	0					0	0	0
XLOC_081670	TraesCS4D02G128900	chr4D:113234903-113237565	0.0394615	1.44042	5.1899	0.02555	0					AT3G05220	HIPP34	Heavy metal-associated isoprenylated plant protein 34 [Source:UniProtKB/Swiss-Prot;Acc:Q0WV37]
XLOC_142490	TraesCS7D02G084100	chr7D:51428364-51433202	0.0376013	2.86394	6.25107	0.0218	Probable sulfate transporter 3.4 [Source:Projected from Arabidopsis thaliana (AT3G15990) UniProtKB/Swiss-Prot;Acc:Q9LW86]					AT3G15990	SULTR3;4	Probable sulfate transporter 3.4 [Source:UniProtKB/Swiss-Prot;Acc:Q9LW86]
XLOC_144153	TraesCS7D02G425100	chr7D:545612899-545617565	0.0354421	1.22093	5.10637	0.02745	0					0	0	0
XLOC_105265	TraesCS5D02G217700	chr5D:326733540-326736539	0.0349874	1.68025	5.58569	0.0251	0					AT2G05920	SBT1.8	Subtilisin-like protease SBT1.8 [Source:UniProtKB/Swiss-Prot;Acc:Q9ZUF6]
XLOC_016153	TraesCS1D02G055200	chr1D:36539271-36545902	0.0243482	1.45254	5.89862	0.01715	0					AT2G28620	0	P-loop containing nucleoside triphosphate hydrolases superfamily protein [Source:TAIR;Acc:AT2G28620]
XLOC_009648	TraesCS1B02G189700	chr1B:340370465-340375887	0.0238402	1.59708	6.0659	0.02365	0					0	0	0
XLOC_147201	TraesCS7D02G486400	chr7D:596705266-596711736	0.0225556	1.60595	6.1538	0.0217	0					0	0	0
XLOC_143964	TraesCS7D02G386500	chr7D:500819137-500826331	0.0192138	0.966415	5.65243	0.02395	0					0	0	0
XLOC_009674	TraesCS1B02G195300	chr1B:350391338-350399362	4.12567e-05	1.68551	15.3182	0.02825	0					AT1G12570	0	At1g12570 [Source:UniProtKB/TrEMBL;Acc:Q66GI5]

## Sheet: 703_Shoot_downregulated
test_id	gene	locus	703 N+(control)	703 N- (stress)	log2(fold_change)	p_value	Description	Goid	Go description	enzyme code	enzyme name	AT gene stable ID	AT gene	Atdescription
XLOC_075311	TraesCS4B02G050500	chr4B:39043115-39045780	184.223	23.0079	-3.00126	0.04925	UV-B-induced protein At3g17800, chloroplastic-like	0	0	0	0	AT1G48450	0	Alanine-tRNA ligase, putative (DUF760) [Source:UniProtKB/TrEMBL;Acc:Q9LP80]
XLOC_106609	TraesCS5D02G504200	chr5D:530775073-530776484	285.805	20.8524	-3.77675	0.0475	uncharacterized protein LOC109751753	0	0	0	0	0	0	0
XLOC_150346	TraesCSU02G138400	chrUn:126896881-126906210	158.329	10.9578	-3.85289	0.0248	Transcription factor bHLH35	F:GO:0046983	F:protein dimerization activity	0	0	AT5G57150	0	Basic helix-loop-helix (BHLH) DNA-binding superfamily protein [Source:UniProtKB/TrEMBL;Acc:F4KAJ5]
XLOC_020457	TraesCS2A02G158800	chr2A:105541271-105541541	1085.32	33.9895	-4.99689	0.0171	Subtilisin-chymotrypsin inhibitor-2B	P:GO:0009611; P:GO:0010951; F:GO:0004867	P:response to wounding; P:negative regulation of endopeptidase activity; F:serine-type endopeptidase inhibitor activity	0	0	0	0	0
XLOC_078049	TraesCS4B02G225400	chr4B:471953236-471957572	308.238	8.26551	-5.2208	0.0409	small heat shock protein 26	0	0	0	0	AT4G27670	HSP21	HSP21 [Source:UniProtKB/TrEMBL;Acc:A0A178UVU5]
XLOC_134907	TraesCS7B02G019600	chr7B:16833161-16835197	549.462	2.6565	-7.69235	0.0177	senescence-associated protein	0	0	0	0	AT4G35770	STR15	SEN1 [Source:UniProtKB/TrEMBL;Acc:A0A178UYD5]
XLOC_144688	TraesCS7D02G531600	chr7D:625650289-625652157	219.244	2.88145	-6.24959	0.02455	senescence-associated protein	0	0	0	0	AT4G35770	STR15	SEN1 [Source:UniProtKB/TrEMBL;Acc:A0A178UYD5]
XLOC_030080	TraesCS2B02G454500	chr2B:649475797-649480859	278.708	5.95887	-5.54757	0.0271	putative xyloglucan endotransglucosylase/hydrolase protein 13	P:GO:0010411; P:GO:0042546; P:GO:0071555; F:GO:0004553; F:GO:0016762; C:GO:0005618; C:GO:0048046	P:xyloglucan metabolic process; P:cell wall biogenesis; P:cell wall organization; F:hydrolase activity, hydrolyzing O-glycosyl compounds; F:xyloglucan:xyloglucosyl transferase activity; C:cell wall; C:apoplast	EC:2.4.1.207	Xyloglucan:xyloglucosyl transferase	0	0	0
XLOC_151102	TraesCSU02G009400	chrUn:12634504-12637118	335.316	18.9939	-4.14192	0.02765	putative receptor-like protein kinase At4g00960	P:GO:0006468; F:GO:0004674; F:GO:0005524	P:protein phosphorylation; F:protein serine/threonine kinase activity; F:ATP binding	EC:2.7.11	Transferring phosphorus-containing groups	0	0	0
XLOC_138571	TraesCS7B02G267300	chr7B:490429452-490433307	105.726	3.88241	-4.76723	0.0163	putative heat stress transcription factor A-6a	P:GO:0061408; F:GO:0000978; F:GO:0003700; C:GO:0005634; C:GO:0042025	P:positive regulation of transcription from RNA polymerase II promoter in response to heat stress; F:RNA polymerase II cis-regulatory region sequence-specific DNA binding; F:DNA-binding transcription factor activity; C:nucleus; C:host cell nucleus	0	0	0	0	0
XLOC_098088	TraesCS5B02G356700	chr5B:536322493-536326028	61.2997	7.05967	-3.11821	0.0473	protein PIN-LIKES 7-like	P:GO:0055085; C:GO:0016021	P:transmembrane transport; C:integral component of membrane	0	0	AT2G17500	PILS5	Protein PIN-LIKES 5 [Source:UniProtKB/Swiss-Prot;Acc:Q9SHL8]
XLOC_081350	TraesCS4D02G059000	chr4D:35119059-35126647	695.896	46.1788	-3.91357	0.03715	probable zinc metalloprotease EGY3, chloroplastic	P:GO:0006508; F:GO:0008237; C:GO:0016021	P:proteolysis; F:metallopeptidase activity; C:integral component of membrane	0	0	AT1G17870	EGY3	Probable zinc metallopeptidase EGY3, chloroplastic [Source:UniProtKB/Swiss-Prot;Acc:Q9LMU1]
XLOC_094298	TraesCS5B02G162100	chr5B:299020239-299023608	234.137	12.8926	-4.18274	0.0227	probable plastid-lipid-associated protein 2, chloroplastic	C:GO:0009507	C:chloroplast	0	0	AT4G04020	PAP1	Probable plastid-lipid-associated protein 1, chloroplastic [Source:UniProtKB/Swiss-Prot;Acc:O81439]
XLOC_142815	TraesCS7D02G152400	chr7D:101084355-101088290	80.8784	7.61645	-3.40857	0.04935	probable phospholipid hydroperoxide glutathione peroxidase	P:GO:0006979; P:GO:0055114; P:GO:0098869; F:GO:0004602	P:response to oxidative stress; P:oxidation-reduction process; P:cellular oxidant detoxification; F:glutathione peroxidase activity	EC:1.11.1.9; EC:1.11.1.7	Glutathione peroxidase; Peroxidase	AT2G25080	GPX1	Phospholipid hydroperoxide glutathione peroxidase 1, chloroplastic [Source:UniProtKB/Swiss-Prot;Acc:P52032]
XLOC_095621	TraesCS5B02G426300	chr5B:602066901-602067861	366.077	22.7591	-4.00763	0.04395	probable glutathione S-transferase GSTU1	F:GO:0004364	F:glutathione transferase activity	EC:2.5.1.18	Glutathione transferase	0	0	0
XLOC_081225	TraesCS4D02G035800	chr4D:16020854-16022009	414.942	28.0502	-3.88683	0.0375	Pre-mRNA-splicing factor 18	P:GO:0000350; P:GO:0071048; C:GO:0005682; C:GO:0046540; C:GO:0071021	P:generation of catalytic spliceosome for second transesterification step; P:nuclear retention of unspliced pre-mRNA at the site of transcription; C:U5 snRNP; C:U4/U6 x U5 tri-snRNP complex; C:U2-type post-spliceosomal complex	0	0	AT1G03140	0	F10O3.3 protein [Source:UniProtKB/TrEMBL;Acc:Q9SA55]
XLOC_052825	TraesCS3B02G096500	chr3B:64508600-64509210	1854.96	41.8232	-5.47094	0.0436	predicted protein	P:GO:0007034; C:GO:0009535	P:vacuolar transport; C:chloroplast thylakoid membrane	0	0	0	0	0
XLOC_055715	TraesCS3B02G096200	chr3B:64415991-64416598	1653.84	29.2341	-5.82202	0.02995	predicted protein	P:GO:0007034; P:GO:0007623; P:GO:0071482; C:GO:0009570; C:GO:0009941; C:GO:0098807	P:vacuolar transport; P:circadian rhythm; P:cellular response to light stimulus; C:chloroplast stroma; C:chloroplast envelope; C:chloroplast thylakoid membrane protein complex	0	0	0	0	0
XLOC_108880	TraesCS6A02G036600	chr6A:17942940-17944377	842.814	31.8656	-4.72514	0.01425	predicted protein	0	0	0	0	0	0	0
XLOC_031535	TraesCS2B02G126800	chr2B:94939530-94941077	214.188	15.6166	-3.77773	0.0499	predicted protein	0	0	0	0	0	0	0
XLOC_017228	TraesCS1D02G280200	chr1D:378103565-378106711	181.187	6.80428	-4.73489	0.04865	predicted protein	0	0	0	0	0	0	0
XLOC_041085	TraesCS2D02G257900	chr2D:314053299-314053812	127.598	8.27525	-3.94666	0.0418	predicted protein	0	0	0	0	0	0	0
XLOC_030326	TraesCS2B02G502200	chr2B:697334131-697334743	65.6306	5.08257	-3.69074	0.0445	predicted protein	0	0	0	0	0	0	0
XLOC_030329	TraesCS2B02G502700	chr2B:697394209-697394821	61.7414	3.38838	-4.18757	0.0296	predicted protein	0	0	0	0	0	0	0
XLOC_071203	TraesCS4A02G116800	chr4A:141328608-141329628	33.8196	4.08779	-3.04847	0.03985	predicted protein	P:GO:0010583	P:response to cyclopentenone	0	0	AT1G56300	0	At1g56300 [Source:UniProtKB/TrEMBL;Acc:Q8L7R1]
XLOC_117484	TraesCS6B02G140600	chr6B:139893279-139894535	153.359	8.98141	-4.09383	0.03435	polyubiquitin isoform X1	P:GO:0016567; P:GO:0019941; F:GO:0031386; F:GO:0031625; C:GO:0005634; C:GO:0005737	P:protein ubiquitination; P:modification-dependent protein catabolic process; F:protein tag; F:ubiquitin protein ligase binding; C:nucleus; C:cytoplasm	0	0	0	0	0
XLOC_116479	TraesCS6B02G412100	chr6B:685635996-685637553	1897.86	60.7949	-4.96428	0.0389	photosystem II 10 kDa polypeptide, chloroplastic	P:GO:0015979; C:GO:0009535; C:GO:0009654; C:GO:0016021	P:photosynthesis; C:chloroplast thylakoid membrane; C:photosystem II oxygen evolving complex; C:integral component of membrane	0	0	0	0	0
XLOC_076523	TraesCS4B02G311100	chr4B:601194803-601198729	117.784	7.14744	-4.04257	0.01625	pheophorbide a oxygenase, chloroplastic	P:GO:0008219; P:GO:0009816; P:GO:0009908; P:GO:0010154; P:GO:0015996; P:GO:0055114; F:GO:0010277; F:GO:0032441; F:GO:0046872; F:GO:0051537; C:GO:0009534; C:GO:0009941; C:GO:0016021	P:cell death; P:defense response to bacterium, incompatible interaction; P:flower development; P:fruit development; P:chlorophyll catabolic process; P:oxidation-reduction process; F:chlorophyllide a oxygenase [overall] activity; F:pheophorbide a oxygenase activity; F:metal ion binding; F:2 iron, 2 sulfur cluster binding; C:chloroplast thylakoid; C:chloroplast envelope; C:integral component of mem…	EC:1.13.12; EC:1.14.13.122; EC:1.14.15.17	Acting on single donors with incorporation of molecular oxygen (oxygenases). The oxygen incorporated need not be derived from O(2); Chlorophyllide a oxygenase; Pheophorbide a oxygenase	AT3G44880	PAO	Pheophorbide a oxygenase, chloroplastic [Source:UniProtKB/Swiss-Prot;Acc:Q9FYC2]
XLOC_088488	TraesCS5A02G478100	chr5A:651749002-651749512	118.498	8.0337	-3.88265	0.044	---NA---	0	0	0	0	0	0	0
XLOC_031870	TraesCS2B02G192700	chr2B:168609866-168611875	80.6884	5.58151	-3.85363	0.0447	myotubularin-related protein 3 isoform X2	F:GO:0046872	F:metal ion binding	0	0	0	0	0
XLOC_083072	TraesCS4D02G055700	chr4D:30555445-30558201	95.5231	7.79647	-3.61496	0.03795	malonyl-CoA:anthocyanidin 5-O-glucoside-6''-O-malonyltransferase	F:GO:0016747	F:transferase activity, transferring acyl groups other than amino-acyl groups	0	0	AT3G29590	5MAT	Malonyl-CoA:anthocyanidin 5-O-glucoside-6''-O-malonyltransferase [Source:UniProtKB/Swiss-Prot;Acc:Q9LJB4]
XLOC_023515	TraesCS2A02G166600	chr2A:119077810-119079491	97.6004	3.40407	-4.84155	0.03315	hypothetical protein CFC21_016008	0	0	0	0	0	0	0
XLOC_087283	TraesCS5A02G237900	chr5A:454396715-454401580	257.454	21.5891	-3.57594	0.04825	heat stress transcription factor B-1	P:GO:0045892; P:GO:0061408; F:GO:0000978; F:GO:0003700; C:GO:0005634; C:GO:0005737; C:GO:0042025	P:negative regulation of transcription, DNA-templated; P:positive regulation of transcription from RNA polymerase II promoter in response to heat stress; F:RNA polymerase II cis-regulatory region sequence-specific DNA binding; F:DNA-binding transcription factor activity; C:nucleus; C:cytoplasm; C:host cell nucleus	0	0	AT4G36990	HSFB1	Heat stress transcription factor B-1 [Source:UniProtKB/Swiss-Prot;Acc:Q96320]
XLOC_068562	TraesCS4A02G066100	chr4A:63527915-63530782	197.05	9.95704	-4.3067	0.02825	heat shock 70 kDa protein 8	P:GO:0009408; P:GO:0034620; P:GO:0042026; P:GO:0051085; F:GO:0005524; F:GO:0016887; F:GO:0031072; F:GO:0044183; F:GO:0051082; F:GO:0051787; C:GO:0005737	P:response to heat; P:cellular response to unfolded protein; P:protein refolding; P:chaperone cofactor-dependent protein refolding; F:ATP binding; F:ATPase activity; F:heat shock protein binding; F:protein folding chaperone; F:unfolded protein binding; F:misfolded protein binding; C:cytoplasm	EC:3.6.1.3; EC:3.6.1.15	Adenosinetriphosphatase; Nucleoside-triphosphate phosphatase	AT2G32120	HSP70-8	Heat shock 70 kDa protein 8 [Source:UniProtKB/Swiss-Prot;Acc:Q9SKY8]
XLOC_054205	TraesCS3B02G390700	chr3B:615748705-615751713	333.726	16.3594	-4.35047	0.01535	heat shock 70 kDa protein	P:GO:0034620; P:GO:0042026; P:GO:0051085; F:GO:0005524; F:GO:0016887; F:GO:0031072; F:GO:0044183; F:GO:0051082; F:GO:0051787; C:GO:0005737	P:cellular response to unfolded protein; P:protein refolding; P:chaperone cofactor-dependent protein refolding; F:ATP binding; F:ATPase activity; F:heat shock protein binding; F:protein folding chaperone; F:unfolded protein binding; F:misfolded protein binding; C:cytoplasm	EC:3.6.1.3; EC:3.6.1.15	Adenosinetriphosphatase; Nucleoside-triphosphate phosphatase	AT3G12580	MED37C	Probable mediator of RNA polymerase II transcription subunit 37c [Source:UniProtKB/Swiss-Prot;Acc:Q9LHA8]
XLOC_030400	TraesCS2B02G516700	chr2B:711723301-711728379	74.2894	5.35287	-3.79477	0.02195	fructan 6-exohydrolase-like isoform X2	P:GO:0005975; F:GO:0004553	P:carbohydrate metabolic process; F:hydrolase activity, hydrolyzing O-glycosyl compounds	0	0	0	0	0
XLOC_022133	TraesCS2A02G488900	chr2A:722830824-722842044	120.315	10.121	-3.5714	0.03075	fructan 6-exohydrolase	P:GO:0005975; F:GO:0004564	P:carbohydrate metabolic process; F:beta-fructofuranosidase activity	EC:3.2.1.26	Beta-fructofuranosidase	0	0	0
XLOC_040859	TraesCS2D02G211000	chr2D:168130251-168132118	282.758	17.9278	-3.97929	0.04285	F-box domain-containing protein	0	0	0	0	0	0	0
XLOC_118485	TraesCS6B02G346000	chr6B:609854032-609855241	258.846	16.4231	-3.97829	0.04545	E3 ubiquitin-protein ligase ATL31-like	P:GO:0007034; P:GO:0044267; P:GO:0046907; C:GO:0005794; C:GO:0016021	P:vacuolar transport; P:cellular protein metabolic process; P:intracellular transport; C:Golgi apparatus; C:integral component of membrane	0	0	AT1G22500	ATL15	E3 ubiquitin-protein ligase ATL15 [Source:UniProtKB/Swiss-Prot;Acc:Q9SK92]
XLOC_111517	TraesCS6A02G150900	chr6A:134947728-134949478	49.5666	6.23909	-2.98996	0.0255	CONSTANS-like protein CO7	P:GO:0009909; F:GO:0008270; C:GO:0005634	P:regulation of flower development; F:zinc ion binding; C:nucleus	0	0	0	0	0
XLOC_129505	TraesCS7A02G506000	chr7A:693815401-693816263	247.285	15.4186	-4.00343	0.0478	chaperone protein dnaJ 8, chloroplastic-like	0	0	0	0	0	0	0
XLOC_139261	TraesCS7B02G414800	chr7B:682790740-682791775	60.2318	3.03938	-4.30868	0.0337	chaperone protein dnaJ 8, chloroplastic-like	0	0	0	0	0	0	0
XLOC_062111	TraesCS3D02G218800	chr3D:298057623-298059640	82.6491	3.35038	-4.6246	0.0435	chaperone protein dnaJ 6-like	0	0	0	0	AT1G71000	0	Chaperone DnaJ-domain superfamily protein [Source:UniProtKB/TrEMBL;Acc:F4I8D6]
XLOC_129622	TraesCS7A02G529200	chr7A:709141621-709144043	434.615	20.5585	-4.40193	0.0459	chaperone protein dnaJ 11, chloroplastic-like	0	0	0	0	AT2G17880	0	At2g17880/At2g17880 [Source:UniProtKB/TrEMBL;Acc:O48828]
XLOC_144601	TraesCS7D02G516900	chr7D:616134204-616135121	277.359	13.6286	-4.34704	0.03645	chaperone protein dnaJ 11, chloroplastic-like	0	0	0	0	AT2G17880	0	At2g17880/At2g17880 [Source:UniProtKB/TrEMBL;Acc:O48828]
XLOC_135105	TraesCS7B02G064000	chr7B:69762858-69765541	236.66	24.09	-3.29631	0.03515	Chaperone protein dnaJ	0	0	0	0	AT3G14200	0	Chaperone DnaJ-domain superfamily protein [Source:UniProtKB/TrEMBL;Acc:Q9LJG5]
XLOC_105787	TraesCS5D02G328100	chr5D:420710924-420716083	153.617	11.6123	-3.72562	0.0472	chaperone protein ClpD1, chloroplastic	P:GO:0006508; P:GO:0034605; P:GO:1901002; P:GO:1902584; F:GO:0005524; F:GO:0008233; C:GO:0009507	P:proteolysis; P:cellular response to heat; P:positive regulation of response to salt stress; P:positive regulation of response to water deprivation; F:ATP binding; F:peptidase activity; C:chloroplast	0	0	AT5G51070	CLPD	Chaperone protein ClpD, chloroplastic [Source:UniProtKB/Swiss-Prot;Acc:P42762]
XLOC_097926	TraesCS5B02G321800	chr5B:506789184-506794186	81.5023	3.61106	-4.49635	0.03105	chaperone protein ClpD1, chloroplastic	P:GO:0006508; P:GO:0034605; P:GO:1901002; P:GO:1902584; F:GO:0005524; F:GO:0008233; C:GO:0009507	P:proteolysis; P:cellular response to heat; P:positive regulation of response to salt stress; P:positive regulation of response to water deprivation; F:ATP binding; F:peptidase activity; C:chloroplast	0	0	AT5G51070	CLPD	Chaperone protein ClpD, chloroplastic [Source:UniProtKB/Swiss-Prot;Acc:P42762]
XLOC_150301	TraesCSU02G131300	chrUn:110792273-110799971	196.551	11.5953	-4.0833	0.04545	chaperone protein ClpB2, chloroplastic	P:GO:0009408; P:GO:0042026; F:GO:0005524; C:GO:0009507	P:response to heat; P:protein refolding; F:ATP binding; C:chloroplast	0	0	AT5G15450	CLPB3	Chaperone protein ClpB3, chloroplastic [Source:UniProtKB/Swiss-Prot;Acc:Q9LF37]
XLOC_088829	TraesCS5A02G547300	chr5A:701069898-701076210	167.339	11.015	-3.92523	0.02935	chaperone protein ClpB2, chloroplastic	P:GO:0009408; P:GO:0042026; F:GO:0005524; C:GO:0009507	P:response to heat; P:protein refolding; F:ATP binding; C:chloroplast	0	0	AT5G15450	CLPB3	Chaperone protein ClpB3, chloroplastic [Source:UniProtKB/Swiss-Prot;Acc:Q9LF37]
XLOC_076840	TraesCS4B02G380800	chr4B:660722759-660732041	127.472	4.67753	-4.76829	0.026	chaperone protein ClpB2, chloroplastic	P:GO:0009408; P:GO:0042026; F:GO:0005524; C:GO:0009507	P:response to heat; P:protein refolding; F:ATP binding; C:chloroplast	0	0	AT5G15450	CLPB3	Chaperone protein ClpB3, chloroplastic [Source:UniProtKB/Swiss-Prot;Acc:Q9LF37]
XLOC_102677	TraesCS5D02G269400	chr5D:372454208-372454919	742.347	48.6337	-3.93206	0.0372	calcium-binding EF-hand family like-protein	F:GO:0005509	F:calcium ion binding	0	0	0	0	0
XLOC_006796	TraesCS1B02G090000	chr1B:90877277-90879389	54.587	4.73969	-3.52569	0.035	brain protein 44-like protein	P:GO:0006850; F:GO:0050833; C:GO:0031305	P:mitochondrial pyruvate transmembrane transport; F:pyruvate transmembrane transporter activity; C:integral component of mitochondrial inner membrane	0	0	AT5G20090	MPC1	Mitochondrial pyruvate carrier [Source:UniProtKB/TrEMBL;Acc:A0A178UR79]
XLOC_063138	TraesCS3D02G440200	chr3D:550648773-550654368	113.174	4.6103	-4.61754	0.006	Beta-glucosidase 5	P:GO:0005975; F:GO:0004553	P:carbohydrate metabolic process; F:hydrolase activity, hydrolyzing O-glycosyl compounds	0	0	0	0	0
XLOC_054651	TraesCS3B02G483500	chr3B:730230751-730235734	90.8624	3.37449	-4.75094	0.03865	Beta-glucosidase 5	P:GO:0005975; F:GO:0004553; C:GO:0016021	P:carbohydrate metabolic process; F:hydrolase activity, hydrolyzing O-glycosyl compounds; C:integral component of membrane	0	0	0	0	0
XLOC_001146	TraesCS1A02G234600	chr1A:410152901-410157058	157.413	10.058	-3.96813	0.0442	beta glucanase	P:GO:0005975; F:GO:0042972; C:GO:0046658	P:carbohydrate metabolic process; F:licheninase activity; C:anchored component of plasma membrane	EC:3.2.1.73	Licheninase	0	0	0
XLOC_139139	TraesCS7B02G388700	chr7B:654948844-654954107	200.654	12.2759	-4.0308	0.03215	BAG family molecular chaperone regulator 6 isoform X6	F:GO:0051087	F:chaperone binding	0	0	0	0	0
XLOC_082765	TraesCS4D02G357900	chr4D:505998196-506005300	107.242	4.34349	-4.62588	0.0191	BAG family molecular chaperone regulator 6 isoform X6	F:GO:0051087	F:chaperone binding	0	0	0	0	0
XLOC_142986	TraesCS7D02G189400	chr7D:142610131-142613723	176.949	10.5192	-4.07224	0.04735	ATP-dependent zinc metalloprotease FTSH 6, chloroplastic	P:GO:0006508; F:GO:0004176; F:GO:0004222; F:GO:0005524; C:GO:0005739; C:GO:0016020	P:proteolysis; F:ATP-dependent peptidase activity; F:metalloendopeptidase activity; F:ATP binding; C:mitochondrion; C:membrane	EC:3.4.24; EC:3.4.24.61; EC:3.6.1.3; EC:3.4.24.23; EC:3.4.24.24; EC:3.4.24.69; EC:3.4.24.64; EC:3.4.24.21; EC:3.4.24.22; EC:3.4.24.17; EC:3.4.24.18; EC:3.4.24.19; EC:3.4.24.70; EC:3.4.99; EC:3.4.24.71; EC:3.4.24.72; EC:3.4.24.56; EC:3.4.24.35; EC:3.4.24.57; EC:3.4.24.14; EC:3.4.24.37; EC:3.4.24.59; EC:3.6.1.15; EC:3.4.24.11; EC:3.4.24.55	Acting on peptide bonds (peptidases); Nardilysin; Adenosinetriphosphatase; Matrilysin; Gelatinase A; Bontoxilysin; Mitochondrial processing peptidase; Astacin; Stromelysin 2; Stromelysin 1; Meprin A; Procollagen C-endopeptidase; Oligopeptidase A; Acting on peptide bonds (peptidases); Endothelin-converting enzyme 1; Fibrolase; Insulysin; Gelatinase B; O-sialoglycoprotein endopeptidase; Procollagen…	AT5G15250	FTSH6	ATP-dependent zinc metalloprotease FTSH 6, chloroplastic [Source:UniProtKB/Swiss-Prot;Acc:Q1PDW5]
XLOC_147387	TraesCS7D02G524300	chr7D:620255731-620258600	23.9464	3.88911	-2.6223	0.0477	aspartyl protease family protein 1	P:GO:0006508; F:GO:0004190	P:proteolysis; F:aspartic-type endopeptidase activity	EC:3.4.99; EC:3.4.23.1; EC:3.4.23; EC:3.4.23.32; EC:3.4.23.43; EC:3.4.23.20; EC:3.4.23.25; EC:3.4.23.36; EC:3.4.23.4; EC:3.4.23.35; EC:3.4.23.5; EC:3.4.23.34; EC:3.4.23.15	Acting on peptide bonds (peptidases); Pepsin A; Acting on peptide bonds (peptidases); Scytalidopepsin B; Prepilin peptidase; Penicillopepsin; Saccharopepsin; Signal peptidase II; Chymosin; Barrierpepsin; Cathepsin D; Cathepsin E; Renin	AT4G35880	0	AT4G35880 protein [Source:UniProtKB/TrEMBL;Acc:B3LF45]
XLOC_000438	TraesCS1A02G089600	chr1A:79107176-79108103	502.201	38.5921	-3.70189	0.04425	ACC oxidase	P:GO:0055114; F:GO:0046872; F:GO:0051213	P:oxidation-reduction process; F:metal ion binding; F:dioxygenase activity	0	0	0	0	0
XLOC_082837	TraesCS4D02G006200	chr4D:3403376-3404528	43.3394	2.84371	-3.92983	0.04675	5-amino-6-(5-phospho-D-ribitylamino)uracil phosphatase, chloroplastic-like	F:GO:0016787	F:hydrolase activity	0	0	AT4G11570	PYRP2	5-amino-6-(5-phospho-D-ribitylamino)uracil phosphatase, chloroplastic [Source:UniProtKB/Swiss-Prot;Acc:Q9LDD5]
XLOC_024738	TraesCS2A02G424800	chr2A:678831246-678831741	115.54	7.0941	-4.02563	0.0378	36.4 kDa proline-rich protein	0	0	0	0	0	0	0
XLOC_063865	TraesCS3D02G045800	chr3D:17432105-17433883	844.68	36.542	-4.53078	0.02365	16.9 kDa class I heat shock protein 1-like	P:GO:0006457; P:GO:0009408; P:GO:0009651; P:GO:0042542; P:GO:0051259; F:GO:0043621; F:GO:0051082; C:GO:0005737	P:protein folding; P:response to heat; P:response to salt stress; P:response to hydrogen peroxide; P:protein complex oligomerization; F:protein self-association; F:unfolded protein binding; C:cytoplasm	0	0	AT1G53540	HSP17.6C	17.6 kDa class I heat shock protein 3 [Source:UniProtKB/Swiss-Prot;Acc:P13853]
XLOC_144489	TraesCS7D02G494900	chr7D:602197018-602197661	260.496	0.223227	-10.1885	0.0334	0					0	0	0
XLOC_088634	TraesCS5A02G506900	chr5A:671551270-671552788	158.485	2.40404	-6.04274	0.0265	Jacalin-related lectin 1 [Source:UniProtKB/TrEMBL;Acc:E3VWM0]					0	0	0
XLOC_145744	TraesCS7D02G182700	chr7D:136203798-136205955	102.035	1.86137	-5.77656	0.0338	0					AT1G36060	ERF055	Ethylene-responsive transcription factor ERF055 [Source:UniProtKB/Swiss-Prot;Acc:Q9SKW5]
XLOC_115323	TraesCS6B02G174500	chr6B:189124696-189134551	89.3405	5.87444	-3.92679	0.0223	0					AT2G25140	CLPB4	Chaperone protein ClpB4, mitochondrial [Source:UniProtKB/Swiss-Prot;Acc:Q8VYJ7]
XLOC_029003	TraesCS2B02G232500	chr2B:230217332-230218730	46.2536	2.0238	-4.51443	0.02315	0					0	0	0
XLOC_082040	TraesCS4D02G209700	chr4D:360953082-360957853	42.1334	0.598603	-6.13722	0.01085	Fes1B [Source:Projected from Arabidopsis thaliana (AT3G53800) UniProtKB/TrEMBL;Acc:Q9M346]					AT3G09350	Fes1A	Fes1A [Source:UniProtKB/TrEMBL;Acc:Q84J81]
XLOC_109799	TraesCS6A02G222200	chr6A:415098135-415099141	40.1285	1.86969	-4.42376	0.0244	0					0	0	0
XLOC_091034	TraesCS5A02G459200	chr5A:639306149-639307856	37.6181	1.98606	-4.24345	0.02815	RbcX2 [Source:Projected from Arabidopsis thaliana (AT5G19855) UniProtKB/TrEMBL;Acc:A0A178UCQ2]					AT5G19855	RBCX2	RbcX2 [Source:UniProtKB/TrEMBL;Acc:A0A178UCQ2]
XLOC_065616	TraesCS3D02G399600	chr3D:514650450-514652013	34.8617	1.41741	-4.62031	0.04095	0					AT1G22810	ERF019	Ethylene-responsive transcription factor ERF019 [Source:UniProtKB/Swiss-Prot;Acc:O80542]
XLOC_068592	TraesCS4A02G071700	chr4A:69313959-69315574	33.992	1.94806	-4.12509	0.0385	0					0	0	0
XLOC_029392	TraesCS2B02G317500	chr2B:453029976-453032074	28.2898	2.22973	-3.66534	0.041	0					0	0	0
XLOC_142930	TraesCS7D02G174200	chr7D:126668780-126671020	27.9031	1.44086	-4.27542	0.0427	Chaperonin-like RBCX protein 1, chloroplastic [Source:Projected from Arabidopsis thaliana (AT4G04330) UniProtKB/Swiss-Prot;Acc:Q94AU9]					AT4G04330	RBCX1	Chaperonin-like RBCX protein 1, chloroplastic [Source:UniProtKB/Swiss-Prot;Acc:Q94AU9]
XLOC_008422	TraesCS1B02G418800	chr1B:642495687-642496786	27.6904	1.79526	-3.94712	0.0319	0					0	0	0
XLOC_124803	TraesCS6D02G251800	chr6D:355854354-355859738	26.5958	0.851967	-4.96426	0.03065	Probable carotenoid cleavage dioxygenase 4, chloroplastic [Source:Projected from Arabidopsis thaliana (AT4G19170) UniProtKB/Swiss-Prot;Acc:O49675]					AT4G19170	CCD4	Probable carotenoid cleavage dioxygenase 4, chloroplastic [Source:UniProtKB/Swiss-Prot;Acc:O49675]
XLOC_042203	TraesCS2D02G502300	chr2D:596194398-596196863	25.9224	1.5772	-4.03877	0.0414	0					AT1G45201	ATTLL1	triacylglycerol lipase-like 1 [Source:TAIR;Acc:AT1G45201]
XLOC_029798	TraesCS2B02G401300	chr2B:569522917-569526997	25.524	0.601042	-5.40825	0.0388	0					0	0	0
XLOC_038465	TraesCS2D02G339900	chr2D:434138339-434140330	25.4017	1.04565	-4.60245	0.02905	0					AT3G48360	BT2	BTB/POZ and TAZ domain-containing protein 2 [Source:UniProtKB/Swiss-Prot;Acc:Q94BN0]
XLOC_104610	TraesCS5D02G085800	chr5D:91341225-91342772	25.3514	1.47034	-4.10784	0.0341	0					AT3G19553	0	PUT5 [Source:UniProtKB/TrEMBL;Acc:A0A178VGC5]
XLOC_128217	TraesCS7A02G248600	chr7A:230565212-230567023	24.9819	1.63813	-3.93076	0.0342	PsbP domain-containing protein 3, chloroplastic [Source:Projected from Arabidopsis thaliana (AT1G76450) UniProtKB/Swiss-Prot;Acc:Q9S720]					AT1G76450	PPD3	PsbP domain-containing protein 3, chloroplastic [Source:UniProtKB/Swiss-Prot;Acc:Q9S720]
XLOC_064136	TraesCS3D02G103900	chr3D:56649174-56650561	23.9751	1.92956	-3.63519	0.0458	0					0	0	0
XLOC_029447	TraesCS2B02G329600	chr2B:474350846-474355676	23.1396	0.673304	-5.10296	0.0157	0					AT5G49730	FRO6	Ferric reduction oxidase 6 [Source:UniProtKB/Swiss-Prot;Acc:Q8RWS6]
XLOC_078915	TraesCS4B02G397600	chr4B:671738835-671743414	23.0957	0.559608	-5.36706	0.0143	0					AT4G37910	HSP70-9	Heat shock 70 kDa protein 9, mitochondrial [Source:UniProtKB/Swiss-Prot;Acc:Q8GUM2]
XLOC_094737	TraesCS5B02G252700	chr5B:435768035-435769445	22.8785	1.45075	-3.97912	0.03765	0					AT5G48550	0	F-box associated ubiquitination effector family protein [Source:UniProtKB/TrEMBL;Acc:F4K1R3]
XLOC_087409	TraesCS5A02G263100	chr5A:476072759-476075399	22.5548	1.23571	-4.19001	0.03565	0					AT5G47560	TDT	Tonoplast dicarboxylate transporter [Source:UniProtKB/Swiss-Prot;Acc:Q8LG88]
XLOC_016645	TraesCS1D02G162000	chr1D:229879804-229882659	21.8027	1.26705	-4.10496	0.0343	Alpha-galactosidase [Source:UniProtKB/TrEMBL;Acc:A0A1D5SZR3]					AT5G08380	AGAL1	Alpha-galactosidase 1 [Source:UniProtKB/Swiss-Prot;Acc:Q9FT97]
XLOC_038060	TraesCS2D02G258800	chr2D:314565370-314566231	21.6808	0.144333	-7.23088	0.03285	0					0	0	0
XLOC_000937	TraesCS1A02G193200	chr1A:349358464-349360851	21.5374	1.21083	-4.15277	0.03635	0					AT1G32640	MYC2	ZBF1 [Source:UniProtKB/TrEMBL;Acc:A0A178W7C3]
XLOC_084122	TraesCS4D02G265100	chr4D:435230621-435231838	21.1231	1.37259	-3.94385	0.03255	0					0	0	0
XLOC_045769	TraesCS3A02G183800	chr3A:213256187-213259550	21.0235	0.526099	-5.32052	0.0366	0					AT5G47560	TDT	Tonoplast dicarboxylate transporter [Source:UniProtKB/Swiss-Prot;Acc:Q8LG88]
XLOC_038022	TraesCS2D02G250300	chr2D:298837057-298840633	20.9233	1.7212	-3.60363	0.0368	0					0	0	0
XLOC_061196	TraesCS3D02G033500	chr3D:12374264-12376279	20.8709	1.17054	-4.15625	0.03685	Patatin [Source:UniProtKB/TrEMBL;Acc:A0A1D5WV83]					0	0	0
XLOC_061908	TraesCS3D02G179200	chr3D:160890118-160894158	20.0344	1.26094	-3.9899	0.04225	0					AT1G02660	PLIP2	Phospholipase A1 PLIP2, chloroplastic [Source:UniProtKB/Swiss-Prot;Acc:F4HXL0]
XLOC_048098	TraesCS3A02G124700	chr3A:100840874-100844726	19.9772	1.05286	-4.24597	0.0416	0					0	0	0
XLOC_063799	TraesCS3D02G033200	chr3D:12298555-12300595	19.8902	1.03972	-4.25779	0.0277	Patatin [Source:UniProtKB/TrEMBL;Acc:A0A1D5WV83]					0	0	0
XLOC_064996	TraesCS3D02G282100	chr3D:390073947-390076511	19.4338	1.23225	-3.9792	0.04525	0					AT2G42750	0	At2g42750/F7D19.25 [Source:UniProtKB/TrEMBL;Acc:Q9SJI1]
XLOC_088615	TraesCS5A02G503700	chr5A:669564672-669572181	19.287	1.30689	-3.88342	0.03475	Methyltransferase [Source:UniProtKB/TrEMBL;Acc:A0A341VJX6]					AT1G20330	SMT2	24-methylenesterol C-methyltransferase 2 [Source:UniProtKB/Swiss-Prot;Acc:Q39227]
XLOC_151766	TraesCSU02G153200	chrUn:194669139-194673424	19.113	0.606476	-4.97796	0.04875	0					AT4G19050	0	NB-ARC domain containing disease resistance protein [Source:UniProtKB/TrEMBL;Acc:A0A221J431]
XLOC_006739	TraesCS1B02G080400	chr1B:62719856-62724509	18.5015	1.11488	-4.05268	0.03535	Glycosyltransferase [Source:UniProtKB/TrEMBL;Acc:A0A341NWY7]					AT2G28080	UGT86A2	Glycosyltransferase (Fragment) [Source:UniProtKB/TrEMBL;Acc:W8Q3F0]
XLOC_098444	TraesCS5B02G436300	chr5B:610105598-610108225	18.0302	1.28291	-3.81292	0.04825	Glycosyltransferase [Source:UniProtKB/TrEMBL;Acc:A0A1D5YXE1]					AT2G15480	UGT73B5	Glycosyltransferase [Source:UniProtKB/TrEMBL;Acc:F4IIG3]
XLOC_057071	TraesCS3B02G371200	chr3B:583391547-583393126	17.724	1.28565	-3.78513	0.03675	0					0	0	0
XLOC_056562	TraesCS3B02G275200	chr3B:444827602-444835448	17.086	1.17919	-3.85694	0.03585	0					AT1G34040	TAR3	Tryptophan aminotransferase-related protein 3 [Source:UniProtKB/Swiss-Prot;Acc:Q9FE98]
XLOC_024257	TraesCS2A02G323000	chr2A:552837950-552840178	16.9983	0.994001	-4.096	0.02815	0					AT3G48360	BT2	BTB/POZ and TAZ domain-containing protein 2 [Source:UniProtKB/Swiss-Prot;Acc:Q94BN0]
XLOC_071329	TraesCS4A02G147000	chr4A:259756273-259776272	16.257	0.476188	-5.09339	0.01255	0					AT3G57300	INO80	DNA helicase INO80-like protein [Source:UniProtKB/TrEMBL;Acc:F4J277]
XLOC_110606	TraesCS6A02G382800	chr6A:601968041-601969654	16.1122	1.04048	-3.95283	0.0328	RING-type E3 ubiquitin transferase [Source:UniProtKB/TrEMBL;Acc:A0A1D6A600]					0	0	0
XLOC_038655	TraesCS2D02G380500	chr2D:484858483-484864377	15.7998	0.580342	-4.76686	0.0345	0					0	0	0
XLOC_038326	TraesCS2D02G311100	chr2D:399967795-399972631	14.479	0.815722	-4.14974	0.03605	0					AT5G49730	FRO6	Ferric reduction oxidase 6 [Source:UniProtKB/Swiss-Prot;Acc:Q8RWS6]
XLOC_089014	TraesCS5A02G027000	chr5A:22271596-22279701	14.2209	1.01152	-3.81341	0.0475	ubiquitin-specific protease 8 [Source:Projected from Arabidopsis thaliana (AT5G22030) TAIR;Acc:AT5G22030]					AT5G22030	UBP8	ubiquitin-specific protease 8 [Source:TAIR;Acc:AT5G22030]
XLOC_016433	TraesCS1D02G112500	chr1D:108256798-108262864	13.8966	0.990544	-3.81036	0.0349	Transition metal ion transporter, Ion transpor [Source: Projected from Oryza sativa (Os05g0164800)]					AT2G30080	ZIP6	ZIP6 [Source:UniProtKB/TrEMBL;Acc:A0A178VN05]
XLOC_042346	TraesCS2D02G529500	chr2D:616625518-616627949	13.6498	0.729295	-4.22623	0.0274	RBR-type E3 ubiquitin transferase [Source:UniProtKB/TrEMBL;Acc:A0A1D5ULT6]					AT3G53690	0	RBR-type E3 ubiquitin transferase [Source:UniProtKB/TrEMBL;Acc:Q9LFF2]
XLOC_076017	TraesCS4B02G205300	chr4B:437404063-437405064	12.2809	1.64679	-2.89869	0.04405	0					AT5G48540	CRRSP55	Cysteine-rich repeat secretory protein 55 [Source:UniProtKB/Swiss-Prot;Acc:Q9LV60]
XLOC_000185	TraesCS1A02G035100	chr1A:18310848-18312699	11.8302	0.997146	-3.56853	0.04585	0					AT2G25430	0	Putative clathrin assembly protein At2g25430 [Source:UniProtKB/Swiss-Prot;Acc:Q8LF20]
XLOC_116515	TraesCS6B02G420600	chr6B:691863739-691865458	11.7994	0.0603557	-7.611	0.0328	RING-type E3 ubiquitin transferase [Source:UniProtKB/TrEMBL;Acc:A0A1D6ANT8]					0	0	0
XLOC_031234	TraesCS2B02G062500	chr2B:29759693-29761308	11.7624	1.29574	-3.18234	0.03835	0					AT2G41380	0	At2g41380 [Source:UniProtKB/TrEMBL;Acc:Q9ZVC3]
XLOC_128717	TraesCS7A02G345400	chr7A:507757189-507763146	11.567	0.673023	-4.10321	0.03345	0					AT2G42600	PPC2	PPC2 [Source:UniProtKB/TrEMBL;Acc:A0A178VV64]
XLOC_147092	TraesCS7D02G464800	chr7D:579148967-579152855	11.3899	0.792566	-3.84508	0.04945	Probable ubiquitin conjugation factor E4 [Source:Projected from Arabidopsis thaliana (AT5G15400) UniProtKB/Swiss-Prot;Acc:Q9LF41]					AT5G15400	PUB1	Probable ubiquitin conjugation factor E4 [Source:UniProtKB/Swiss-Prot;Acc:Q9LF41]
XLOC_002770	TraesCS1A02G122800	chr1A:139637057-139641051	11.097	1.08574	-3.35342	0.03635	Phosphotransferase [Source:UniProtKB/TrEMBL;Acc:A0A341NIZ3]					AT2G19860	HXK2	Phosphotransferase [Source:UniProtKB/TrEMBL;Acc:A0A178VX81]
XLOC_056598	TraesCS3B02G281800	chr3B:452489597-452491698	10.6205	0.770972	-3.78403	0.0371	0					0	0	0
XLOC_136833	TraesCS7B02G414900	chr7B:682842190-682844365	10.3525	0.653529	-3.98558	0.03095	0					0	0	0
XLOC_142602	TraesCS7D02G106000	chr7D:64011544-64016259	10.2688	1.44277	-2.83135	0.03535	F-box component of the SKP-Cullin-F box (SCF) E3 ubiquitin ligase complex, Strigolactone (SL) signal perceptio [Source: Projected from Oryza sativa (Os06g0154200)]					AT2G42620	MAX2	F-box protein MAX2 [Source:UniProtKB/Swiss-Prot;Acc:Q9SIM9]
XLOC_003602	TraesCS1A02G295600	chr1A:490509792-490525089	10.0128	0.743442	-3.75149	0.0376	0					AT4G37910	HSP70-9	Heat shock 70 kDa protein 9, mitochondrial [Source:UniProtKB/Swiss-Prot;Acc:Q8GUM2]
XLOC_025349	TraesCS2A02G556100	chr2A:760549881-760551836	9.22679	0.767437	-3.58771	0.03315	Chaperone protein dnaJ C76, chloroplastic [Source:Projected from Arabidopsis thaliana (AT5G23240) UniProtKB/Swiss-Prot;Acc:Q9FMX6]					AT5G23240	DJC76	Chaperone protein dnaJ C76, chloroplastic [Source:UniProtKB/Swiss-Prot;Acc:Q9FMX6]
XLOC_095261	TraesCS5B02G358600	chr5B:538541864-538548795	9.02852	0.716814	-3.65482	0.0412	0					AT1G14580	0	C2H2-like zinc finger protein [Source:TAIR;Acc:AT1G14580]
XLOC_030418	TraesCS2B02G519600	chr2B:714496910-714500941	8.29723	0.950686	-3.12559	0.0492	0					AT5G39590	0	TLD-domain containing nucleolar protein [Source:UniProtKB/TrEMBL;Acc:Q9FKA3]
XLOC_053426	TraesCS3B02G222000	chr3B:279641008-279689413	8.17071	1.05813	-2.94895	0.02795	0					AT2G48060	0	unknown protein; FUNCTIONS IN: molecular_function unknown; INVOLVED IN: biological_process unknown; LOCATED IN: endomembrane system; EXPRESSED IN: shoot, sperm cell; CONTAINS InterPro DOMAIN/s: Protein of unknown function DUF3595 (InterPro:IPR021999. [Source:TAIR;Acc:AT2G48060]
XLOC_070187	TraesCS4A02G404500	chr4A:678127053-678131567	7.87484	0.643202	-3.61391	0.0439	Protein DETOXIFICATION [Source:UniProtKB/TrEMBL;Acc:A0A1D6RV50]					AT5G10420	DTX26	Protein DETOXIFICATION [Source:UniProtKB/TrEMBL;Acc:A0A178UJR7]
XLOC_064836	TraesCS3D02G250600	chr3D:350821733-350827429	7.70384	0.561804	-3.77744	0.03745	Glycine cleavage system P protein [Source:UniProtKB/TrEMBL;Acc:A0A341TBW8]					AT2G26080	GLDP2	Glycine dehydrogenase (decarboxylating) 2, mitochondrial [Source:UniProtKB/Swiss-Prot;Acc:O80988]
XLOC_081586	TraesCS4D02G111900	chr4D:93067568-93071438	7.52375	0.0508403	-7.20934	0.0033	0					0	0	0
XLOC_076086	TraesCS4B02G220200	chr4B:463208677-463213325	7.10784	0.704521	-3.3347	0.0354	0					AT4G37870	PCKA	Phosphoenolpyruvate carboxykinase (ATP)-like protein [Source:UniProtKB/TrEMBL;Acc:Q0WWL8]
XLOC_053763	TraesCS3B02G292900	chr3B:471474810-471480092	6.96276	0.0528635	-7.04124	0.0328	0					AT1G72810	TS2	Threonine synthase 2, chloroplastic [Source:UniProtKB/Swiss-Prot;Acc:Q9SSP5]
XLOC_045631	TraesCS3A02G155400	chr3A:148603252-148611960	6.84404	0.554032	-3.62681	0.03585	0					AT4G28860	CKL4	Casein kinase 1-like protein 4 [Source:UniProtKB/Swiss-Prot;Acc:Q8LPI7]
XLOC_071601	TraesCS4A02G203800	chr4A:494552199-494558815	6.36626	0.546782	-3.54141	0.0465	AtACDO1 [Source:Projected from Arabidopsis thaliana (AT4G31390) UniProtKB/TrEMBL;Acc:A0A178V5V0]					AT4G31390	ABC1K1	AtACDO1 [Source:UniProtKB/TrEMBL;Acc:A0A178V5V0]
XLOC_095790	TraesCS5B02G458000	chr5B:632806039-632809407	6.00076	0.907769	-2.72475	0.0492	0					0	0	0
XLOC_104756	TraesCS5D02G114400	chr5D:133667375-133670654	4.89121	0.0508985	-6.58642	0.033	0					AT2G16120	PLT1	Putative polyol transporter 1 [Source:UniProtKB/Swiss-Prot;Acc:Q9XIH7]
XLOC_135559	TraesCS7B02G157600	chr7B:212828683-212830881	4.67875	0.637807	-2.87493	0.04465	Exocyst subunit Exo70 family protein [Source:UniProtKB/TrEMBL;Acc:A0A1D6CHD9]					AT5G50380	ATEXO70F1	Exocyst subunit Exo70 family protein [Source:UniProtKB/TrEMBL;Acc:F4K8Y6]
XLOC_028087	TraesCS2B02G045600	chr2B:22724085-22727561	4.05261	0.417767	-3.27808	0.0369	0					0	0	0
XLOC_039263	TraesCS2D02G491700	chr2D:590067534-590071863	4.01945	0.0410979	-6.61179	0.03285	0					AT5G39590	0	TLD-domain containing nucleolar protein [Source:UniProtKB/TrEMBL;Acc:Q9FKA3]
XLOC_112586	TraesCS6A02G374700	chr6A:597350947-597358981	3.28508	0.41457	-2.98624	0.04195	IRE1 [Source:UniProtKB/TrEMBL;Acc:A0A2C9PG52]					AT2G17520	IRE1A	Serine/threonine-protein kinase/endoribonuclease IRE1a [Source:UniProtKB/Swiss-Prot;Acc:Q9C5S2]
XLOC_076910	TraesCS4B02G394500	chr4B:668853962-668857956	2.99597	0.0336543	-6.47609	0.03295	0					0	0	0
XLOC_065695	TraesCS3D02G418000	chr3D:529776239-529797096	2.73107	0.283311	-3.26901	0.04445	0					AT1G24706	THO2	THO complex subunit 2 [Source:UniProtKB/Swiss-Prot;Acc:F4IAT2]
XLOC_001149	TraesCS1A02G234900	chr1A:413782216-413798795	2.67251	0.279349	-3.25805	0.0468	0					0	0	0
XLOC_031118	TraesCS2B02G038200	chr2B:17778842-17795470	2.60474	0.247841	-3.39365	0.04515	0					AT5G47020	0	unknown protein; FUNCTIONS IN: molecular_function unknown; INVOLVED IN: biological_process unknown; LOCATED IN: endomembrane system; EXPRESSED IN: 23 plant structures; EXPRESSED DURING: 13 growth stages; BEST Arabidopsis thaliana protein match is: u /.../ protein (TAIR:AT5G11700.2); Ha. [Source:TAIR;Acc:AT5G47020]
XLOC_020212	TraesCS2A02G104700	chr2A:57846789-57860109	1.45765	0.218428	-2.73841	0.04805	0					AT2G40770	0	RING-finger, DEAD-like helicase, PHD and SNF2 domain-containing protein [Source:UniProtKB/TrEMBL;Acc:F4II36]
